# Supplementary material for: Systematic Interrogation of Angiogenesis in the Ischemic Mouse Hind Limb: Vulnerabilities and Quality Assurance
Source: PubMed Central journal article supplement — Arterioscler Thromb Vasc Biol. 2020 Aug 13;40(10):2454–67. doi: 10.1161/ATVBAHA.120.315028 (PMC7505144; doi:10.1161/atvbaha.120.315028), 2020-08-13
Supplement: atv-40-2454-s001.pdf [file atv-40-2454-s001.pdf]

## SUPPLEMENTAL MATERIAL

### **Systematic interrogation of angiogenesis in the ischemic mouse hindlimb: vulnerabilities and quality assurance**

Jason J. Lee<sup>1,2,3</sup>, John-Michael Arpino<sup>1,3</sup>, Hao Yin<sup>1</sup>, Zengxuan Nong<sup>1</sup>, Alexis Szpakowski<sup>1</sup>, Abdulaziz A. Hashi<sup>1</sup>, Jacqueline Chevalier<sup>1,3</sup>, Caroline O'Neil<sup>1</sup>, J. Geoffrey Pickering<sup>1,2,3,4</sup>

<sup>1</sup>Robarts Research Institute, Western University, London, Ontario, Canada

<sup>2</sup>Department of Medicine, Western University, London, Ontario, Canada

<sup>3</sup>Department of Medical Biophysics, Western University, London, Ontario, Canada

<sup>4</sup>Department of Biochemistry, Western University, London, Ontario, Canada

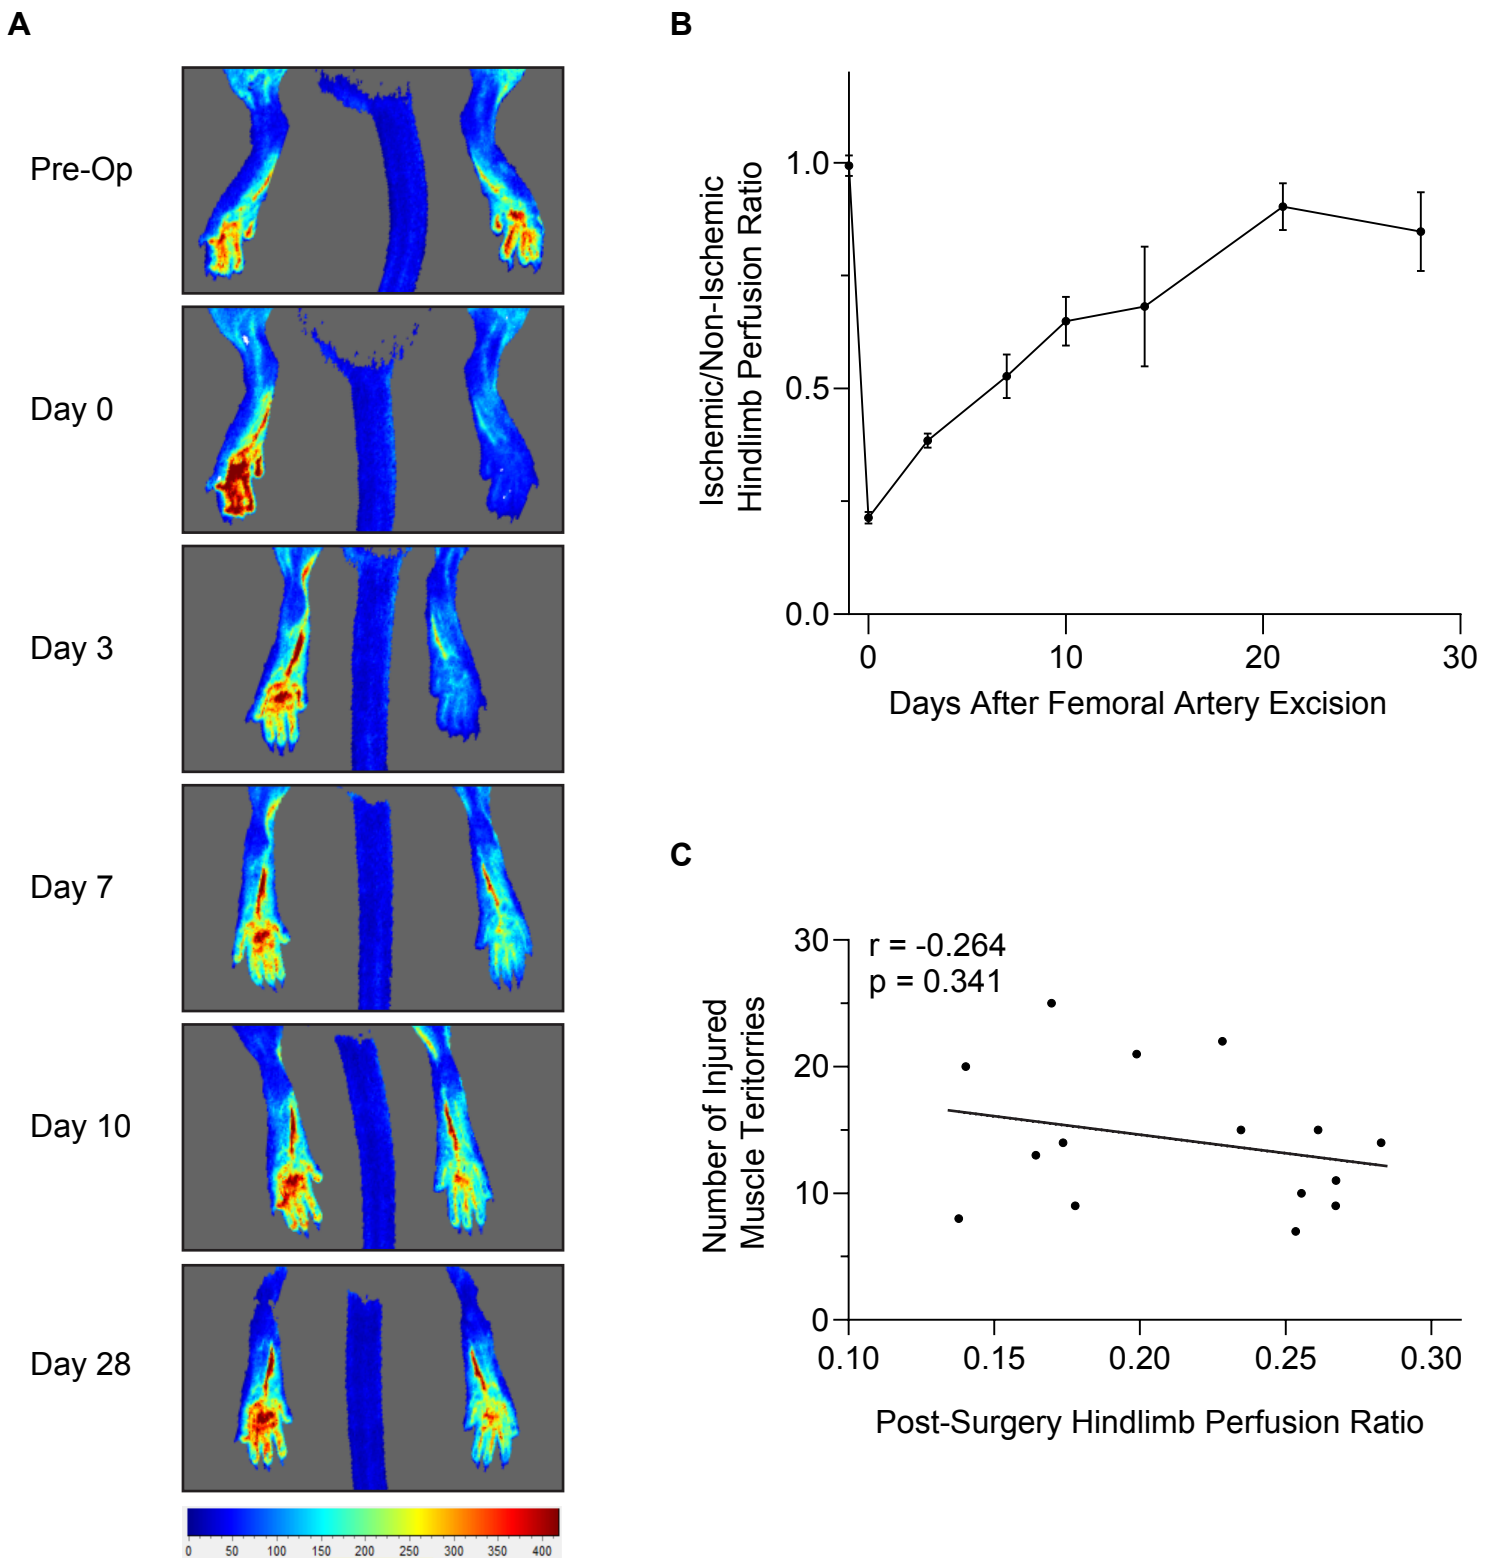

**Supplemental Figure I. Hindlimb perfusion in C57BL/6J mice subjected to right femoral artery excision**

**A.** Laser speckle contrast images depicting paw perfusion before and on the designated days after femoral artery excision. **B.** Graph of hindlimb blood flow before and after femoral artery excision. Data are presented as perfusion ratios of the injured ischemic limb to the non-injured non-ischemic limb, up to 28 days after surgery. Day 0 corresponds to immediately after the surgical procedure (mean  $\pm$  SEM,  $n = 15$  mice). **C.** Plot of post-operative perfusion ratios vs. the number of muscles showing injury 10 days after surgery, among mice with a post-operative perfusion ratio that had declined to at least 0.3 ( $n = 15$  mice). No correlation between these indices was detected.

**Supplemental Table I.** Distribution and size of injury zones, 10 days after hindlimb ischemia in C57BL6/J mice

| Proximal Hindlimb | Percent Area of Uninjured, Injured-Regenerating, and Injured-Necrotic Muscle |     |     |                         |     |     |                       |     |     |                          |     |     |                                      |     |     |                       |     |     |
|-------------------|------------------------------------------------------------------------------|-----|-----|-------------------------|-----|-----|-----------------------|-----|-----|--------------------------|-----|-----|--------------------------------------|-----|-----|-----------------------|-----|-----|
|                   | Biceps Femoris Anterior (Prox)                                               |     |     | Vastus Lateralis (Prox) |     |     | Rectus Femoris (Prox) |     |     | Vastus Medialis (Prox)   |     |     | Pectineus and Adductor Longus (Prox) |     |     |                       |     |     |
|                   | NML                                                                          | RGN | NEC | NML                     | RGN | NEC | NML                   | RGN | NEC | NML                      | RGN | NEC | NML                                  | RGN | NEC |                       |     |     |
| Mouse 1           | 100                                                                          | 0   | 0   | 100                     | 0   | 0   | 89                    | 11  | 0   | 95                       | 5   | 0   | 100                                  | 0   | 0   |                       |     |     |
| Mouse 2           | 100                                                                          | 0   | 0   | 100                     | 0   | 0   | 100                   | 0   | 0   | 49                       | 51  | 0   | 82                                   | 18  | 0   |                       |     |     |
| Mouse 3           | 100                                                                          | 0   | 0   | 100                     | 0   | 0   | 100                   | 0   | 0   | 85                       | 15  | 0   | 82                                   | 18  | 0   |                       |     |     |
| Mouse 4           | 100                                                                          | 0   | 0   | 100                     | 0   | 0   | 100                   | 0   | 0   | 100                      | 0   | 0   | 67                                   | 33  | 0   |                       |     |     |
| Mouse 5           | 100                                                                          | 0   | 0   | 100                     | 0   | 0   | 97                    | 3   | 0   | 37                       | 63  | 0   | 28                                   | 62  | 10  |                       |     |     |
| Mouse 6           | 100                                                                          | 0   | 0   | 100                     | 0   | 0   | 71                    | 28  | 1   | 0                        | 100 | 0   | 0                                    | 100 | 0   |                       |     |     |
| Mouse 7           | 100                                                                          | 0   | 0   | 100                     | 0   | 0   | 99                    | 1   | 0   | 82                       | 18  | 0   | 93                                   | 7   | 0   |                       |     |     |
| Mouse 8           | 100                                                                          | 0   | 0   | 100                     | 0   | 0   | 100                   | 0   | 0   | 88                       | 12  | 0   | 100                                  | 0   | 0   |                       |     |     |
| Mouse 9           | 100                                                                          | 0   | 0   | 100                     | 0   | 0   | 90                    | 10  | 0   | 44                       | 47  | 9   | 0                                    | 100 | 0   |                       |     |     |
| Average           | 100%                                                                         | 0%  | 0%  | 100%                    | 0%  | 0%  | 94%                   | 6%  | 0%  | 64%                      | 35% | 1%  | 61%                                  | 38% | 1%  |                       |     |     |
|                   | Biceps Femoris Posterior (Prox)                                              |     |     | Semi-membranosus (Prox) |     |     | Quadratis Femoris     |     |     | Gracilis Anterior (Prox) |     |     | Semi-tendinosus (Prox)               |     |     | Caudofemoralis (Prox) |     |     |
|                   | NML                                                                          | RGN | NEC | NML                     | RGN | NEC | NML                   | RGN | NEC | NML                      | RGN | NEC | NML                                  | RGN | NEC | NML                   | RGN | NEC |
| Mouse 1           | 100                                                                          | 0   | 0   | 100                     | 0   | 0   | 100                   | 0   | 0   | 100                      | 0   | 0   | 100                                  | 0   | 0   | 100                   | 0   | 0   |
| Mouse 2           | 100                                                                          | 0   | 0   | 100                     | 0   | 0   | 100                   | 0   | 0   | 100                      | 0   | 0   | 100                                  | 0   | 0   | 100                   | 0   | 0   |
| Mouse 3           | 100                                                                          | 0   | 0   | 100                     | 0   | 0   | 100                   | 0   | 0   | 100                      | 0   | 0   | 100                                  | 0   | 0   | 100                   | 0   | 0   |
| Mouse 4           | 100                                                                          | 0   | 0   | 100                     | 0   | 0   | 100                   | 0   | 0   | 100                      | 0   | 0   | 100                                  | 0   | 0   | 100                   | 0   | 0   |
| Mouse 5           | 100                                                                          | 0   | 0   | 22                      | 78  | 0   | 36                    | 62  | 2   | 100                      | 0   | 0   | 100                                  | 0   | 0   | 0                     | 100 | 0   |
| Mouse 6           | 100                                                                          | 0   | 0   | 100                     | 0   | 0   | 92                    | 8   | 0   | 100                      | 0   | 0   | 100                                  | 0   | 0   | 100                   | 0   | 0   |
| Mouse 7           | 100                                                                          | 0   | 0   | 100                     | 0   | 0   | 100                   | 0   | 0   | 100                      | 0   | 0   | 100                                  | 0   | 0   | 100                   | 0   | 0   |
| Mouse 8           | 100                                                                          | 0   | 0   | 100                     | 0   | 0   | 100                   | 0   | 0   | 100                      | 0   | 0   | 100                                  | 0   | 0   | 100                   | 0   | 0   |
| Mouse 9           | 22                                                                           | 78  | 0   | 100                     | 0   | 0   | 85                    | 14  | 1   | 100                      | 0   | 0   | 100                                  | 0   | 0   | 0                     | 98  | 2   |
| Average           | 91%                                                                          | 9%  | 0%  | 91%                     | 9%  | 0%  | 90%                   | 9%  | 0%  | 100%                     | 0%  | 0%  | 100%                                 | 0%  | 0%  | 78%                   | 22% | 0%  |

| Mid Hindlimb | Percent Area of Uninjured, Injured-Regenerating, and Injured-Necrotic Muscle |     |     |                        |     |     |                                |     |     |                       |     |     |                      |     |     |                       |     |     |
|--------------|------------------------------------------------------------------------------|-----|-----|------------------------|-----|-----|--------------------------------|-----|-----|-----------------------|-----|-----|----------------------|-----|-----|-----------------------|-----|-----|
|              | Vastus Lateralis (Mid)                                                       |     |     | Rectus Femoris (Mid)   |     |     | Vastus Medialis (Mid)          |     |     | Vastus Intermedius    |     |     | Caudofemoralis (Mid) |     |     | Adductor Magnus       |     |     |
|              | NML                                                                          | RGN | NEC | NML                    | RGN | NEC | NML                            | RGN | NEC | NML                   | RGN | NEC | NML                  | RGN | NEC | NML                   | RGN | NEC |
| Mouse 1      | 100                                                                          | 0   | 0   | 80                     | 20  | 0   | 62                             | 38  | 0   | 30                    | 70  | 0   | 100                  | 0   | 0   | 97                    | 3   | 0   |
| Mouse 2      | 100                                                                          | 0   | 0   | 95                     | 5   | 0   | 78                             | 22  | 0   | 40                    | 60  | 0   | 100                  | 0   | 0   | 100                   | 0   | 0   |
| Mouse 3      | 100                                                                          | 0   | 0   | 100                    | 0   | 0   | 100                            | 0   | 0   | 83                    | 17  | 0   | 100                  | 0   | 0   | 100                   | 0   | 0   |
| Mouse 4      | 100                                                                          | 0   | 0   | 100                    | 0   | 0   | 90                             | 10  | 0   | 100                   | 0   | 0   | 100                  | 0   | 0   | 100                   | 0   | 0   |
| Mouse 5      | 100                                                                          | 0   | 0   | 99                     | 1   | 0   | 17                             | 61  | 22  | 100                   | 0   | 0   | 0                    | 100 | 0   | 25                    | 67  | 8   |
| Mouse 6      | 100                                                                          | 0   | 0   | 69                     | 23  | 8   | 50                             | 46  | 4   | 54                    | 46  | 0   | 100                  | 0   | 0   | 100                   | 0   | 0   |
| Mouse 7      | 100                                                                          | 0   | 0   | 100                    | 0   | 0   | 100                            | 0   | 0   | 42                    | 58  | 0   | 100                  | 0   | 0   | 100                   | 0   | 0   |
| Mouse 8      | 100                                                                          | 0   | 0   | 100                    | 0   | 0   | 100                            | 0   | 0   | 59                    | 0   | 41  | 100                  | 0   | 0   | 66                    | 34  | 0   |
| Mouse 9      | 100                                                                          | 0   | 0   | 96                     | 4   | 0   | 34                             | 60  | 6   | 83                    | 17  | 0   | 0                    | 96  | 4   | 0                     | 92  | 8   |
| Average      | 100%                                                                         | 0%  | 0%  | 93%                    | 6%  | 1%  | 70%                            | 26% | 4%  | 66%                   | 30% | 5%  | 78%                  | 22% | 0%  | 76%                   | 22% | 2%  |
|              | Biceps Femoris Anterior (Mid)                                                |     |     | Semi-membranosus (Mid) |     |     | Biceps Femoris Posterior (Mid) |     |     | Semi-tendinosus (Mid) |     |     | Gracilis (Mid)       |     |     | Adductor Longus (Mid) |     |     |
|              | NML                                                                          | RGN | NEC | NML                    | RGN | NEC | NML                            | RGN | NEC | NML                   | RGN | NEC | NML                  | RGN | NEC | NML                   | RGN | NEC |
| Mouse 1      | 100                                                                          | 0   | 0   | 100                    | 0   | 0   | 100                            | 0   | 0   | 100                   | 0   | 0   | 100                  | 0   | 0   | 100                   | 0   | 0   |
| Mouse 2      | 100                                                                          | 0   | 0   | 100                    | 0   | 0   | 100                            | 0   | 0   | 100                   | 0   | 0   | 100                  | 0   | 0   | 100                   | 0   | 0   |
| Mouse 3      | 100                                                                          | 0   | 0   | 100                    | 0   | 0   | 100                            | 0   | 0   | 100                   | 0   | 0   | 100                  | 0   | 0   | 100                   | 0   | 0   |
| Mouse 4      | 100                                                                          | 0   | 0   | 100                    | 0   | 0   | 100                            | 0   | 0   | 100                   | 0   | 0   | 100                  | 0   | 0   | 100                   | 0   | 0   |
| Mouse 5      | 100                                                                          | 0   | 0   | 30                     | 62  | 8   | 100                            | 0   | 0   | 100                   | 0   | 0   | 100                  | 0   | 0   | 12                    | 58  | 30  |
| Mouse 6      | 100                                                                          | 0   | 0   | 100                    | 0   | 0   | 100                            | 0   | 0   | 100                   | 0   | 0   | 100                  | 0   | 0   | 100                   | 0   | 0   |
| Mouse 7      | 100                                                                          | 0   | 0   | 100                    | 0   | 0   | 100                            | 0   | 0   | 100                   | 0   | 0   | 100                  | 0   | 0   | 100                   | 0   | 0   |
| Mouse 8      | 88                                                                           | 12  | 0   | 100                    | 0   | 0   | 93                             | 7   | 0   | 100                   | 0   | 0   | 100                  | 0   | 0   | 100                   | 0   | 0   |
| Mouse 9      | 80                                                                           | 20  | 0   | 100                    | 0   | 0   | 0                              | 100 | 0   | 100                   | 0   | 0   | 100                  | 0   | 0   | 77                    | 23  | 0   |
| Average      | 96%                                                                          | 4%  | 0%  | 92%                    | 7%  | 1%  | 88%                            | 12% | 0%  | 100%                  | 0%  | 0%  | 100%                 | 0%  | 0%  | 88%                   | 9%  | 3%  |

| Distal Hindlimb | Percent Area of Uninjured, Injured-Regenerating, and Injured-Necrotic Muscle |     |     |                    |     |     |                          |     |     |                         |     |     |                 |     |     |                           |     |     |
|-----------------|------------------------------------------------------------------------------|-----|-----|--------------------|-----|-----|--------------------------|-----|-----|-------------------------|-----|-----|-----------------|-----|-----|---------------------------|-----|-----|
|                 | Popliteus                                                                    |     |     | Tibialis Posterior |     |     | Tibialis Anterior        |     |     | Flexor Digitorum Longus |     |     | Peroneus Longus |     |     | Extensor Digitorum Longus |     |     |
|                 | NML                                                                          | RGN | NEC | NML                | RGN | NEC | NML                      | RGN | NEC | NML                     | RGN | NEC | NML             | RGN | NEC | NML                       | RGN | NEC |
| Mouse 1         | 0                                                                            | 100 | 0   | 0                  | 43  | 57  | 0                        | 62  | 38  | 0                       | 71  | 29  | 0               | 88  | 12  | 0                         | 48  | 52  |
| Mouse 2         | 21                                                                           | 79  | 0   | 0                  | 54  | 46  | 2                        | 72  | 26  | 0                       | 74  | 26  | 2               | 75  | 23  | 0                         | 90  | 10  |
| Mouse 3         | 5                                                                            | 95  | 0   | 0                  | 52  | 48  | 0                        | 69  | 31  | 0                       | 82  | 18  | 0               | 100 | 0   | 0                         | 64  | 36  |
| Mouse 4         | 0                                                                            | 100 | 0   | 0                  | 40  | 60  | 0                        | 59  | 41  | 0                       | 72  | 28  | 0               | 74  | 26  | 0                         | 53  | 47  |
| Mouse 5         | 14                                                                           | 62  | 24  | 0                  | 18  | 82  | 0                        | 61  | 39  | 0                       | 59  | 41  | 0               | 75  | 25  | 0                         | 61  | 39  |
| Mouse 6         | 0                                                                            | 94  | 6   | 0                  | 20  | 80  | 0                        | 68  | 32  | 0                       | 75  | 25  | 0               | 64  | 36  | 0                         | 70  | 30  |
| Mouse 7         | 35                                                                           | 65  | 0   | 0                  | 70  | 30  | 100                      | 0   | 0   | 100                     | 0   | 0   | 100             | 0   | 0   | 100                       | 0   | 0   |
| Mouse 8         | 0                                                                            | 100 | 0   | 0                  | 61  | 39  | 0                        | 86  | 14  | 0                       | 78  | 22  | 0               | 100 | 0   | 0                         | 95  | 5   |
| Mouse 9         | 0                                                                            | 95  | 5   | 0                  | 16  | 84  | 0                        | 52  | 48  | 0                       | 32  | 68  | 0               | 51  | 49  | 0                         | 63  | 37  |
| Average         | 8%                                                                           | 88% | 4%  | 0%                 | 42% | 58% | 11%                      | 59% | 30% | 11%                     | 60% | 29% | 11%             | 70% | 19% | 11%                       | 60% | 28% |
|                 | Gastrocnemius                                                                |     |     | Soleus/Plantaris   |     |     | Semi-tendinosus (Distal) |     |     | Biceps Femoris (Distal) |     |     |                 |     |     |                           |     |     |
|                 | NML                                                                          | RGN | NEC | NML                | RGN | NEC | NML                      | RGN | NEC | NML                     | RGN | NEC |                 |     |     |                           |     |     |
| Mouse 1         | 47                                                                           | 53  | 0   | 0                  | 100 | 0   | 100                      | 0   | 0   | 100                     | 0   | 0   |                 |     |     |                           |     |     |
| Mouse 2         | 100                                                                          | 0   | 0   | 67                 | 33  | 0   | 100                      | 0   | 0   | 100                     | 0   | 0   |                 |     |     |                           |     |     |
| Mouse 3         | 74                                                                           | 26  | 0   | 0                  | 100 | 0   | 100                      | 0   | 0   | 100                     | 0   | 0   |                 |     |     |                           |     |     |
| Mouse 4         | 79                                                                           | 21  | 0   | 0                  | 100 | 0   | 100                      | 0   | 0   | 100                     | 0   | 0   |                 |     |     |                           |     |     |
| Mouse 5         | 23                                                                           | 61  | 16  | 0                  | 56  | 44  | 67                       | 33  | 0   | 100                     | 0   | 0   |                 |     |     |                           |     |     |
| Mouse 6         | 37                                                                           | 60  | 3   | 0                  | 83  | 17  | 100                      | 0   | 0   | 100                     | 0   | 0   |                 |     |     |                           |     |     |
| Mouse 7         | 97                                                                           | 3   | 0   | 0                  | 100 | 0   | 100                      | 0   | 0   | 100                     | 0   | 0   |                 |     |     |                           |     |     |
| Mouse 8         | 52                                                                           | 48  | 0   | 0                  | 100 | 0   | 100                      | 0   | 0   | 100                     | 0   | 0   |                 |     |     |                           |     |     |
| Mouse 9         | 0                                                                            | 61  | 39  | 0                  | 40  | 60  | 100                      | 0   | 0   | 100                     | 0   | 0   |                 |     |     |                           |     |     |
| Average         | 57%                                                                          | 37% | 6%  | 7%                 | 79% | 13% | 96%                      | 4%  | 0%  | 100%                    | 0%  | 0%  |                 |     |     |                           |     |     |

Individual C57BL6/J mouse data depicting the relative areas of uninjured (NML), injured-regenerating (RGN), and injured-necrotic (NEC) muscle in 33 hindlimb skeletal muscle territories, 10 days after femoral artery excision. (Prox=Proximal)

**Supplemental Table II.** Distribution and size of injury zones, 28 days after hindlimb ischemia in C57BL6/J mice

| Proximal Hindlimb | Percent Area of Uninjured, Injured-Regenerating, and Injured-Necrotic Muscle |     |     |                         |     |     |                       |     |     |                          |     |     |                                      |     |     |                       |     |     |
|-------------------|------------------------------------------------------------------------------|-----|-----|-------------------------|-----|-----|-----------------------|-----|-----|--------------------------|-----|-----|--------------------------------------|-----|-----|-----------------------|-----|-----|
|                   | Biceps Femoris Anterior (Prox)                                               |     |     | Vastus Lateralis (Prox) |     |     | Rectus Femoris (Prox) |     |     | Vastus Medialis (Prox)   |     |     | Pectineus and Adductor Longus (Prox) |     |     |                       |     |     |
|                   | NML                                                                          | RGN | NEC | NML                     | RGN | NEC | NML                   | RGN | NEC | NML                      | RGN | NEC | NML                                  | RGN | NEC |                       |     |     |
| Mouse 1           | 100                                                                          | 0   | 0   | 100                     | 0   | 0   | 100                   | 0   | 0   | 47                       | 53  | 0   | 94                                   | 6   | 0   |                       |     |     |
| Mouse 2           | 100                                                                          | 0   | 0   | 100                     | 0   | 0   | 99                    | 1   | 0   | 0                        | 100 | 0   | 60                                   | 40  | 0   |                       |     |     |
| Mouse 3           | 100                                                                          | 0   | 0   | 100                     | 0   | 0   | 81                    | 19  | 0   | 54                       | 46  | 0   | 100                                  | 0   | 0   |                       |     |     |
| Mouse 4           | 100                                                                          | 0   | 0   | 100                     | 0   | 0   | 100                   | 0   | 0   | 31                       | 69  | 0   | 100                                  | 0   | 0   |                       |     |     |
| Mouse 5           | 100                                                                          | 0   | 0   | 100                     | 0   | 0   | 100                   | 0   | 0   | 67                       | 33  | 0   | 100                                  | 0   | 0   |                       |     |     |
| Average           | 100%                                                                         | 0%  | 0%  | 100%                    | 0%  | 0%  | 96%                   | 4%  | 0%  | 40%                      | 60% | 0%  | 91%                                  | 9%  | 0%  |                       |     |     |
|                   | Biceps Femoris Posterior (Prox)                                              |     |     | Semi-membranosus (Prox) |     |     | Quadratis Femoris     |     |     | Gracilis Anterior (Prox) |     |     | Semi-tendinosus (Prox)               |     |     | Caudofemoralis (Prox) |     |     |
|                   | NML                                                                          | RGN | NEC | NML                     | RGN | NEC | NML                   | RGN | NEC | NML                      | RGN | NEC | NML                                  | RGN | NEC | NML                   | RGN | NEC |
| Mouse 1           | 100                                                                          | 0   | 0   | 100                     | 0   | 0   | 100                   | 0   | 0   | 100                      | 0   | 0   | 100                                  | 0   | 0   | 100                   | 0   | 0   |
| Mouse 2           | 23                                                                           | 77  | 0   | 23                      | 77  | 0   | 0                     | 100 | 0   | 100                      | 0   | 0   | 0                                    | 100 | 0   | 69                    | 31  | 0   |
| Mouse 3           | 100                                                                          | 0   | 0   | 100                     | 0   | 0   | 100                   | 0   | 0   | 100                      | 0   | 0   | 100                                  | 0   | 0   | 100                   | 0   | 0   |
| Mouse 4           | 88                                                                           | 12  | 0   | 0                       | 100 | 0   | 100                   | 0   | 0   | 100                      | 0   | 0   | 100                                  | 0   | 0   | 46                    | 54  | 0   |
| Mouse 5           | 100                                                                          | 0   | 0   | 100                     | 0   | 0   | 100                   | 0   | 0   | 100                      | 0   | 0   | 100                                  | 0   | 0   | 100                   | 0   | 0   |
| Average           | 82%                                                                          | 18% | 0%  | 65%                     | 35% | 0%  | 80%                   | 20% | 0%  | 100%                     | 0%  | 0%  | 80%                                  | 20% | 0%  | 83%                   | 17% | 0%  |

| Mid Hindlimb | Percent Area of Uninjured, Injured-Regenerating, and Injured-Necrotic Muscle |     |     |                        |     |     |                                |     |     |                       |     |     |                      |     |     |                       |     |     |
|--------------|------------------------------------------------------------------------------|-----|-----|------------------------|-----|-----|--------------------------------|-----|-----|-----------------------|-----|-----|----------------------|-----|-----|-----------------------|-----|-----|
|              | Vastus Lateralis (Mid)                                                       |     |     | Rectus Femoris (Mid)   |     |     | Vastus Medialis (Mid)          |     |     | Vastus Intermedius    |     |     | Caudofemoralis (Mid) |     |     | Adductor Magnus       |     |     |
|              | NML                                                                          | RGN | NEC | NML                    | RGN | NEC | NML                            | RGN | NEC | NML                   | RGN | NEC | NML                  | RGN | NEC | NML                   | RGN | NEC |
| Mouse 1      | 100                                                                          | 0   | 0   | 100                    | 0   | 0   | 92                             | 8   | 0   | 100                   | 0   | 0   | 100                  | 0   | 0   | 100                   | 0   | 0   |
| Mouse 2      | 100                                                                          | 0   | 0   | 100                    | 0   | 0   | 0                              | 100 | 0   | 0                     | 100 | 0   | 0                    | 100 | 0   | 0                     | 100 | 0   |
| Mouse 3      | 100                                                                          | 0   | 0   | 100                    | 0   | 0   | 100                            | 0   | 0   | 100                   | 0   | 0   | 100                  | 0   | 0   | 100                   | 0   | 0   |
| Mouse 4      | 100                                                                          | 0   | 0   | 100                    | 0   | 0   | 0                              | 100 | 0   | 89                    | 11  | 0   | 0                    | 100 | 0   | 0                     | 100 | 0   |
| Mouse 5      | 100                                                                          | 0   | 0   | 100                    | 0   | 0   | 68                             | 32  | 0   | 100                   | 0   | 0   | 100                  | 0   | 0   | 100                   | 0   | 0   |
| Average      | 100%                                                                         | 0%  | 0%  | 100%                   | 0%  | 0%  | 52%                            | 48% | 0%  | 78%                   | 22% | 0%  | 60%                  | 40% | 0%  | 60%                   | 40% | 0%  |
|              | Biceps Femoris Anterior (Mid)                                                |     |     | Semi-membranosus (Mid) |     |     | Biceps Femoris Posterior (Mid) |     |     | Semi-tendinosus (Mid) |     |     | Gracilis (Mid)       |     |     | Adductor Longus (Mid) |     |     |
|              | NML                                                                          | RGN | NEC | NML                    | RGN | NEC | NML                            | RGN | NEC | NML                   | RGN | NEC | NML                  | RGN | NEC | NML                   | RGN | NEC |
| Mouse 1      | 100                                                                          | 0   | 0   | 100                    | 0   | 0   | 100                            | 0   | 0   | 100                   | 0   | 0   | 100                  | 0   | 0   | 100                   | 0   | 0   |
| Mouse 2      | 100                                                                          | 0   | 0   | 0                      | 100 | 0   | 35                             | 65  | 0   | 0                     | 100 | 0   | 100                  | 0   | 0   | 0                     | 100 | 0   |
| Mouse 3      | 100                                                                          | 0   | 0   | 100                    | 0   | 0   | 100                            | 0   | 0   | 100                   | 0   | 0   | 100                  | 0   | 0   | 100                   | 0   | 0   |
| Mouse 4      | 100                                                                          | 0   | 0   | 0                      | 100 | 0   | 41                             | 59  | 0   | 100                   | 0   | 0   | 55                   | 45  | 0   | 46                    | 54  | 0   |
| Mouse 5      | 100                                                                          | 0   | 0   | 100                    | 0   | 0   | 100                            | 0   | 0   | 100                   | 0   | 0   | 100                  | 0   | 0   | 100                   | 0   | 0   |
| Average      | 100%                                                                         | 0%  | 0%  | 60%                    | 40% | 0%  | 75%                            | 25% | 0%  | 80%                   | 20% | 0%  | 91%                  | 9%  | 0%  | 69%                   | 31% | 0%  |

| Distal Hindlimb | Percent Area of Uninjured, Injured-Regenerating, and Injured-Necrotic Muscle |     |     |                    |     |     |                          |     |     |                         |     |     |                 |     |     |                           |     |     |
|-----------------|------------------------------------------------------------------------------|-----|-----|--------------------|-----|-----|--------------------------|-----|-----|-------------------------|-----|-----|-----------------|-----|-----|---------------------------|-----|-----|
|                 | Popliteus                                                                    |     |     | Tibialis Posterior |     |     | Tibialis Anterior        |     |     | Flexor Digitorum Longus |     |     | Peroneus Longus |     |     | Extensor Digitorum Longus |     |     |
|                 | Nor                                                                          | Reg | Nec | Nor                | Reg | Nec | Nor                      | Reg | Nec | Nor                     | Reg | Nec | Nor             | Reg | Nec | Nor                       | Reg | Nec |
| Mouse 1         | 85                                                                           | 15  | 0   | 0                  | 100 | 0   | 0                        | 100 | 0   | 46                      | 54  | 0   | 87              | 13  | 0   | 15                        | 85  | 0   |
| Mouse 2         | 0                                                                            | 100 | 0   | 0                  | 100 | 0   | 0                        | 100 | 0   | 0                       | 100 | 0   | 0               | 100 | 0   | 0                         | 100 | 0   |
| Mouse 3         | 0                                                                            | 100 | 0   | 0                  | 100 | 0   | 0                        | 83  | 17  | 0                       | 100 | 0   | 0               | 100 | 0   | 0                         | 100 | 0   |
| Mouse 4         | 0                                                                            | 100 | 0   | 0                  | 77  | 23  | 0                        | 89  | 11  | 0                       | 100 | 0   | 0               | 100 | 0   | 0                         | 0   | 100 |
| Mouse 5         | 22                                                                           | 78  | 0   | 0                  | 100 | 0   | 88                       | 12  | 0   | 100                     | 0   | 0   | 100             | 0   | 0   | 100                       | 0   | 0   |
| Average         | 21%                                                                          | 79% | 0%  | 0%                 | 95% | 5%  | 18%                      | 77% | 6%  | 29%                     | 71% | 0%  | 37%             | 63% | 0%  | 23%                       | 57% | 20% |
|                 | Gastrocnemius                                                                |     |     | Soleus/Plantaris   |     |     | Semi-tendinosus (Distal) |     |     | Biceps Femoris (Distal) |     |     |                 |     |     |                           |     |     |
|                 | Nor                                                                          | Reg | Nec | Nor                | Reg | Nec | Nor                      | Reg | Nec | Nor                     | Reg | Nec |                 |     |     |                           |     |     |
| Mouse 1         | 96                                                                           | 4   | 0   | 0                  | 100 | 0   | 100                      | 0   | 0   | 100                     | 0   | 0   |                 |     |     |                           |     |     |
| Mouse 2         | 0                                                                            | 100 | 0   | 0                  | 100 | 0   | 0                        | 100 | 0   | 100                     | 0   | 0   |                 |     |     |                           |     |     |
| Mouse 3         | 100                                                                          | 0   | 0   | 28                 | 72  | 0   | 100                      | 0   | 0   | 100                     | 0   | 0   |                 |     |     |                           |     |     |
| Mouse 4         | 0                                                                            | 100 | 0   | 0                  | 100 | 0   | 100                      | 0   | 0   | 100                     | 0   | 0   |                 |     |     |                           |     |     |
| Mouse 5         | 99                                                                           | 1   | 0   | 0                  | 100 | 0   | 100                      | 0   | 0   | 100                     | 0   | 0   |                 |     |     |                           |     |     |
| Average         | 59%                                                                          | 41% | 0%  | 6%                 | 94% | 0%  | 80%                      | 20% | 0%  | 100%                    | 0%  | 0%  |                 |     |     |                           |     |     |

Individual C57BL6/J mouse data depicting the relative areas of uninjured (NML), injured-regenerating (RGN), and injured-necrotic (NEC) muscle in 33 hindlimb skeletal muscle territories, 28 days after femoral artery excision. (Prox=Proximal)



**Supplemental Table III.** Distribution and size of injury zones, 10 days after hindlimb ischemia in C57BL6/N mice

| Proximal Hindlimb | Percent Area of Uninjured, Injured-Regenerating, and Injured-Necrotic Muscle |     |     |                         |     |     |                       |     |     |                          |     |     |                                      |     |     |                       |     |     |
|-------------------|------------------------------------------------------------------------------|-----|-----|-------------------------|-----|-----|-----------------------|-----|-----|--------------------------|-----|-----|--------------------------------------|-----|-----|-----------------------|-----|-----|
|                   | Biceps Femoris Anterior (Prox)                                               |     |     | Vastus Lateralis (Prox) |     |     | Rectus Femoris (Prox) |     |     | Vastus Medialis (Prox)   |     |     | Pectineus and Adductor Longus (Prox) |     |     |                       |     |     |
|                   | NML                                                                          | RGN | NEC | NML                     | RGN | NEC | NML                   | RGN | NEC | NML                      | RGN | NEC | NML                                  | RGN | NEC |                       |     |     |
| Mouse 1           | 100                                                                          | 0   | 0   | 100                     | 0   | 0   | 100                   | 0   | 0   | 20                       | 80  | 0   | 70                                   | 30  | 0   |                       |     |     |
| Mouse 2           | 100                                                                          | 0   | 0   | 100                     | 0   | 0   | 87                    | 13  | 0   | 30                       | 70  | 0   | 100                                  | 0   | 0   |                       |     |     |
| Mouse 3           | 100                                                                          | 0   | 0   | 100                     | 0   | 0   | 100                   | 0   | 0   | 43                       | 57  | 0   | 64                                   | 36  | 0   |                       |     |     |
| Mouse 4           | 100                                                                          | 0   | 0   | 100                     | 0   | 0   | 100                   | 0   | 0   | 94                       | 6   | 0   | 93                                   | 7   | 0   |                       |     |     |
| Mouse 5           | 100                                                                          | 0   | 0   | 100                     | 0   | 0   | 100                   | 0   | 0   | 0                        | 100 | 0   | 64                                   | 36  | 0   |                       |     |     |
| Average           | 100%                                                                         | 0%  | 0%  | 100%                    | 0%  | 0%  | 97%                   | 3%  | 0%  | 37%                      | 63% | 0%  | 78%                                  | 22% | 0%  |                       |     |     |
|                   | Biceps Femoris Posterior (Prox)                                              |     |     | Semi-membranosus (Prox) |     |     | Quadratis Femoris     |     |     | Gracilis Anterior (Prox) |     |     | Semi-tendinosus (Prox)               |     |     | Caudofemoralis (Prox) |     |     |
|                   | NML                                                                          | RGN | NEC | NML                     | RGN | NEC | NML                   | RGN | NEC | NML                      | RGN | NEC | NML                                  | RGN | NEC | NML                   | RGN | NEC |
| Mouse 1           | 100                                                                          | 0   | 0   | 100                     | 0   | 0   | 100                   | 0   | 0   | 100                      | 0   | 0   | 100                                  | 0   | 0   | 100                   | 0   | 0   |
| Mouse 2           | 100                                                                          | 0   | 0   | 100                     | 0   | 0   | 100                   | 0   | 0   | 100                      | 0   | 0   | 100                                  | 0   | 0   | 100                   | 0   | 0   |
| Mouse 3           | 100                                                                          | 0   | 0   | 100                     | 0   | 0   | 60                    | 40  | 0   | 100                      | 0   | 0   | 100                                  | 0   | 0   | 36                    | 64  | 0   |
| Mouse 4           | 100                                                                          | 0   | 0   | 100                     | 0   | 0   | 100                   | 0   | 0   | 100                      | 0   | 0   | 100                                  | 0   | 0   | 100                   | 0   | 0   |
| Mouse 5           | 100                                                                          | 0   | 0   | 0                       | 100 | 0   | 100                   | 0   | 0   | 100                      | 0   | 0   | 100                                  | 0   | 0   | 100                   | 0   | 0   |
| Average           | 100%                                                                         | 0%  | 0%  | 80%                     | 20% | 0%  | 92%                   | 8%  | 0%  | 100%                     | 0%  | 0%  | 100%                                 | 0%  | 0%  | 87%                   | 13% | 0%  |

| Mid Hindlimb | Percent Area of Uninjured, Injured-Regenerating, and Injured-Necrotic Muscle |     |     |                        |     |     |                                |     |     |                       |     |     |                      |     |     |                       |     |     |
|--------------|------------------------------------------------------------------------------|-----|-----|------------------------|-----|-----|--------------------------------|-----|-----|-----------------------|-----|-----|----------------------|-----|-----|-----------------------|-----|-----|
|              | Vastus Lateralis (Mid)                                                       |     |     | Rectus Femoris (Mid)   |     |     | Vastus Medialis (Mid)          |     |     | Vastus Intermedius    |     |     | Caudofemoralis (Mid) |     |     | Adductor Magnus       |     |     |
|              | NML                                                                          | RGN | NEC | NML                    | RGN | NEC | NML                            | RGN | NEC | NML                   | RGN | NEC | NML                  | RGN | NEC | NML                   | RGN | NEC |
| Mouse 1      | 100                                                                          | 0   | 0   | 100                    | 0   | 0   | 81                             | 19  | 0   | 100                   | 0   | 0   | 100                  | 0   | 0   | 100                   | 0   | 0   |
| Mouse 2      | 100                                                                          | 0   | 0   | 100                    | 0   | 0   | 76                             | 24  | 0   | 100                   | 0   | 0   | 100                  | 0   | 0   | 100                   | 0   | 0   |
| Mouse 3      | 100                                                                          | 0   | 0   | 100                    | 0   | 0   | 23                             | 77  | 0   | 100                   | 0   | 0   | 0                    | 100 | 0   | 100                   | 0   | 0   |
| Mouse 4      | 100                                                                          | 0   | 0   | 100                    | 0   | 0   | 35                             | 65  | 0   | 95                    | 5   | 0   | 100                  | 0   | 0   | 100                   | 0   | 0   |
| Mouse 5      | 100                                                                          | 0   | 0   | 100                    | 0   | 0   | 0                              | 100 | 0   | 100                   | 0   | 0   | 0                    | 100 | 0   | 100                   | 0   | 0   |
| Average      | 100%                                                                         | 0%  | 0%  | 100%                   | 0%  | 0%  | 43%                            | 57% | 0%  | 99%                   | 1%  | 0%  | 60%                  | 40% | 0%  | 100%                  | 0%  | 0%  |
|              | Biceps Femoris Anterior (Mid)                                                |     |     | Semi-membranosus (Mid) |     |     | Biceps Femoris Posterior (Mid) |     |     | Semi-tendinosus (Mid) |     |     | Gracilis (Mid)       |     |     | Adductor Longus (Mid) |     |     |
|              | NML                                                                          | RGN | NEC | NML                    | RGN | NEC | NML                            | RGN | NEC | NML                   | RGN | NEC | NML                  | RGN | NEC | NML                   | RGN | NEC |
| Mouse 1      | 100                                                                          | 0   | 0   | 100                    | 0   | 0   | 100                            | 0   | 0   | 100                   | 0   | 0   | 100                  | 0   | 0   | 100                   | 0   | 0   |
| Mouse 2      | 100                                                                          | 0   | 0   | 100                    | 0   | 0   | 100                            | 0   | 0   | 100                   | 0   | 0   | 100                  | 0   | 0   | 100                   | 0   | 0   |
| Mouse 3      | 100                                                                          | 0   | 0   | 100                    | 0   | 0   | 100                            | 0   | 0   | 100                   | 0   | 0   | 100                  | 0   | 0   | 100                   | 0   | 0   |
| Mouse 4      | 100                                                                          | 0   | 0   | 79                     | 19  | 2   | 96                             | 4   | 0   | 100                   | 0   | 0   | 100                  | 0   | 0   | 100                   | 0   | 0   |
| Mouse 5      | 100                                                                          | 0   | 0   | 0                      | 100 | 0   | 100                            | 0   | 0   | 100                   | 0   | 0   | 100                  | 0   | 0   | 28                    | 72  | 0   |
| Average      | 100%                                                                         | 0%  | 0%  | 76%                    | 24% | 0%  | 99%                            | 1%  | 0%  | 100%                  | 0%  | 0%  | 100%                 | 0%  | 0%  | 86%                   | 14% | 0%  |

| Distal Hindlimb | Percent Area of Uninjured, Injured-Regenerating, and Injured-Necrotic Muscle |     |     |                    |     |     |                          |     |     |                         |     |     |                 |     |     |                           |     |     |
|-----------------|------------------------------------------------------------------------------|-----|-----|--------------------|-----|-----|--------------------------|-----|-----|-------------------------|-----|-----|-----------------|-----|-----|---------------------------|-----|-----|
|                 | Popliteus                                                                    |     |     | Tibialis Posterior |     |     | Tibialis Anterior        |     |     | Flexor Digitorum Longus |     |     | Peroneus Longus |     |     | Extensor Digitorum Longus |     |     |
|                 | NML                                                                          | RGN | NEC | NML                | RGN | NEC | NML                      | RGN | NEC | NML                     | RGN | NEC | NML             | RGN | NEC | NML                       | RGN | NEC |
| Mouse 1         | 14                                                                           | 86  | 0   | 0                  | 38  | 62  | 0                        | 94  | 6   | 0                       | 100 | 0   | 0               | 89  | 11  | 0                         | 85  | 15  |
| Mouse 2         | 100                                                                          | 0   | 0   | 61                 | 39  | 0   | 0                        | 89  | 11  | 0                       | 100 | 0   | 0               | 100 | 0   | 0                         | 100 | 0   |
| Mouse 3         | 0                                                                            | 92  | 8   | 0                  | 100 | 0   | 0                        | 97  | 3   | 0                       | 100 | 0   | 0               | 94  | 6   | 0                         | 100 | 0   |
| Mouse 4         | 0                                                                            | 88  | 12  | 0                  | 50  | 50  | 0                        | 100 | 0   | 0                       | 90  | 10  | 0               | 70  | 30  | 0                         | 84  | 16  |
| Mouse 5         | 0                                                                            | 67  | 33  | 0                  | 20  | 80  | 0                        | 76  | 24  | 0                       | 84  | 16  | 0               | 79  | 21  | 0                         | 73  | 27  |
| Average         | 23%                                                                          | 67% | 11% | 12%                | 49% | 38% | 0%                       | 91% | 9%  | 0%                      | 95% | 5%  | 0%              | 86% | 14% | 0%                        | 88% | 12% |
|                 | Gastrocnemius                                                                |     |     | Soleus/Plantaris   |     |     | Semi-tendinosus (Distal) |     |     | Biceps Femoris (Distal) |     |     |                 |     |     |                           |     |     |
|                 | NML                                                                          | RGN | NEC | NML                | RGN | NEC | NML                      | RGN | NEC | NML                     | RGN | NEC |                 |     |     |                           |     |     |
| Mouse 1         | 100                                                                          | 0   | 0   | 79                 | 21  | 0   | 100                      | 0   | 0   | 100                     | 0   | 0   |                 |     |     |                           |     |     |
| Mouse 2         | 100                                                                          | 0   | 0   | 55                 | 45  | 0   | 100                      | 0   | 0   | 100                     | 0   | 0   |                 |     |     |                           |     |     |
| Mouse 3         | 12                                                                           | 77  | 5   | 0                  | 98  | 2   | 100                      | 0   | 0   | 100                     | 0   | 0   |                 |     |     |                           |     |     |
| Mouse 4         | 0                                                                            | 78  | 22  | 0                  | 100 | 0   | 100                      | 0   | 0   | 100                     | 0   | 0   |                 |     |     |                           |     |     |
| Mouse 5         | 10                                                                           | 76  | 14  | 0                  | 100 | 0   | 100                      | 0   | 0   | 100                     | 0   | 0   |                 |     |     |                           |     |     |
| Average         | 44%                                                                          | 46% | 8%  | 27%                | 73% | 0%  | 100%                     | 0%  | 0%  | 100%                    | 0%  | 0%  |                 |     |     |                           |     |     |

Individual C57BL6/N mouse data depicting the relative areas of uninjured (NML), injured-regenerating (RGN), and injured-necrotic (NEC) muscle in 33 hindlimb skeletal muscle territories, 10 days after femoral artery excision. (Prox=Proximal)

#### Supplemental Table IV. Studies included in the systematic manuscript review

1. Couffinhal T, Silver M, Zheng LP, Kearney M, Witzenbichler B, Isner JM. Mouse model of angiogenesis. *American Journal of Pathology*. 1998;152:1667-1679
2. Murohara T, Asahara T, Silver M, Bauters C, Masuda H, Kalka C, Kearney M, Chen D, Chen D, Symes JF, Fishman MC, Huang PL, Isner JM. Nitric oxide synthase modulates angiogenesis in response to tissue ischemia. *Journal of Clinical Investigation*. 1998;101:2567-2578
3. Couffinhal T, Silver M, Kearney M, Sullivan A, Witzenbichler B, Magner M, Annex B, Peters K, Isner JM. Impaired collateral vessel development associated with reduced expression of vascular endothelial growth factor in apoe<sup>-/-</sup> mice. *Circulation*. 1999;99:3188-3198
4. Rivard A, Fabre J-E, Silver M, Chen D, Murohara T, Kearney M, Magner M, Asahara T, Isner JM. Age-dependent impairment of angiogenesis. *Circulation*. 1999;99:111-120
5. Rivard A, Silver M, Chen D, Kearney M, Magner M, Annex B, Peters K, Isner JM. Rescue of diabetes-related impairment of angiogenesis by intramuscular gene therapy with adeno-vegf. *American Journal of Pathology*. 1999;154:355-363
6. Goukassian D, Diez-Juan A, Asahara T, Schratzberger P, Silver M, Murayama T, Isner JM, Andres V. Overexpression of p27kip1 by doxycycline-regulated adenoviral vectors inhibits endothelial cell proliferation and migration and impairs angiogenesis. *FASEB Journal*. 2001;15:1877-1885
7. Heeschen C, Jang JJ, Weis M, Pathak A, Kaji S, Hu RS, Tsao PS, Johnson FL, Cooke JP. Nicotine stimulates angiogenesis and promotes tumor growth and atherosclerosis. *Nature Medicine*. 2001;7:833-839
8. Pola R, Ling LE, Silver M, Corbley MJ, Kearney M, Pepinsky RB, Shapiro R, Taylor FR, Baker DP, Asahara T, Isner JM. The morphogen sonic hedgehog is an indirect angiogenic agent upregulating two families of angiogenic growth factors. *Nature Medicine*. 2001;7:706-711
9. Sata M, Nishimatsu H, Suzuki E, Sugiura S, Yoshizumi M, Ouchi Y, Hirata Y, Nagai R. Endothelial nitric oxide synthase is essential for the hmg-coa reductase inhibitor cerivastatin to promote collateral growth in response to ischemia. *Faseb Journal*. 2001;15:2530-+
10. Masaki I, Yonemitsu Y, Yamashita A, Sata S, Tanii M, Komori K, Nakagawa K, Hou X, Nagai Y, Hasegawa M, Sugimachi K, Sueishi K. Angiogenic gene therapy for experimental critical limb ischemia: Acceleration of limb loss by overexpression of vascular endothelial growth factor 165 but not of fibroblast growth factor-2. *Circulation Research*. 2002;90:966-973
11. Sasaki K-i, Murohara T, Ikeda H, Sugaya T, Shimada T, Shintani S, Imaizumi T. Evidence for the importance of angiotensin ii type 1 receptor in ischemia-induced angiogenesis. *Journal of Clinical Investigation*. 2002;109:603-611
12. Sata M, Hirata Y, Nagai R. Role of fas/fas ligand interaction in ischemia-induced collateral vessel growth. *Hypertens. Res*. 2002;25:577-582
13. Abe M, Sata M, Nishimatsu H, Nagata D, Suzuki E, Terauchi Y, Kadowaki T, Minamino N, Kangawa K, Matsuo H, Hirata Y, Nagai R. Adrenomedullin augments collateral development in response to acute ischemia. *Biochemical and Biophysical Research Communications*. 2003;306:10-15
14. Fukino K, Sata M, Seko Y, Hirata Y, Nagai R. Genetic background influences therapeutic effectiveness of vegf. *Biochemical and Biophysical Research Communications*. 2003;310:143-147
15. Heeschen C, Aicher A, Lehmann R, Fichtlscherer S, Vasa M, Urbich C, Mildner-Rihm C, Martin H, Zeiher AM, Dimmeler S. Erythropoietin is a potent physiologic stimulus for endothelial progenitor cell mobilization. *Blood*. 2003;102:1340-1346

16. Li TS, Hamano K, Nishida M, Hayashi M, Ito H, Mikamo A, Matsuzaki M. Cd117(+) stem cells play a key role in therapeutic angiogenesis induced by bone marrow cell implantation. *Am. J. Physiol.-Heart Circul. Physiol.* 2003;285:H931-H937
17. Michaud SE, Menard C, Guy LG, Gennaro G, Rivard A. Inhibition of hypoxia-induced angiogenesis by cigarette smoke exposure: Impairment of the hif-1alpha/vegf pathway. *FASEB Journal.* 2003;17:1150-1152
18. Pola R, Ling LE, Aprahamian TR, Barban E, Bosch-Marce M, Curry C, Corbley M, Kearney M, Isner JM, Losordo DW. Postnatal recapitulation of embryonic hedgehog pathway in response to skeletal muscle ischemia. *Circulation.* 2003;108:479-485
19. Roguin A, Avivi A, Nitecki S, Rubinstein I, Levy NS, Abassi ZA, Resnick MB, Lache O, Melamed-Frank M, Joel A, Hoffman A, Nevo E, Levy AP. Restoration of blood flow by using continuous perimuscular infiltration of plasmid DNA encoding subterranean mole rat spalax ehrenbergi vegf. *Proceedings of the National Academy of Sciences of the United States of America.* 2003;100:4644-4648
20. Roguin A, Nitecki S, Rubinstein I, Nevo E, Avivi A, Levy NS, Abassi ZA, Sabo E, Lache O, Frank M, Hoffman A, Levy AP. Vascular endothelial growth factor (vegf) fails to improve blood flow and to promote collateralization in a diabetic mouse ischemic hindlimb model. *Cardiovasc. Diabetol.* 2003;2:6
21. Yamahara K, Itoh H, Chun T-H, et al. Significance and therapeutic potential of the natriuretic peptides/cgmp/cgmp-dependent protein kinase pathway in vascular regeneration. *Proceedings of the National Academy of Sciences of the United States of America.* 2003;100:3404-3409
22. Amano K, Okigaki M, Adachi Y, Fujiyama S, Mori Y, Kosaki A, Iwasaka T, Matsubara H. Mechanism for il-1beta-mediated neovascularization unmasked by il-1beta knock-out mice. *Journal of Molecular and Cellular Cardiology.* 2004;36:469-480
23. Ezan J, Leroux L, Barandon L, Dufourcq P, Jaspard B, Moreau C, Allieres C, Daret D, Couffignal T, Duplaa C. Frza/sfrp-1, a secreted antagonist of the wnt-frizzled pathway, controls vascular cell proliferation in vitro and in vivo. *Cardiovascular Research.* 2004;63:731-738
24. Hiasa K, Ishibashi M, Ohtani K, Inoue S, Zhao Q, Kitamoto S, Sata M, Ichiki T, Takeshita A, Egashira K. Gene transfer of stromal cell-derived factor-1alpha enhances ischemic vasculogenesis and angiogenesis via vascular endothelial growth factor/endothelial nitric oxide synthase-related pathway: Next-generation chemokine therapy for therapeutic neovascularization. *Circulation.* 2004;109:2454-2461
25. Ho H-KV, Jang JJ, Kaji S, Spektor G, Fong A, Yang P, Hu BS, Schatzman R, Quertermous T, Cooke JP. Developmental endothelial locus-1 (del-1), a novel angiogenic protein: Its role in ischemia. *Circulation.* 2004;109:1314-1319
26. Jacobi J, Tam BYY, Wu G, Hoffman J, Cooke JP, Kuo CJ. Adenoviral gene transfer with soluble vascular endothelial growth factor receptors impairs angiogenesis and perfusion in a murine model of hindlimb ischemia. *Circulation.* 2004;110:2424-2429
27. Jiao C, Bronner S, Mercer KLN, Sheriff DD, Schattman GC, Dunnwald M. Epidermal cells accelerate the restoration of the blood flow in diabetic ischemic limbs. *Journal of Cell Science.* 2004;117:1055-1063
28. Johnson C, Sung HJ, Lessner SM, Fini ME, Galis ZS. Matrix metalloproteinase-9 is required for adequate angiogenic revascularization of ischemic tissues: Potential role in capillary branching. *Circulation Research.* 2004;94:262-268
29. Kanematsu A, Marui A, Yamamoto S, Ozeki M, Hirano Y, Yamamoto M, Ogawa O, Komeda M, Tabata Y. Type i collagen can function as a reservoir of basic fibroblast growth factor. *Journal of Controlled Release.* 2004;99:281-292

30. Li TS, Hayashi M, Liu ZL, Ito H, Mikamo A, Furutani A, Matsuzaki M, Hamano K. Low angiogenic potency induced by the implantation of ex vivo expanded cd117(+) stem cells. *Am. J. Physiol.-Heart Circul. Physiol.* 2004;286:H1236-H1241
31. Niiyama H, Kai H, Yamamoto T, Shimada T, Sasaki K-i, Murohara T, Egashira K, Imaizumi T. Roles of endogenous monocyte chemoattractant protein-1 in ischemia-induced neovascularization. *Journal of the American College of Cardiology.* 2004;44:661-666
32. Sata M, Nishimatsu H, Osuga J-i, Tanaka K, Ishizaka N, Ishibashi S, Hirata Y, Nagai R. Statins augment collateral growth in response to ischemia but they do not promote cancer and atherosclerosis. *Hypertension (Baltimore).* 2004;43:1214-1220
33. Shibata R, Ouchi N, Kihara S, Sato K, Funahashi T, Walsh K. Adiponectin stimulates angiogenesis in response to tissue ischemia through stimulation of amp-activated protein kinase signaling. *Journal of Biological Chemistry.* 2004;279:28670-28674
34. Achan V, Ho HK, Heeschen C, Stuehlinger M, Jang JJ, Kimoto M, Vallance P, Cooke JP. Adma regulates angiogenesis: Genetic and metabolic evidence. *Vasc. Med.* 2005;10:7-14
35. Ackah E, Yu J, Zoellner S, Iwakiri Y, Skurk C, Shibata R, Ouchi N, Easton RM, Galasso G, Birnbaum MJ, Walsh K, Sessa WC. Akt1/protein kinase b alpha is critical for ischemic and vegf-mediated angiogenesis. *Journal of Clinical Investigation.* 2005;115:2119-2127
36. Ikeda S, Ushio-Fukai M, Zuo L, Tojo T, Dikalov S, Patrushev NA, Alexander RW. Novel role of arf6 in vascular endothelial growth factor-induced signaling and angiogenesis. *Circulation Research.* 2005;96:467-475
37. Irie H, Tatsumi T, Takamiya M, Zen K, Takahashi T, Azuma A, Tateishi K, Nomura T, Hayashi H, Nakajima N, Okigaki M, Matsubara H. Carbon dioxide-rich water bathing enhances collateral blood flow in ischemic hindlimb via mobilization of endothelial progenitor cells and activation of no-cgmp system. *Circulation.* 2005;111:1523-1529
38. Izumi Y, Kim-Mitsuyama S, Yoshiyama M, Omura T, Shiota M, Matsuzawa A, Yukimura T, Murohara T, Takeya M, Ichijo H, Yoshikawa J, Iwao H. Important role of apoptosis signal-regulating kinase 1 in ischemia-induced angiogenesis. *Arteriosclerosis Thrombosis and Vascular Biology.* 2005;25:1877-1883
39. Jacobi J, Sydow K, von Degenfeld G, Zhang Y, Dayoub H, Wang B, Patterson AJ, Kimoto M, Blau HM, Cooke JP. Overexpression of dimethylarginine dimethylaminohydrolase reduces tissue asymmetric dimethylarginine levels and enhances angiogenesis. *Circulation.* 2005;111:1431-1438
40. Jeon O, Ryu SH, Chung JH, Kim B-S. Control of basic fibroblast growth factor release from fibrin gel with heparin and concentrations of fibrinogen and thrombin. *Journal of Controlled Release.* 2005;105:249-259
41. Kermani P, Rafii D, Jin DK, Whitlock P, Schaffer W, Chiang A, Vincent L, Friedrich M, Shido K, Hackett NR, Crystal RG, Rafii S, Hempstead BL. Neurotrophins promote revascularization by local recruitment of trkb+ endothelial cells and systemic mobilization of hematopoietic progenitors. *Journal of Clinical Investigation.* 2005;115:653-663
42. Li T-S, Ito H, Hayashi M, Furutani A, Matsuzaki M, Hamano K. Cellular expression of integrin-beta1 is of critical importance for inducing therapeutic angiogenesis by cell implantation. *Cardiovascular Research.* 2005;65:64-72
43. Marui A, Kanematsu A, Yamahara K, Doi K, Kushibiki T, Yamamoto M, Itoh H, Ikeda T, Tabata Y, Komeda M. Simultaneous application of basic fibroblast growth factor and hepatocyte growth factor to enhance the blood vessels formation. *Journal of Vascular Surgery.* 2005;41:82-90
44. Minamino K, Adachi Y, Okigaki M, et al. Macrophage colony-stimulating factor (m-csf), as well as granulocyte colony-stimulating factor (g-csf), accelerates neovascularization. *Stem Cells (Miami)*. 2005;23:347-354
45. Nakagami H, Maeda K, Morishita R, Iguchi S, Nishikawa T, Takami Y, Kikuchi Y, Saito Y, Tamai K, Ogihara T, Kaneda Y. Novel autologous cell therapy in ischemic limb disease

- through growth factor secretion by cultured adipose tissue-derived stromal cells. *Arteriosclerosis Thrombosis and Vascular Biology*. 2005;25:2542-2547
46. Napoli C, Williams-Ignarro S, de Nigris F, de Rosa G, Lerman LO, Farzati B, Matarazzo A, Sica G, Botti C, Fiore A, Byrns RE, Sumi D, Sica V, Ignarro LJ. Beneficial effects of concurrent autologous bone marrow cell therapy and metabolic intervention in ischemia-induced angiogenesis in the mouse hindlimb. *Proceedings of the National Academy of Sciences of the United States of America*. 2005;102:17202-17206
  47. Ouchi N, Shibata R, Walsh K. Amp-activated protein kinase signaling stimulates vegf expression and angiogenesis in skeletal muscle. *Circulation Research*. 2005;96:838-846
  48. Schiekofer S, Galasso G, Sato K, Kraus BJ, Walsh K. Impaired revascularization in a mouse model of type 2 diabetes is associated with dysregulation of a complex angiogenic-regulatory network. *Arteriosclerosis Thrombosis and Vascular Biology*. 2005;25:1603-1609
  49. Tojo T, Ushio-Fukai M, Yamaoka-Tojo M, Ikeda S, Patrushev N, Alexander RW. Role of gp91(phox) (nox2)-containing nad(p)h oxidase in angiogenesis in response to hindlimb ischemia. *Circulation*. 2005;111:2347-2355
  50. Yoshida J, Ohmori K, Takeuchi H, Shinomiya K, Namba T, Kondo I, Kiyomoto H, Kohno M. Treatment of ischemic limbs based on local recruitment of vascular endothelial growth factor-producing inflammatory cells with ultrasonic microbubble destruction. *Journal of the American College of Cardiology*. 2005;46:899-905
  51. Yu J, deMuinck ED, Zhuang Z, Drinane M, Kauser K, Rubanyi GM, Qian HS, Murata T, Escalante B, Sessa WC. Endothelial nitric oxide synthase is critical for ischemic remodeling, mural cell recruitment, and blood flow reserve. *Proceedings of the National Academy of Sciences of the United States of America*. 2005;102:10999-11004
  52. Abe M, sata MS, Suzuki E, Takeda R, Takahashi M, Nishimatsu H, Nagata D, Kangawa K, Matsuo H, Nagai R, Hirata Y. Effects of adrenomedullin on acute ischaemia-induced collateral development and mobilization of bone-marrow-derived cells. *Clinical Science (London)*. 2006;111:381-387
  53. Akasaki Y, Miyata M, Eto H, Shirasawa T, Hamada N, Ikeda Y, Biro S, Otsuji Y, Tei C. Repeated thermal therapy up-regulates endothelial nitric oxide synthase and augments angiogenesis in a mouse model of hindlimb ischemia. *Circulation Journal*. 2006;70:463-470
  54. Capoccia BJ, Shepherd RM, Link DC. G-csf and amd3100 mobilize monocytes into the blood that stimulate angiogenesis in vivo through a paracrine mechanism. *Blood*. 2006;108:2438-2445
  55. Cho S-W, Gwak S-J, Kang S-W, Bhang SH, Song KW, Yang Y-S, Choi CY, Kim B-S. Enhancement of angiogenic efficacy of human cord blood cell transplantation. *Tissue Engineering*. 2006;12:1651-1661
  56. Egami K, Murohara T, Aoki M, Matsuishi T. Ischemia-induced angiogenesis: Role of inflammatory response mediated by p-selectin. *Journal of Leukocyte Biology*. 2006;79:971-976
  57. Galasso G, Schiekofer S, Sato K, Shibata R, Handy DE, Ouchi N, Leopold JA, Loscalzo J, Walsh K. Impaired angiogenesis in glutathione peroxidase-1-deficient mice is associated with endothelial progenitor cell dysfunction. *Circulation Research*. 2006;98:254-261
  58. Gigante B, Morlino G, Gentile MT, Persico MG, De Falco S. Plgf(-/-) enos(-/-) mice show defective angiogenesis associated with increased oxidative stress in response to tissue ischemia. *FASEB Journal*. 2006;20
  59. He Y, Luo Y, Tang S, et al. Critical function of bmx/etk in ischemia-mediated arteriogenesis and angiogenesis. *Journal of Clinical Investigation*. 2006;116:2344-2355
  60. Jeon O, Hwang KC, Yoo KJ, Kim BS. Combined sustained delivery of basic fibroblast growth factor and administration of granulocyte colony-stimulating factor: Synergistic effect on angiogenesis in mouse ischemic limbs. *J. Endovascular Ther.* 2006;13:175-181

61. Jeon O, Kang S-W, Lim H-W, Choi D, Kim D-I, Lee SH, Chung JH, Kim B-S. Synergistic effect of sustained delivery of basic fibroblast growth factor and bone marrow mononuclear cell transplantation on angiogenesis in mouse ischemic limbs. *Biomaterials*. 2006;27:1617-1625
62. Jeon O, Kang S-W, Lim H-W, Chung JH, Kim B-S. Long-term and zero-order release of basic fibroblast growth factor from heparin-conjugated poly(l-lactide-co-glycolide) nanospheres and fibrin gel. *Biomaterials*. 2006;27:1598-1607
63. Jin DK, Shido K, Kopp H-G, et al. Cytokine-mediated deployment of sdf-1 induces revascularization through recruitment of cxcr4(+) hemangiocytes. *Nature Medicine*. 2006;12:557-567
64. Kim K-i, Cho H-J, Hahn J-Y, Kim T-Y, Park K-W, Koo B-K, Shin CS, Kim C-H, Oh B-H, Lee M-M, Park Y-B, Kim H-S. Beta-catenin overexpression augments angiogenesis and skeletal muscle regeneration through dual mechanism of vascular endothelial growth factor-mediated endothelial cell proliferation and progenitor cell mobilization. *Arteriosclerosis Thrombosis and Vascular Biology*. 2006;26:91-98
65. Luo D, Luo Y, He Y, Zhang H, Zhang R, Li X, Dobrucki WL, Sinusas AJ, Sessa WC, Min W. Differential functions of tumor necrosis factor receptor 1 and 2 signaling in ischemia-mediated arteriogenesis and angiogenesis. *American Journal of Pathology*. 2006;169:1886-1898
66. Tateno K, Minamino T, Toko H, et al. Critical roles of muscle-secreted angiogenic factors in therapeutic neovascularization. *Circulation Research*. 2006;98:1194-1202
67. Wang CH, Verma S, Hsieh IC, Chen YJ, Kuo LT, Yang NI, Wang SY, Wu MY, Hsu CM, Cheng CW, Cherng WJ. Enalapril increases ischemia-induced endothelial progenitor cell mobilization through manipulation of the cd26 system. *Journal of Molecular and Cellular Cardiology*. 2006;41:34-43
68. Xie D, Li Y, Reed EA, Odronic SI, Kontos CD, Annex BH. An engineered vascular endothelial growth factor-activating transcription factor induces therapeutic angiogenesis in apoe knockout mice with hindlimb ischemia. *Journal of Vascular Surgery*. 2006;44:166-175
69. Yamada Y, Takakura N. Physiological pathway of differentiation of hematopoietic stem cell population into mural cells. *Journal of Experimental Medicine*. 2006;203:1055-1065
70. Yamaoka-Tojo M, Tojo T, Kim HW, Hilenski L, Patrushev NA, Zhang L, Fukai T, Ushio-Fukai M. Iqgap1 mediates ve-cadherin-based cell-cell contacts and vegf signaling at adherence junctions linked to angiogenesis. *Arteriosclerosis Thrombosis and Vascular Biology*. 2006;26:1991-1997
71. Yoon C-H, Hur J, Oh I-Y, Park K-W, Kim T-Y, Shin J-H, Kim J-H, Lee C-S, Chung J-K, Park Y-B, Kim H-S. Intercellular adhesion molecule-1 is upregulated in ischemic muscle, which mediates trafficking of endothelial progenitor cells. *Arteriosclerosis Thrombosis and Vascular Biology*. 2006;26:1066-1072
72. Yu J, Lei L, Liang Y, Hinh L, Hickey RP, Huang Y, Liu D, Yeh JL, Rebar E, Case C, Spratt K, Sessa WC, Giordano FJ. An engineered vegf-activating zinc finger protein transcription factor improves blood flow and limb salvage in advanced-age mice. *FASEB Journal*. 2006;20
73. Zhang Y, Adachi Y, Iwasaki M, Minamino K, Suzuki Y, Nakano K, Koike Y, Mukaide H, Shigematsu A, Kiriyama N, Li C, Ikehara S. G-csf and/or m-csf accelerate differentiation of bone marrow cells into endothelial progenitor cells in vitro. *Oncology Reports*. 2006;15:1523-1527
74. Arai Y, Fujita M, Marui A, Hirose K, Sakaguchi H, Ikeda T, Tabata Y, Komeda M. Combined treatment with sustained-release basic fibroblast growth factor and heparin enhances neovascularization in hypercholesterolemic mouse hindlimb ischemia. *Circulation Journal*. 2007;71:412-417



75. Chen RR, Snow JK, Palmer JP, Lin AS, Duvall CL, Guldberg RE, Mooney DJ. Host immune competence and local ischemia affects the functionality of engineered vasculature. *Microcirculation (New York)*. 2007;14:77-88
76. Cheng XW, Kuzuya M, Nakamura K, et al. Mechanisms underlying the impairment of ischemia-induced neovascularization in matrix metalloproteinase 2-deficient mice. *Circulation Research*. 2007;100:904-913
77. Contreras-Shannon V, Ochoa O, Reyes-Reyna SM, Sun D, Michalek JE, Kuziel WA, McManus LM, Shireman PK. Fat accumulation with altered inflammation and regeneration in skeletal muscle of *ccr2*<sup>-/-</sup> mice following ischemic injury. *American Journal of Physiology - Cell Physiology*. 2007;292:C953-C967
78. de Nigris F, Williams-Ignarro S, Sica V, D'Armiento FP, Lerman LO, Byrns RE, Sica G, Fiorito C, Ignarro LJ, Napoli C. Therapeutic effects of concurrent autologous bone marrow cell infusion and metabolic intervention in ischemia-induced angiogenesis in the hypercholesterolemic mouse hindlimb. *International Journal of Cardiology*. 2007;117:238-243
79. Egger M, Schgoer W, Beer AGE, et al. Hypoxia up-regulates the angiogenic cytokine secretoneurin via an hif-1 alpha- and basic fgf-dependent pathway in muscle cells. *FASEB Journal*. 2007;21:2906-2917
80. Emanuelli C, Caporali A, Krankel N, Cristofaro B, Van Linthout S, Madeddu P. Type-2 diabetic *lepr*(*db/db*) mice show a defective microvascular phenotype under basal conditions and an impaired response to angiogenesis gene therapy in the setting of limb ischemia. *Frontiers in Bioscience-Landmark*. 2007;12:2003-2012
81. Goukassian DA, Qin G, Dolan C, et al. Tumor necrosis factor-alpha receptor p75 is required in ischemia-induced neovascularization. *Circulation*. 2007;115:752-762
82. Hur J, Yoon C-H, Lee C-S, Kim T-Y, Oh I-Y, Park K-W, Kim J-H, Lee H-S, Kang H-J, Chae I-H, Oh B-H, Park Y-B, Kim H-S. Akt is a key modulator of endothelial progenitor cell trafficking in ischemic muscle. *Stem Cells (Miami)*. 2007;25:1769-1778
83. Ichihara S, Yamada Y, Ichihara G, Nakajima T, Li P, Kondo T, Gonzalez FJ, Murohara T. A role for the aryl hydrocarbon receptor in regulation of ischemia-induced angiogenesis. *Arterioscler Thromb Vasc Biol*. 2007;27:1297-1304
84. Jeon O, Song SJ, Bhang SH, Choi C-Y, Kim MJ, Kim B-S. Additive effect of endothelial progenitor cell mobilization and bone marrow mononuclear cell transplantation on angiogenesis in mouse ischemic limbs. *Journal of Biomedical Science*. 2007;14:323-330
85. Kim HW, Lin A, Guldberg RE, Ushio-Fukai M, Fukai T. Essential role of extracellular sod in reparative neovascularization induced by hindlimb ischemia. *Circulation Research*. 2007;101:409-419
86. Kubo M, Li TS, Suzuki R, Ohshima M, Qin SL, Hamano K. Short-term pretreatment with low-dose hydrogen peroxide enhances the efficacy of bone marrow cells for therapeutic angiogenesis. *Am J Physiol Heart Circ Physiol*. 2007;292:H2582-2588
87. Lee J-S, Kim J-M, Kim KL, Jang H-S, Shin I-S, Jeon E-S, Suh W, Byun J, Kim D-K. Combined administration of naked DNA vectors encoding vegf and bfgf enhances tissue perfusion and arteriogenesis in ischemic hindlimb. *Biochemical and Biophysical Research Communications*. 2007;360:752-758
88. Lefevre J, Michaud S-E, Haddad P, Dussault S, Menard C, Groleau J, Turgeon J, Rivard A. Moderate consumption of red wine (cabernet sauvignon) improves ischemia-induced neovascularization in *apoe*-deficient mice: Effect on endothelial progenitor cells and nitric oxide. *FASEB Journal*. 2007;21:3845-3852
89. Li Y, Hazarika S, Xie D, Phippen AM, Kontos CD, Annex BH. In mice with type 2 diabetes, a vascular endothelial growth factor (vegf)-activating transcription factor modulates vegf signaling and induces therapeutic angiogenesis after hindlimb ischemia. *Diabetes*. 2007;56:656-665

90. Matsui A, Okigaki M, Amano K, et al. Central role of calcium-dependent tyrosine kinase pyk2 in endothelial nitric oxide synthase-mediated angiogenic response and vascular function. *Circulation*. 2007;116:1041-1051
91. Miyake Y, Ohmori K, Yoshida J, Ishizawa M, Mizukawa M, Yukiiri K, Kohno M. Granulocyte colony-stimulating factor facilitates the angiogenesis induced by ultrasonic microbubble destruction. *Ultrasound in Medicine and Biology*. 2007;33:1796-1804
92. Nakano M, Satoh K, Fukumoto Y, Ito Y, Kagaya Y, Ishii N, Sugamura K, Shimokawa H. Important role of erythropoietin receptor to promote vegf expression and angiogenesis in peripheral ischemia in mice. *Circulation Research*. 2007;100:662-669
93. Rajasingh J, Bord E, Qin G, Li M, Silver M, Hamada H, Ahluwalia D, Goukassian D, Zhu Y, Losordo DW, Kishore R. Enhanced voluntary alcohol consumption after estrogen supplementation negates estrogen-mediated vascular repair in ovariectomized mice. *Endocrinology*. 2007;148:3618-3624
94. Ryzhov S, McCaleb JL, Goldstein AE, Biaggioni I, Feoktistov I. Role of adenosine receptors in the regulation of angiogenic factors and neovascularization in hypoxia. *Journal of Pharmacology and Experimental Therapeutics*. 2007;320:565-572
95. Senthilkumar A, Smith RD, Khitha J, Arora N, Veerareddy S, Langston W, Chidlow JH, Jr., Barlow SC, Teng X, Patel RP, Lefer DJ, Kevil CG. Sildenafil promotes ischemia-induced angiogenesis through a p38-dependent pathway. *Arteriosclerosis Thrombosis and Vascular Biology*. 2007;27:1947-1954
96. Silva EA, Mooney DJ. Spatiotemporal control of vascular endothelial growth factor delivery from injectable hydrogels enhances angiogenesis. *J. Thromb. Haemost.* 2007;5:590-598
97. Sumi M, Sata M, Hashimoto A, Imaizumi T, Yanaga K, Ohki T, Mori T, Nagai R. Opc-28326, a selective femoral arterial vasodilator, augments ischemia induced angiogenesis. *Biomedicine & Pharmacotherapy*. 2007;61:209-215
98. Sumi M, Sata M, Miura S-i, Rye K-A, Toya N, Kanaoka Y, Yanaga K, Ohki T, Saku K, Nagai R. Reconstituted high-density lipoprotein stimulates differentiation of endothelial progenitor cells and enhances ischemia-induced angiogenesis. *Arteriosclerosis Thrombosis and Vascular Biology*. 2007;27:813-818
99. Sumi M, Sata M, Toya N, Yanaga K, Ohki T, Nagai R. Transplantation of adipose stromal cells, but not mature adipocytes, augments ischemia-induced angiogenesis. *Life Sciences*. 2007;80:559-565
100. Takeshita K, Satoh M, Li M, Silver M, Limbourg FP, Mukai Y, Rikitake Y, Radtke F, Gridley T, Losordo DW, Liao JK. Critical role of endothelial notch1 signaling in postnatal angiogenesis. *Circulation Research*. 2007;100:70-78
101. Tan Y, Shao H, Eton D, Yang Z, Alonso-Diaz L, Zhang H, Schulick A, Livingstone AS, Yu H. Stromal cell-derived factor-1 enhances pro-angiogenic effect of granulocyte-colony stimulating factor. *Cardiovascular Research*. 2007;73:823-832
102. Traktuev DO, Tsokolaeva ZI, Shevelev AA, Talitskiy KA, Stepanova VV, Johnstone BH, Rahmat-Zade TM, Kapustin AN, Tkachuk VA, March KL, Parfyonova YV. Urokinase gene transfer augments angiogenesis in ischemic skeletal and myocardial muscle. *Molecular Therapy*. 2007;15:1939-1946
103. Wang S, Tang Y-i, Yang Y-z, Xu Z-x, Peng K. Opposite effects of web2086 on angiogenesis in atheromas and ischemic hindlimb of apoe gene deficient mice. *Chinese Medical Journal (English Edition)*. 2007;120:886-892
104. Arany Z, Foo S-Y, Ma Y, Ruas JL, Bommi-Reddy A, Girnun G, Cooper M, Laznik D, Chinsomboon J, Rangwala SM, Baek KH, Rosenzweig A, Spiegelman BM. Hif-independent regulation of vegf and angiogenesis by the transcriptional coactivator p38-1 alpha. *Nature (London)*. 2008;451:1008

105. Brechot N, Gomez E, Bignon M, et al. Modulation of macrophage activation state protects tissue from necrosis during critical limb ischemia in thrombospondin-1-deficient mice. *PLoS One*. 2008;3:e3950
106. Dokun A, Keum S, Hazarika S, Li Y, Lamonte GM, Wheeler F, Marchuk DA, Annex BH. A quantitative trait locus (Isq-1) on mouse chromosome 7 is linked to the absence of tissue loss after surgical hindlimb ischemia. *Circulation*. 2008;117:1207-1215
107. Dufourcq P, Leroux L, Ezan J, Descamps B, Lamaziere J-MD, Costet P, Basoni C, Moreau C, Deutsch U, Couffinhall T, Duplaa C. Regulation of endothelial cell cytoskeletal reorganization by a secreted frizzled-related protein-1 and frizzled 4-and frizzled 7-dependent pathway. *American Journal of Pathology*. 2008;172:37-49
108. Hardy B, Battler A, Weiss C, Kudasi O, Raiter A. Therapeutic angiogenesis of mouse hind limb ischemia by novel peptide activating grp78 receptor on endothelial cells. *Biochemical Pharmacology*. 2008;75:891-899
109. Hazarika S, Angelo M, Li Y, Aldrich AJ, Odronic SI, Yan Z, Stamler JS, Annex BH. Myocyte specific overexpression of myoglobin impairs angiogenesis after hind-limb ischemia. *Arteriosclerosis Thrombosis and Vascular Biology*. 2008;28:2144
110. Huang P-H, Sata M, Nishimatsu H, Sumi M, Hirata Y, Nagai R. Pioglitazone ameliorates endothelial dysfunction and restores ischemia-induced angiogenesis in diabetic mice. *Biomedicine & Pharmacotherapy*. 2008;62:46-52
111. Huang Y, Marui A, Sakaguchi H, Esaki J, Arai Y, Hirose K, Bir SC, Horiuchi H, Maruyama T, Ikeda T, Tabata Y, Komeda M. Sustained release of prostaglandin e1 potentiates the impaired therapeutic angiogenesis by basic fibroblast growth factor in diabetic murine hindlimb ischemia. *Circulation Journal*. 2008;72:1693-1699
112. Kang SW, Lim HW, Seo SW, Jeon O, Lee M, Kim BS. Nanosphere-mediated delivery of vascular endothelial growth factor gene for therapeutic angiogenesis in mouse ischemic limbs. *Biomaterials*. 2008;29:1109-1117
113. Krankel N, Katare RG, Siragusa M, et al. Role of kinin b2 receptor signaling in the recruitment of circulating progenitor cells with neovascularization potential. *Circulation Research*. 2008;103:1335-1343
114. Kubo M, Li TS, Suzuki R, Shirasawa B, Morikage N, Ohshima M, Qin SL, Hamano K. Hypoxic preconditioning increases survival and angiogenic potency of peripheral blood mononuclear cells via oxidative stress resistance. *Am J Physiol Heart Circ Physiol*. 2008;294:H590-595
115. Kumar D, Branch BG, Pattillo CB, Hood J, Thoma S, Simpson S, Illum S, Arora N, Chidlow JH, Jr., Langston W, Teng X, Lefer DJ, Patel RP, Kevil CG. Chronic sodium nitrite therapy augments ischemia-induced angiogenesis and arteriogenesis. *Proceedings of the National Academy of Sciences of the United States of America*. 2008;105:7540-7545
116. Kwon S-M, Eguchi M, Wada M, Iwami Y, Hozumi K, Iwaguro H, Masuda H, Kawamoto A, Asahara T. Specific jagged-1 signal from bone marrow microenvironment is required for endothelial progenitor cell development for neovascularization. *Circulation*. 2008;118:157-165
117. Li P, Kondo T, Numaguchi Y, Kobayashi K, Aoki M, Inoue N, Okumura K, Murohara T. Role of bradykinin, nitric oxide, and angiotensin ii type 2 receptor in imidapril-induced angiogenesis. *Hypertension (Baltimore)*. 2008;51:252-258
118. Madeddu P, Kraenkel N, Barcelos LS, Siragusa M, Campagnolo P, Oikawa A, Caporali A, Herman A, Azzolino O, Barberis L, Perino A, Damilano F, Emanuelli C, Hirsch E. Phosphoinositide 3-kinase gamma gene knockout impairs postischemic neovascularization and endothelial progenitor cell functions. *Arteriosclerosis Thrombosis and Vascular Biology*. 2008;28:68-76
119. Moribe K, Nomizu N, Izukura S, Yamamoto K, Tozuka Y, Sakurai M, Ishida A, Nishida H, Miyazaki M. Physicochemical, morphological and therapeutic evaluation of agarose

- hydrogel particles as a reservoir for basic fibroblast growth factor. *Pharmaceutical Development and Technology*. 2008;13:541-547
120. Nakamura Y, Patrushev N, Inomata H, Mehta D, Urao N, Kim HW, Razvi M, Kini V, Mahadev K, Goldstein BJ, McKinney R, Fukai T, Ushio-Fukai M. Role of protein tyrosine phosphatase 1b in vascular endothelial growth factor signaling and cell-cell adhesions in endothelial cells. *Circulation Research*. 2008;102:1182-1191
  121. Napoli C, Williams-Ignarro S, Byrns R, et al. Therapeutic targeting of the stem cell niche in experimental hindlimb ischemia. *Nat. Clin. Pract. Cardiovasc. Med*. 2008;5:571-579
  122. Ouchi N, Oshima Y, Ohashi K, Higuchi A, Ikegami C, Izumiya Y, Walsh K. Follistatin-like 1, a secreted muscle protein, promotes endothelial cell function and revascularization in ischemic tissue through a nitric-oxide synthase-dependent mechanism. *Journal of Biological Chemistry*. 2008;283:32802-32811
  123. Oyama O, Sugimoto N, Qi X, Takuwa N, Mizugishi K, Koizumi J, Takuwa Y. The lysophospholipid mediator sphingosine-1-phosphate promotes angiogenesis in vivo in ischaemic hindlimbs of mice. *Cardiovascular Research*. 2008;78:301-307
  124. Shao H, Tan Y, Eton D, Yang Z, Uberti MG, Li S, Schulick A, Yu H. Statin and stromal cell-derived factor-1 additively promote angiogenesis by enhancement of progenitor cells incorporation into new vessels. *Stem Cells (Miami)*. 2008;26:1376-1384
  125. Suarez Y, Fernandez-Hernando C, Yu J, Gerber SA, Harrison KD, Pober JS, Iruela-Arispe ML, Merkenschlager M, Sessa WC. Dicer-dependent endothelial micRNAs are necessary for postnatal angiogenesis. *Proceedings of the National Academy of Sciences of the United States of America*. 2008;105:14082-14087
  126. Tressel SL, Kim H, Ni C-W, Chang K, Velasquez-Castano JC, Taylor WR, Yoon Y-s, Jo H. Angiotensin-2 stimulates blood flow recovery after femoral artery occlusion by inducing inflammation and arteriogenesis. *Arteriosclerosis Thrombosis and Vascular Biology*. 2008;28:1989
  127. Urao N, Inomata H, Razvi M, Kim HW, Wary K, McKinney R, Fukai T, Ushio-Fukai M. Role of nox2-based nadph oxidase in bone marrow and progenitor cell function involved in neovascularization induced by hindlimb ischemia. *Circulation Research*. 2008;103:212-220
  128. Wang C-Y, Wen M-S, Wang H-W, Hsieh IC, Li Y, Liu P-Y, Lin F-C, Liao JK. Increased vascular senescence and impaired endothelial progenitor cell function mediated by mutation of circadian gene per2. *Circulation*. 2008;118:2166-2173
  129. Willmann JK, Chen K, Wang H, Paulmurugan R, Rollins M, Cai W, Wang DS, Chen IY, Gheysens O, Rodriguez-Porcel M, Chen X, Gambhir SS. Monitoring of the biological response to murine hindlimb ischemia with cu-64-labeled vascular endothelial growth factor-121 positron emission tomography. *Circulation*. 2008;117:915-922
  130. Yang Y, Tang G, Yan J, Park B, Hoffman A, Tie G, Wang R, Messina LM. Cellular and molecular mechanism regulating blood flow recovery in acute versus gradual femoral artery occlusion are distinct in the mouse. *Journal of Vascular Surgery*. 2008;48:1546-1558
  131. Zhang HK, Zhang N, Li M, Feng H, Jin W, Zhao H, Chen XD, Tian L. Therapeutic angiogenesis of bone marrow mononuclear cells (mncs) and peripheral blood mncs: Transplantation for ischemic hindlimb. *Ann. Vasc. Surg*. 2008;22:238-247
  132. Bir SC, Esaki J, Marui A, Yamahara K, Tsubota H, Ikeda T, Sakata R. Angiogenic properties of sustained release platelet-rich plasma: Characterization in-vitro and in the ischemic hind limb of the mouse. *Journal of Vascular Surgery*. 2009;50:870-879
  133. Biscetti F, Straface G, Arena V, Stigliano E, Pecorini G, Rizzo P, De Angelis G, Iuliano L, Ghirlanda G, Flex A. Pioglitazone enhances collateral blood flow in ischemic hindlimb of diabetic mice through an akt-dependent vegf-mediated mechanism, regardless of ppar gamma stimulation. *Cardiovasc. Diabetol*. 2009;8:8
  134. Cho WG, Albuquerque RJC, Kleinman ME, Tarallo V, Greco A, Nozaki M, Green MG, Baffi JZ, Ambati BK, De Falco M, Alexander JS, Brunetti A, De Falco S, Ambati J. Small

- interfering rna-induced tlr3 activation inhibits blood and lymphatic vessel growth. *Proceedings of the National Academy of Sciences of the United States of America*. 2009;106:7137-7142
135. Dai S, He Y, Zhang H, Yu L, Wan T, Xu Z, Jones D, Chen H, Min W. Endothelial-specific expression of mitochondrial thioredoxin promotes ischemia-mediated arteriogenesis and angiogenesis. *Arteriosclerosis Thrombosis and Vascular Biology*. 2009;29:495-502
  136. Dussault S, Maingrette F, Menard C, Michaud S-E, Haddad P, Groleau J, Turgeon J, Perez G, Rivard A. Sildenafil increases endothelial progenitor cell function and improves ischemia-induced neovascularization in hypercholesterolemic apolipoprotein e-deficient mice. *Hypertension (Baltimore)*. 2009;54:1043
  137. Esaki J, Sakaguchi H, Marui A, Bir SC, Arai Y, Huang Y, Tsubota H, Kanaji T, Ikeda T, Sakata R. Local sustained release of prostaglandin e1 induces neovascularization in murine hindlimb ischemia. *Circulation Journal*. 2009;73:1330-1336
  138. Gan L, Matsuura H, Ichiki T, Yin XH, Miyazaki R, Hashimoto T, Cui J, Takeda K, Sunagawa K. Improvement of neovascularization capacity of bone marrow mononuclear cells from diabetic mice by ex vivo pretreatment with resveratrol. *Hypertens. Res*. 2009;32:542-547
  139. Haddad P, Dussault S, Groleau J, Turgeon J, Michaud S-E, Menard C, Perez G, Maingrette F, Rivard A. Nox2-containing nadph oxidase deficiency confers protection from hindlimb ischemia in conditions of increased oxidative stress. *Arteriosclerosis Thrombosis and Vascular Biology*. 2009;29:1522
  140. Izumi Y, Shiota M, Kusakabe H, Hikita Y, Nakao T, Nakamura Y, Muro T, Miura K, Yoshiyama M, Iwao H. Pravastatin accelerates ischemia-induced angiogenesis through amp-activated protein kinase. *Hypertens. Res*. 2009;32:675-679
  141. Kang L, Chen Q, Wang L, Gao L, Meng K, Chen J, Ferro A, Xu B. Decreased mobilization of endothelial progenitor cells contributes to impaired neovascularization in diabetes. *Clinical and Experimental Pharmacology and Physiology*. 2009;36:e47-e56
  142. Kim M-S, Lee C-S, Hur J, et al. Priming with angiopoietin-1 augments the vasculogenic potential of the peripheral blood stem cells mobilized with granulocyte colony-stimulating factor through a novel tie2/ets-1 pathway. *Circulation*. 2009;120:2240
  143. Kondo K, Shintani S, Shibata R, Murakami H, Murakami R, Imaizumi M, Kitagawa Y, Murohara T. Implantation of adipose-derived regenerative cells enhances ischemia-induced angiogenesis. *Arteriosclerosis Thrombosis and Vascular Biology*. 2009;29:61
  144. Kondo M, Shibata R, Miura R, Shimano M, Kondo K, Li P, Ohashi T, Kihara S, Maeda N, Walsh K, Ouchi N, Murohara T. Caloric restriction stimulates revascularization in response to ischemia via adiponectin-mediated activation of endothelial nitric-oxide synthase. *Journal of Biological Chemistry*. 2009;284:1718-1724
  145. Kubo M, Egashira K, Inoue T, Koga J-i, Oda S, Chen L, Nakano K, Matoba T, Kawashima Y, Hara K, Tsujimoto H, Sueishi K, Tominaga R, Sunagawa K. Therapeutic neovascularization by nanotechnology-mediated cell-selective delivery of pitavastatin into the vascular endothelium. *Arteriosclerosis Thrombosis and Vascular Biology*. 2009;29:796
  146. Lee SW, Youn SW, Kim TY, Suh JW, Koh GY, Kwon YW, Chae IH, Park YB, Kim HS. Angiopoietin-1 protects endothelial cells from hypoxia-induced apoptosis via inhibition of phosphatase and tensin homologue deleted from chromosome ten. *Korean Circ. J*. 2009;39:57-65
  147. Nishikawa T, Nakagami H, Maeda A, Morishita R, Miyazaki N, Ogawa T, Tabata Y, Kikuchi Y, Hayashi H, Tatsu Y, Yumoto N, Tamai K, Tomono K, Kaneda Y. Development of a novel antimicrobial peptide, ag-30, with angiogenic properties. *Journal of Cellular and Molecular Medicine*. 2009;13:535-546
  148. Ohashi K, Ouchi N, Sato K, Higuchi A, Ishikawa T-o, Herschman HR, Kihara S, Walsh K. Adiponectin promotes revascularization of ischemic muscle through a cyclooxygenase 2-dependent mechanism. *Molecular and Cellular Biology*. 2009;29:3487-3499

149. Onimaru M, Yonemitsu Y, Fujii T, Tanii M, Nakano T, Nakagawa K, Kohno R-i, Hasegawa M, Nishikawa S-i, Sueishi K. Vegf-c regulates lymphangiogenesis and capillary stability by regulation of pdgf-b. *American Journal of Physiology - Heart and Circulatory Physiology*. 2009;297:H1685-H1696
150. Oses P, Renault M-A, Chauvel R, Leroux L, Allieres C, Seguy B, Lamaziere J-MD, Dufourcq P, Couffinhal T, Duplaa C. Mapping 3-dimensional neovessel organization steps using micro-computed tomography in a murine model of hindlimb ischemia-brief report. *Arteriosclerosis Thrombosis and Vascular Biology*. 2009;29:2090
151. Rayssac A, Neveu C, Pucelle M, Van den Berghe L, Prado-Lourenco L, Arnal JF, Chaffour X, Prats AC. Ires-based vector coexpressing fgf2 and cyr61 provides synergistic and safe therapeutics of lower limb ischemia. *Molecular Therapy*. 2009;17:2010-2019
152. Sanada F, Taniyama Y, Azuma J, Iekushi K, Dosaka N, Yokoi T, Koibuchi N, Kusunoki H, Aizawa Y, Morishita R. Hepatocyte growth factor, but not vascular endothelial growth factor, attenuates angiotensin ii-induced endothelial progenitor cell senescence. *Hypertension*. 2009;53:77-U137
153. Schgoer W, Theurl M, Jeschke J, et al. Gene therapy with the angiogenic cytokine secretoneurin induces therapeutic angiogenesis by a nitric oxide-dependent mechanism. *Circulation Research*. 2009;105:994
154. Shiba Y, Takahashi M, Hata T, Murayama H, Morimoto H, Ise H, Nagasawa T, Ikeda U. Bone marrow cxcr4 induction by cultivation enhances therapeutic angiogenesis. *Cardiovascular Research*. 2009;81:169-177
155. Shmilovich H, Ben-Shoshan J, Tal R, Afek A, Barshack I, Maysel-Auslander S, Harats D, Keren G, George J. B-type natriuretic peptide enhances vasculogenesis by promoting number and functional properties of early endothelial progenitor cells. *Tissue Engineering Part A*. 2009;15:2741-2749
156. Yan J, Tie G, Park B, Yan Y, Nowicki PT, Messina LM. Recovery from hind limb ischemia is less effective in type 2 than in type 1 diabetic mice: Roles of endothelial nitric oxide synthase and endothelial progenitor cells. *Journal of Vascular Surgery*. 2009;50:1412-1422
157. Yang Y-g, Guan H, Lru C-w, Li Y-j. Myoglobin over-expression attenuates angiogenic response in hindlimb ischemia in mice. *Chinese Medical Journal (English Edition)*. 2009;122:1056-1060
158. Yu J, Fernandez-Hernando C, Suarez Y, Schleicher M, Hao Z, Wright PL, DiLorenzo A, Kyriakides TR, Sessa WC. Reticulon 4b (nogo-b) is necessary for macrophage infiltration and tissue repair. *Proceedings of the National Academy of Sciences of the United States of America*. 2009;106:17511-17516
159. Zhou T, Hu Z-H, Zhou B, Fu W-G, Wang Y-Q. B16-f10 melanoma cells and cell culture supernatant enhance angiogenesis in mouse ischemic limb. *Shengli Xuebao*. 2009;61:139-145
160. Balestrieri ML, Lu S-J, de Nigris F, et al. Therapeutic angiogenesis in diabetic apolipoprotein e-deficient mice using bone marrow cells, functional hemangioblasts and metabolic intervention. *Atherosclerosis*. 2010;209:403-414
161. Biscetti F, Straface G, De Cristofaro R, Lancellotti S, Rizzo P, Arena V, Stigliano E, Pecorini G, Egashira K, De Angelis G, Ghirlanda G, Flex A. High-mobility group box-1 protein promotes angiogenesis after peripheral ischemia in diabetic mice through a vegf-dependent mechanism. *Diabetes*. 2010;59:1496-1505
162. Cheng XW, Kuzuya M, Kim W, Song H, Hu L, Inoue A, Nakamura K, Di Q, Sasaki T, Tsuzuki M, Shi GP, Okumura K, Murohara T. Exercise training stimulates ischemia-induced neovascularization via phosphatidylinositol 3-kinase/akt-dependent hypoxia-induced factor-1 alpha reactivation in mice of advanced age. *Circulation*. 2010;122:707-716

163. Ichihara S, Yamada Y, Liu F, Murohara T, Itoh K, Yamamoto M, Ichihara G. Ablation of the transcription factor nrf2 promotes ischemia-induced neovascularization by enhancing the inflammatory response. *Arteriosclerosis Thrombosis and Vascular Biology*. 2010;30:1553
164. Kidoya H, Naito H, Takakura N. Apelin induces enlarged and nonleaky blood vessels for functional recovery from ischemia. *Blood*. 2010;115:3166-3174
165. Kim H, Cho H-J, Kim S-W, Liu B, Choi YJ, Lee J, Sohn Y-D, Lee M-Y, Houge MA, Yoon Y-s. Cd31(+) cells represent highly angiogenic and vasculogenic cells in bone marrow novel role of nonendothelial cd31(+) cells in neovascularization and their therapeutic effects on ischemic vascular disease. *Circulation Research*. 2010;107:602
166. Konishi H, Wu J, Cooke JP. Chronic exposure to nicotine impairs cholinergic angiogenesis. *Vasc. Med*. 2010;15:47-54
167. Leroux L, Descamps B, Tojais NF, Seguy B, Oses P, Moreau C, Daret D, Ivanovic Z, Boiron J-M, Lamaziere J-MD, Dufourcq P, Couffignal T, Duplaa C. Hypoxia preconditioned mesenchymal stem cells improve vascular and skeletal muscle fiber regeneration after ischemia through a wnt4-dependent pathway. *Molecular Therapy*. 2010;18:1545-1552
168. Li P, Shibata R, Maruyama S, Kondo M, Ohashi K, Ouchi N, Murohara T. Fenofibrate promotes ischemia-induced revascularization through the adiponectin-dependent pathway. *American Journal of Physiology - Endocrinology and Metabolism*. 2010;299:E560-E566
169. Li Y, Zhang D, Zhang Y, He G, Zhang F. Augmentation of neovascularization in murine hindlimb ischemia by combined therapy with simvastatin and bone marrow-derived mesenchymal stem cells transplantation. *Journal of Biomedical Science*. 2010;17:75
170. Liu X, Li Y, Liu Y, Luo Y, Wang D, Annex BH, Goldschmidt-Clermont PJ. Endothelial progenitor cells (epcs) mobilized and activated by neurotrophic factors may contribute to pathologic neovascularization in diabetic retinopathy. *American Journal of Pathology*. 2010;176:504-515
171. Luo Y, Xu Z, Wan T, He Y, Jones D, Zhang H, Min W. Endothelial-specific transgenesis of tnfr2 promotes adaptive arteriogenesis and angiogenesis. *Arteriosclerosis Thrombosis and Vascular Biology*. 2010;30:1307
172. Moriya J, Minamino T, Tateno K, Okada S, Uemura A, Shimizu I, Yokoyama M, Nojima A, Okada M, Koga H, Komuro I. Inhibition of semaphorin as a novel strategy for therapeutic angiogenesis. *Circulation Research*. 2010;106:391
173. Ohki M, Ohki Y, Ishihara M, et al. Tissue type plasminogen activator regulates myeloid-cell dependent neoangiogenesis during tissue regeneration. *Blood*. 2010;115:4302-4312
174. Oshikawa J, Urao N, Kim HW, Kaplan N, Razvi M, McKinney R, Poole LB, Fukai T, Ushio-Fukai M. Extracellular sod-derived h2o2 promotes vegf signaling in caveolae/lipid rafts and post-ischemic angiogenesis in mice. *PLoS One*. 2010;5:e10189
175. Qi X, Okamoto Y, Murakawa T, Wang F, Oyama O, Ohkawa R, Yoshioka K, Du W, Sugimoto N, Yatomi Y, Takuwa N, Takuwa Y. Sustained delivery of sphingosine-1-phosphate using poly(lactic-co-glycolic acid)-based microparticles stimulates akt/erk-enos mediated angiogenesis and vascular maturation restoring blood flow in ischemic limbs of mice. *European Journal of Pharmacology*. 2010;634:121-131
176. Shiota M, Kusakabe H, Izumi Y, Hikita Y, Nakao T, Funae Y, Miura K, Iwao H. Heat shock cognate protein 70 is essential for akt signaling in endothelial function. *Arteriosclerosis Thrombosis and Vascular Biology*. 2010;30:491-U279
177. Sun Q, Silva EA, Wang A, Fritton JC, Mooney DJ, Schaffler MB, Grossman PM, Rajagopalan S. Sustained release of multiple growth factors from injectable polymeric system as a novel therapeutic approach towards angiogenesis. *Pharmaceutical Research (Dordrecht)*. 2010;27:264-271
178. Tawa H, Rikitake Y, Takahashi M, Amano H, Miyata M, Satomi-Kobayashi S, Kinugasa M, Nagamatsu Y, Majima T, Ogita H, Miyoshi J, Hirata K, Takai Y. Role of afadin in vascular

- endothelial growth factor- and sphingosine 1-phosphate-induced angiogenesis. *Circulation Research*. 2010;106:1731-1742
179. Theurl M, Schgoer W, Albrecht K, et al. The neuropeptide catestatin acts as a novel angiogenic cytokine via a basic fibroblast growth factor-dependent mechanism. *Circulation Research*. 2010;107:1326
  180. Turgeon J, Dussault S, Haddad P, Groleau J, Menard C, Michaud S-E, Maingrette F, Rivard A. Probucol and antioxidant vitamins rescue ischemia-induced neovascularization in mice exposed to cigarette smoke: Potential role of endothelial progenitor cells. *Atherosclerosis*. 2010;208:342-349
  181. Urao N, Razvi M, Oshikawa J, McKinney RD, Chavda R, Bahou WF, Fukai T, Ushio-Fukai M. Iqgap1 is involved in post-ischemic neovascularization by regulating angiogenesis and macrophage infiltration. *Plos One*. 2010;5:12
  182. Venkatesh PK, Pattillo CB, Branch B, Hood J, Thoma S, Illum S, Pardue S, Teng X, Patel RP, Kevil CG. Dipyridamole enhances ischaemia-induced arteriogenesis through an endocrine nitrite/nitric oxide-dependent pathway. *Cardiovascular Research*. 2010;85:661-670
  183. West XZ, Malinin NL, Merkulova AA, Tischenko M, Kerr BA, Borden EC, Podrez EA, Salomon RG, Byzova TV. Oxidative stress induces angiogenesis by activating tlr2 with novel endogenous ligands. *Nature (London)*. 2010;467:972
  184. Bir SC, Esaki J, Marui A, Sakaguchi H, Kevil CG, Ikeda T, Komeda M, Tabata Y, Sakata R. Therapeutic treatment with sustained-release platelet-rich plasma restores blood perfusion by augmenting ischemia-induced angiogenesis and arteriogenesis in diabetic mice. *Journal of Vascular Research*. 2011;48:195-205
  185. Biscetti F, Pitocco D, Straface G, Zaccardi F, De Cristofaro R, Rizzo P, Lancellotti S, Arena V, Stigliano E, Musella T, Ghirlanda G, Flex A. Glycaemic variability affects ischaemia-induced angiogenesis in diabetic mice. *Clinical Science (London)*. 2011;121:555-564
  186. Cilek MZ, Hirohata S, Hatipoglu OF, Ogawa H, Miyoshi T, Inagaki J, Ohtsuki T, Harada H, Kamikawa S, Kusachi S, Ninomiya Y. Ahr, a novel acute hypoxia-response sequence, drives reporter gene expression under hypoxia in vitro and in vivo. *Cell Biology International*. 2011;35:1-8
  187. Craige SM, Chen K, Pei Y, Li C, Huang X, Chen C, Shibata R, Sato K, Walsh K, Keaney JF, Jr. NADPH oxidase 4 promotes endothelial angiogenesis through endothelial nitric oxide synthase activation. *Circulation*. 2011;124:731
  188. Dong L, Kang L, Ding L, Chen Q, Bai J, Gu R, Li L, Xu B. Insulin modulates ischemia-induced endothelial progenitor cell mobilization and neovascularization in diabetic mice. *Microvascular Research*. 2011;82:227-236
  189. Fang JS, Angelov SN, Simon AM, Burt JM. Cx37 deletion enhances vascular growth and facilitates ischemic limb recovery. *American Journal of Physiology - Heart and Circulatory Physiology*. 2011;301:H1872-H1881
  190. Feng W, Madajka M, Kerr BA, Mahabeleshwar GH, Whiteheart SW, Byzova TV. A novel role for platelet secretion in angiogenesis: Mediating bone marrow-derived cell mobilization and homing. *Blood*. 2011;117:3893-3902
  191. Frontini MJ, Nong Z, Gros R, Drangova M, O'Neil C, Rahman MN, Akawi O, Yin H, Ellis CG, Pickering JG. Fibroblast growth factor 9 delivery during angiogenesis produces durable, vaso-responsive microvessels wrapped by smooth muscle cells. *Nature Biotechnology*. 2011;29:421
  192. Gherghe CM, Duan JZ, Gong JC, Rojas M, Klauber-Demore N, Majesky M, Deb A. Wnt1 is a proangiogenic molecule, enhances human endothelial progenitor function, and increases blood flow to ischemic limbs in a hgf-dependent manner. *Faseb Journal*. 2011;25:1836-1843



193. Glaser-Gabay L, Raiter A, Battler A, Hardy B. Endothelial cell surface vimentin binding peptide induces angiogenesis under hypoxic/ischemic conditions. *Microvascular Research*. 2011;82:221-226
194. Haddad P, Dussault S, Groleau J, Turgeon J, Maingrette F, Rivard A. Nox2-derived reactive oxygen species contribute to hypercholesterolemia-induced inhibition of neovascularization: Effects on endothelial progenitor cells and mature endothelial cells. *Atherosclerosis*. 2011;217:340-349
195. Hata T, Takahashi M, Hida S, Kawaguchi M, Kashima Y, Usui F, Morimoto H, Nishiyama A, Izawa A, Koyama J, Iwakura Y, Taki S, Ikeda U. Critical role of th17 cells in inflammation and neovascularization after ischaemia. *Cardiovascular Research*. 2011;90:364-372
196. Hellingman AA, Zwaginga JJ, van Beem RT, Hamming JF, Fibbe WE, Quax PHA, Geutskens SB, Te RMSMC. T-cell-pre-stimulated monocytes promote neovascularisation in a murine hind limb ischaemia model. *Eur. J. Vasc. Endovasc. Surg*. 2011;41:418-428
197. Hodara R, Weiss D, Joseph G, Velasquez-Castano JC, Landazuri N, Han JW, Yoon Y-s, Taylor WR. Overexpression of catalase in myeloid cells causes impaired postischemic neovascularization. *Arteriosclerosis Thrombosis and Vascular Biology*. 2011;31:2203
198. Ikeda Y, Tajima S, Yoshida S, Yamano N, Kihira Y, Ishizawa K, Aihara K-i, Tomita S, Tsuchiya K, Tamaki T. Deferoxamine promotes angiogenesis via the activation of vascular endothelial cell function. *Atherosclerosis*. 2011;215:339-347
199. Kikuchi R, Takeshita K, Uchida Y, Kondo M, Cheng XW, Nakayama T, Yamamoto K, Matsushita T, Liao JK, Murohara T. Pitavastatin-induced angiogenesis and arteriogenesis is mediated by notch1 in a murine hindlimb ischemia model without induction of vegf. *Laboratory Investigation*. 2011;91:691-703
200. Kwon S-M, Lee Y-K, Yokoyama A, Jung S-Y, Masuda H, Kawamoto A, Lee YM, Asahara T. Differential activity of bone marrow hematopoietic stem cell subpopulations for epc development and ischemic neovascularization. *Journal of Molecular and Cellular Cardiology*. 2011;51:308-317
201. Liu Y, Pressly ED, Abendschein DR, Hawker CJ, Woodard GE, Woodard PK, Welch MJ. Targeting angiogenesis using a c-type atrial natriuretic factor-conjugated nanoprobe and pet. *Journal of Nuclear Medicine*. 2011;52:1956-1963
202. Lu Y, Xiong Y, Huo Y, et al. Grb-2-associated binder 1 (gab1) regulates postnatal ischemic and vegf-induced angiogenesis through the protein kinase a-endothelial nos pathway. *Proceedings of the National Academy of Sciences of the United States of America*. 2011;108:2957-2962
203. Murakami M, Nguyen LT, Hatanaka K, Schachterle W, Chen PY, Zhuang ZW, Black BL, Simons M. Fgf-dependent regulation of vegf receptor 2 expression in mice. *Journal of Clinical Investigation*. 2011;121:2668-2678
204. Palladino M, Gatto I, Neri V, Straino S, Silver M, Tritarelli A, Piccioni A, Smith RC, Gaetani E, Losordo DW, Crea F, Capogrossi M, Pola R. Pleiotropic beneficial effects of sonic hedgehog gene therapy in an experimental model of peripheral limb ischemia. *Molecular Therapy*. 2011;19:658-666
205. Pattillo CB, Bir SC, Branch BG, Greber E, Shen X, Pardue S, Patel RP, Kevil CG. Dipyridamole reverses peripheral ischemia and induces angiogenesis in the db/db diabetic mouse hind-limb model by decreasing oxidative stress. *Free Radical Biology & Medicine*. 2011;50:262-269
206. Rao X, Zhong J, Zhang S, Zhang Y, Yu Q, Yang P, Wang M-H, Fulton DJ, Shi H, Dong Z, Wang D, Wang C-Y. Loss of methyl-cpg-binding domain protein 2 enhances endothelial angiogenesis and protects mice against hind-limb ischemic injury. *Circulation*. 2011;123:2964

207. Rokutanda T, Izumiya Y, Miura M, et al. Passive exercise using whole-body periodic acceleration enhances blood supply to ischemic hindlimb. *Arteriosclerosis Thrombosis and Vascular Biology*. 2011;31:2872
208. Segers VFM, Revin V, Wu W, Qiu H, Yan Z, Lee RT, Sandrasagra A. Protease-resistant stromal cell-derived factor-1 for the treatment of experimental peripheral artery disease. *Circulation*. 2011;123:1306
209. Shao H, Xu Q, Wu Q, Ma Q, Salgueiro L, Wang JA, Eton D, Webster KA, Yu H. Defective cxcr4 expression in aged bone marrow cells impairs vascular regeneration. *Journal of Cellular and Molecular Medicine*. 2011;15:2046-2056
210. Singh NK, Kundumani-Sridharan V, Rao GN. 12/15-lipoxygenase gene knockout severely impairs ischemia-induced angiogenesis due to lack of rac1 farnesylation. *Blood*. 2011;118:5701-5712
211. Spinetti G, Fortunato O, Cordella D, Portararo P, Krankel N, Katare R, Sala-Newby GB, Richer C, Vincent MP, Alhenc-Gelas F, Tonolo G, Cherchi S, Emanuelli C, Madeddu P. Tissue kallikrein is essential for invasive capacity of circulating proangiogenic cells. *Circulation Research*. 2011;108:284-293
212. Tekabe Y, Shen XP, Luma J, Weisenberger D, Yan SF, Haubner R, Schmidt AM, Johnson L. Imaging the effect of receptor for advanced glycation endproducts on angiogenic response to hindlimb ischemia in diabetes. *EJNMMI Res*. 2011;1:9
213. Wara AK, Foo S, Croce K, et al. Tgf-beta 1 signaling and kruppel-like factor 10 regulate bone marrow-derived proangiogenic cell differentiation, function, and neovascularization. *Blood*. 2011;118:6450-6460
214. Wei X, Schneider JG, Shenouda SM, Lee A, Towler DA, Chakravarthy MV, Vita JA, Semenkovich CF. De novo lipogenesis maintains vascular homeostasis through endothelial nitric-oxide synthase (enos) palmitoylation. *Journal of Biological Chemistry*. 2011;286:2933-2945
215. Xie J, Liao Y, Yang L, Wu J, Liu C, Xuan W, Li M, Zhang L, Liu Y, Wu P, Bin J. Ultrasound molecular imaging of angiogenesis induced by mutant forms of hypoxia-inducible factor-1 alpha. *Cardiovascular Research*. 2011;92:256-266
216. Xu M-J, Song P, Shirwany N, Liang B, Xing J, Viollet B, Wang X, Zhu Y, Zou M-H. Impaired expression of uncoupling protein 2 causes defective postischemic angiogenesis in mice deficient in amp-activated protein kinase alpha subunits. *Arteriosclerosis Thrombosis and Vascular Biology*. 2011;31:1757-1765
217. Youn S-W, Lee S-W, Lee J, Jeong H-K, Suh J-W, Yoon C-H, Kang H-J, Kim H-Z, Koh G-Y, Oh B-H, Park Y-B, Kim H-S. Comp-ang1 stimulates hif-1 alpha-mediated sdf-1 overexpression and recovers ischemic injury through bm-derived progenitor cell recruitment. *Blood*. 2011;117:4376-4386
218. Zhang D, Li Y, Zhu T, Zhang F, Yang Z, Miao D. Zinc supplementation results in improved therapeutic potential of bone marrow-derived mesenchymal stromal cells in a mouse ischemic limb model. *Cytotherapy*. 2011;13:156-164
219. Zhao J, Wang W, Ha CH, Kim JY, Wong C, Redmond EM, Hamik A, Jain MK, Feng G-S, Jin ZG. Endothelial grb2-associated binder 1 is crucial for postnatal angiogenesis. *Arteriosclerosis Thrombosis and Vascular Biology*. 2011;31:1016
220. Bir SC, Kolluru GK, McCarthy P, Shen XG, Pardue S, Pattillo CB, Kevil CG. Hydrogen sulfide stimulates ischemic vascular remodeling through nitric oxide synthase and nitrite reduction activity regulating hypoxia-inducible factor-1 alpha and vascular endothelial growth factor-dependent angiogenesis. *J. Am. Heart Assoc*. 2012;1:17
221. Brenes RA, Jadlowiec CC, Bear M, Hashim P, Protack CD, Li X, Lv W, Collins MJ, Dardik A. Toward a mouse model of hind limb ischemia to test therapeutic angiogenesis. *Journal of Vascular Surgery*. 2012;56:1669-1679

222. Chen YL, Chang CL, Sun CK, Wu CJ, Tsai TH, Chung SY, Chua S, Yeh KH, Leu S, Sheu JJ, Lee FY, Yen CH, Yip HK. Impact of obesity control on circulating level of endothelial progenitor cells and angiogenesis in response to ischemic stimulation. *J. Transl. Med.* 2012;10:11
223. Froemel T, Jungblut B, Hu J, Trouvain C, Barbosa-Sicard E, Popp R, Liebner S, Dimmeler S, Hammock BD, Fleming I. Soluble epoxide hydrolase regulates hematopoietic progenitor cell function via generation of fatty acid diols. *Proceedings of the National Academy of Sciences of the United States of America.* 2012;109:9995-10000
224. Hendgen-Cotta UB, Luedike P, Totzeck M, Kropp M, Schicho A, Stock P, Rammos C, Niessen M, Heiss C, Lundberg JO, Weitzberg E, Kelm M, Rassaf T. Dietary nitrate supplementation improves revascularization in chronic ischemia. *Circulation.* 2012;126:1983
225. Holroyd EW, Delacroix S, Larsen K, Harbuzariu A, Psaltis PJ, Wang L, Pan S, White TA, Witt TA, Kleppe LS, Mueske CS, Mukhopadhyay D, Simari RD. Tissue factor pathway inhibitor blocks angiogenesis via its carboxyl terminus. *Arteriosclerosis Thrombosis and Vascular Biology.* 2012;32:704-711
226. Hori A, Shibata R, Morisaki K, Murohara T, Komori K. Cilostazol stimulates revascularisation in response to ischaemia via an enos-dependent mechanism. *Eur. J. Vasc. Endovasc. Surg.* 2012;43:62-65
227. Huang C-Y, Shih C-M, Tsao N-W, et al. Dipeptidyl peptidase-4 inhibitor improves neovascularization by increasing circulating endothelial progenitor cells. *British Journal of Pharmacology.* 2012;167:1506-1519
228. Huang P-H, Lin C-P, Wang C-H, Chiang C-H, Tsai H-Y, Chen J-S, Lin F-Y, Leu H-B, Wu T-C, Chen J-W, Lin S-J. Niacin improves ischemia-induced neovascularization in diabetic mice by enhancement of endothelial progenitor cell functions independent of changes in plasma lipids. *Angiogenesis.* 2012;15:377-389
229. Ikeda Y, Aihara K-i, Yoshida S, et al. Heparin cofactor ii, a serine protease inhibitor, promotes angiogenesis via activation of the amp-activated protein kinase-endothelial nitric-oxide synthase signaling pathway. *Journal of Biological Chemistry.* 2012;287:34256-34263
230. Kim DS, Kim H, Shim SH, Kim C, Song M, Kim YH, Jung YW, Nam JH. Coxsackievirus b3 used as a gene therapy vector to express functional fgf2. *Gene Therapy.* 2012;19:1159-1165
231. Kito T, Shibata R, Kondo M, Yamamoto T, Suzuki H, Ishii M, Murohara T. Nifedipine ameliorates ischemia-induced revascularization in diet-induced obese mice. *American Journal of Hypertension.* 2012;25:401-406
232. Kubo M, Li T-S, Kurazumi H, Takemoto Y, Ohshima M, Murata T, Katsura S, Morikage N, Furutani A, Haman K. Hypoxic preconditioning enhances angiogenic potential of bone marrow cells with aging-related functional impairment. *Circulation Journal.* 2012;76:986-994
233. Landazuri N, Joseph G, Guldberg RE, Taylor WR. Growth and regression of vasculature in healthy and diabetic mice after hindlimb ischemia. *American Journal of Physiology - Regulatory Integrative and Comparative Physiology.* 2012;303:R48-R56
234. Li R, Ren M, Chen N, Luo M, Zhang Z, Wu J. Vitronectin increases vascular permeability by promoting ve-cadherin internalization at cell junctions. *PLoS One.* 2012;7:e37195
235. Lian LS, Tang F, Yang J, Liu CW, Li YJ. Therapeutic angiogenesis of plga-heparin nanoparticle in mouse ischemic limb. *J. Nanomater.* 2012:6
236. Makarevich P, Tsokolaeva Z, Shevelev A, Rybalkin I, Shevchenko E, Beloglazova I, Vlasik T, Tkachuk V, Parfyonova Y. Combined transfer of human vegf165 and hgf genes renders potent angiogenic effect in ischemic skeletal muscle. *PLoS One.* 2012;7:e38776
237. Maruyama S, Shibata R, Kikuchi R, Izumiya Y, Rokutanda T, Araki S, Kataoka Y, Ohashi K, Daida H, Kihara S, Ogawa H, Murohara T, Ouchi N. Fat-derived factor omentin stimulates

- endothelial cell function and ischemia-induced revascularization via endothelial nitric oxide synthase-dependent mechanism. *Journal of Biological Chemistry*. 2012;287:408-417
238. Matsakas A, Yadav V, Lorca S, Evans RM, Narkar VA. Revascularization of ischemic skeletal muscle by estrogen-related receptor-gamma. *Circulation Research*. 2012;110:1087-1096
239. McClung JM, McCord TJ, Keum S, Johnson S, Annex BH, Marchuk DA, Kontos CD. Skeletal muscle-specific genetic determinants contribute to the differential strain-dependent effects of hindlimb ischemia in mice. *American Journal of Pathology*. 2012;180:2156-2169
240. Mima Y, Fukumoto S, Koyama H, Okada M, Tanaka S, Shoji T, Emoto M, Furuzono T, Nishizawa Y, Inaba M. Enhancement of cell-based therapeutic angiogenesis using a novel type of injectable scaffolds of hydroxyapatite-polymer nanocomposite microspheres. *PLoS One*. 2012;7:e35199
241. Miyauchi T, Miyata M, Ikeda Y, Akasaki Y, Hamada N, Shirasawa T, Furusho Y, Tei C. Waon therapy upregulates hsp90 and leads to angiogenesis through the akt-endothelial nitric oxide synthase pathway in mouse hindlimb ischemia. *Circulation Journal*. 2012;76:1712-1721
242. Miyazaki R, Ichiki T, Hashimoto T, Ikeda J, Kamiharaguchi A, Narabayashi E, Matsuura H, Takeda K, Sunagawa K. Acetylcholinesterase inhibitors attenuate angiogenesis. *Clin. Sci*. 2012;123:241-249
243. Palladino M, Gatto I, Neri V, Stigliano E, Smith RC, Pola E, Straino S, Gaetani E, Capogrossi M, Leone G, Hlatky L, Pola R. Combined therapy with sonic hedgehog gene transfer and bone marrow-derived endothelial progenitor cells enhances angiogenesis and myogenesis in the ischemic skeletal muscle. *Journal of Vascular Research*. 2012;49:425-431
244. Schroeter MR, Stein S, Heida N-M, Leifheit-Nestler M, Cheng IF, Gogiraju R, Christiansen H, Maier LS, Shah AM, Hasenfuss G, Konstantinides S, Schaefer K. Leptin promotes the mobilization of vascular progenitor cells and neovascularization by nox2-mediated activation of mmp9. *Cardiovascular Research*. 2012;93:170-180
245. Tashiro Y, Nishida C, Sato-Kusubata K, et al. Inhibition of pai-1 induces neutrophil-driven neoangiogenesis and promotes tissue regeneration via production of angiocrine factors in mice. *Blood*. 2012;119:6382-6393
246. Turgeon J, Haddad P, Dussault S, Groleau J, Maingrette F, Perez G, Rivard A. Protection against vascular aging in nox2-deficient mice: Impact on endothelial progenitor cells and reparative neovascularization. *Atherosclerosis*. 2012;223:122-129
247. Vaughan EE, Liew A, Mashayekhi K, Dockery P, McDermott J, Kealy B, Flynn A, Duffy A, Coleman C, O'Regan A, Barry FP, O'Brien T. Pretreatment of endothelial progenitor cells with osteopontin enhances cell therapy for peripheral vascular disease. *Cell Transplantation*. 2012;21:1095-1107
248. Yan JL, Tie GD, Wang SY, Messina KE, DiDato S, Guo SJ, Messina LM. Type 2 diabetes restricts multipotency of mesenchymal stem cells and impairs their capacity to augment postischemic neovascularization in db/db mice. *J. Am. Heart Assoc*. 2012;1:16
249. Yang N, Chen P, Tao Z, Zhou N, Gong X, Xu Z, Zhang M, Zhang D, Chen B, Tao Z, Yang Z. Beneficial effects of ginsenoside-rg1 on ischemia-induced angiogenesis in diabetic mice. *Acta Biochimica et Biophysica Sinica*. 2012;44:999-1005
250. Yin K-J, Olsen K, Hamblin M, Zhang J, Schwendeman SP, Chen YE. Vascular endothelial cell-specific microrna-15a inhibits angiogenesis in hindlimb ischemia. *Journal of Biological Chemistry*. 2012;287:27055-27064
251. Zhang Y, Zhang R, Li Y, He G, Zhang D, Zhang F. Simvastatin augments the efficacy of therapeutic angiogenesis induced by bone marrow-derived mesenchymal stem cells in a murine model of hindlimb ischemia. *Molecular Biology Reports*. 2012;39:285-293

252. Aburakawa Y, Kawabe J-i, Okada M, et al. Prostacyclin stimulated integrin-dependent angiogenic effects of endothelial progenitor cells and mediated potent circulation recovery in ischemic hind limb model. *Circulation Journal*. 2013;77:1053-1062
253. Adams GN, Stavrou EX, Fang C, Merkulova A, Alaiti MA, Nakajima K, Morooka T, Merkulov S, LaRusch GA, Simon DI, Jain MK, Schmaier AH. Prolylcarboxypeptidase promotes angiogenesis and vascular repair. *Blood*. 2013;122:1522-1531
254. Biscetti F, Pecorini G, Arena V, Stigliano E, Angelini F, Ghirlanda G, Ferraccioli G, Flex A. Cilostazol improves the response to ischemia in diabetic mice by a mechanism dependent on ppar gamma. *Molecular and Cellular Endocrinology*. 2013;381:80-87
255. Biscetti F, Pecorini G, Straface G, Arena V, Stigliano E, Rutella S, Locatelli F, Angelini F, Ghirlanda G, Flex A. Cilostazol promotes angiogenesis after peripheral ischemia through a vegf-dependent mechanism. *International Journal of Cardiology*. 2013;167:910-916
256. Boering YC, Floegel U, Jacoby C, Heil M, Schaper W, Schrader J. Lack of ecto-5'-nucleotidase (cd73) promotes arteriogenesis. *Cardiovascular Research*. 2013;97:88-96
257. Chavala SH, Kim Y, Tudisco L, et al. Retinal angiogenesis suppression through small molecule activation of p53. *Journal of Clinical Investigation*. 2013;123:4170-4181
258. Di Q, Cheng Z, Kim W, Liu Z, Song H, Li X, Nan Y, Wang C, Cheng X. Impaired cross-activation of beta3 integrin and vegfr-2 on endothelial progenitor cells with aging decreases angiogenesis in response to hypoxia. *International Journal of Cardiology*. 2013;168:2167-2176
259. Fang JS, Angelov SN, Simon AM, Burt JM. Compromised regulation of tissue perfusion and arteriogenesis limit, in an at(1)r-independent fashion, recovery of ischemic tissue in cx40(-/-) mice. *American Journal of Physiology - Heart and Circulatory Physiology*. 2013;304:H816-H827
260. Galasso G, De Rosa R, Ciccarelli M, et al. Beta(2)-adrenergic receptor stimulation improves endothelial progenitor cell-mediated ischemic neoangiogenesis. *Circulation Research*. 2013;112:1026
261. Han J-K, Kim H-L, Jeon K-H, Choi Y-E, Lee H-S, Kwon Y-W, Jang J-J, Cho H-J, Kang H-J, Oh B-H, Park Y-B, Kim H-S. Peroxisome proliferator-activated receptor-delta activates endothelial progenitor cells to induce angio-myogenesis through matrix metallo-proteinase-9-mediated insulin-like growth factor-1 paracrine networks. *European Heart Journal*. 2013;34:1755-1765
262. Huang P-H, Chen C-Y, Lin C-P, Wang C-H, Tsai H-Y, Lo W-Y, Leu H-B, Chen J-W, Lin S-J, Chu P-H. Deletion of fh12 gene impaired ischemia-induced blood flow recovery by modulating circulating proangiogenic cells. *Arteriosclerosis Thrombosis and Vascular Biology*. 2013;33:709
263. Ikeda Y, Tajima S, Izawa-Ishizawa Y, Kihira Y, Ishizawa K, Yoshida S, Aihara K-i, Tsuchiya K, Tamaki T. Bovine milk-derived lactoferrin exerts proangiogenic effects in an src-akt-enos-dependent manner in response to ischemia. *Journal of Cardiovascular Pharmacology*. 2013;61:423-429
264. Jo J-i, Lin X, Nakahara T, Aoki I, Saga T, Tabata Y. Preparation of polymer-based magnetic resonance imaging contrast agent to visualize therapeutic angiogenesis. *Tissue Engineering Part A*. 2013;19:30-39
265. Kuwahara G, Nishinakamura H, Kojima D, Tashiro T, Kodama S. Vascular endothelial growth factor-c derived from cd11b(+) cells induces therapeutic improvements in a murine model of hind limb ischemia. *Journal of Vascular Surgery*. 2013;57:1090-1099
266. Lin Y-W, Huang C-Y, Chen Y-H, Shih C-M, Tsao N-W, Lin C-Y, Chang N-C, Tsai C-S, Tsai H-Y, Tsai J-C, Huang P-H, Li C-Y, Lin F-Y. Groel1, a heat shock protein 60 of chlamydia pneumoniae, impairs neovascularization by decreasing endothelial progenitor cell function. *PLoS One*. 2013;8

267. Meisner JK, Song J, Annex BH, Price RJ. Myoglobin overexpression inhibits reperfusion in the ischemic mouse hindlimb through impaired angiogenesis but not arteriogenesis. *American Journal of Pathology*. 2013;183:1710-1718
268. Most P, Lerchenmueller C, Rengo G, et al. S100a1 deficiency impairs postischemic angiogenesis via compromised proangiogenic endothelial cell function and nitric oxide synthase regulation. *Circulation Research*. 2013;112:66
269. Qin J, Li K, Peng C, Li X, Li J, Ye K, Yang X, Xie Q, Shen Z, Jin Y, Jiang M, Zhang G, Lu X. MRI of iron oxide nanoparticle-labeled adscs in a model of hindlimb ischemia. *Biomaterials*. 2013;34:4914-4925
270. Renault M-A, Chapouly C, Yao Q, et al. Desert hedgehog promotes ischemia-induced angiogenesis by ensuring peripheral nerve survival. *Circulation Research*. 2013;112:762-770
271. Renault M-A, Robbesyn F, Chapouly C, Yao Q, Vandierdonck S, Reynaud A, Belloc I, Traiffort E, Ruat M, Desgranges C, Gadeau A-P. Hedgehog-dependent regulation of angiogenesis and myogenesis is impaired in aged mice. *Arteriosclerosis Thrombosis and Vascular Biology*. 2013;33:2858-2866
272. Schgoer W, Theurl M, Albrecht-Schgoer K, Jonach V, Koller B, Lener D, Franz WM, Kirchmair R. Secretoneurin gene therapy improves blood flow in an ischemia model in type 1 diabetic mice by enhancing therapeutic neovascularization. *PLoS One*. 2013;8:e74029
273. Surni M, Tateishi N, Shibata H, Ohki T, Sata M. Quercetin glucosides promote ischemia-induced angiogenesis, but do not promote tumor growth. *Life Sciences*. 2013;93:814-819
274. Togliatto G, Trombetta A, Dentelli P, Cotogni P, Rosso A, Tschop MH, Granata R, Ghigo E, Brizzi MF. Unacylated ghrelin promotes skeletal muscle regeneration following hindlimb ischemia via sod-2-mediated mir-221/222 expression. *J. Am. Heart Assoc*. 2013;2:21
275. Tsukada S, Kwon S-M, Matsuda T, Jung S-Y, Lee J-H, Lee S-H, Masuda H, Asahara T. Identification of mouse colony-forming endothelial progenitor cells for postnatal neovascularization: A novel insight highlighted by new mouse colony-forming assay. *Stem Cell Research & Therapy*. 2013;4:20
276. Turgeon J, Dussault S, Maingrette F, Groleau J, Haddad P, Perez G, Rivard A. Fish oil-enriched diet protects against ischemia by improving angiogenesis, endothelial progenitor cell function and postnatal neovascularization. *Atherosclerosis*. 2013;229:295-303
277. Urao N, Sudhakar V, Kim S-J, Chen G-F, McKinney RD, Kojda G, Fukai T, Ushio-Fukai M. Critical role of endothelial hydrogen peroxide in post-ischemic neovascularization. *PLoS One*. 2013;8:e57618
278. van den Hengel LG, Hellingman AA, Nossent AY, van Oeveren-Rietdijk AM, de Vries MR, Spek CA, van Zonneveld AJ, Reitsma PH, Hamming JF, de Boer HC, Versteeg HH, Quax PHA. Protease-activated receptor (par)2, but not par1, is involved in collateral formation and anti-inflammatory monocyte polarization in a mouse hind limb ischemia model. *PLoS One*. 2013;8:e61923
279. Wagner N-M, Bierhansl L, Butschkau A, Noeldge-Schomburg G, Roesner JP, Vollmar B. Tlr2-deficiency of ckit(+) bone marrow cells is associated with augmented potency to stimulate angiogenic processes. *International Journal of Clinical and Experimental Pathology*. 2013;6:2813-2823
280. Wagner N-M, Bierhansl L, Noeldge-Schomburg G, Vollmar B, Roesner JP. Toll-like receptor 2-blocking antibodies promote angiogenesis and induce erk1/2 and akt signaling via cxcr4 in endothelial cells. *Arteriosclerosis Thrombosis and Vascular Biology*. 2013;33:1943-1951
281. Xu Y, Zhou Y, Lin H, Hu H, Wang Y, Xu G. Toll-like receptor 2 in promoting angiogenesis after acute ischemic injury. *International Journal of Molecular Medicine*. 2013;31:555-560
282. Yang H-M, Moon S-H, Choi Y-S, Park S-J, Lee Y-S, Lee H-J, Kim S-J, Chung H-M. Therapeutic efficacy of human embryonic stem cell-derived endothelial cells in humanized

- mouse models harboring a human immune system. *Arteriosclerosis Thrombosis and Vascular Biology*. 2013;33:2839-2849
283. Yip H-K, Sun C-K, Tsai T-H, Sheu J-J, Kao Y-H, Lin Y-C, Shiue Y-L, Chen Y-L, Chai H-T, Chua S, Ko S-F, Leu S. Tissue plasminogen activator enhances mobilization of endothelial progenitor cells and angiogenesis in murine limb ischemia. *International Journal of Cardiology*. 2013;168:226-236
284. Yoshida S, Aihara K-i, Ikeda Y, et al. Androgen receptor promotes sex-independent angiogenesis in response to ischemia and is required for activation of vascular endothelial growth factor receptor signaling. *Circulation*. 2013;128:60-71
285. Young JA, Ting KK, Li J, et al. Regulation of vascular leak and recovery from ischemic injury by general and ve-cadherin-restricted mirna antagonists of mir-27. *Blood*. 2013;122:2911-2919
286. Zhou J, Cheng M, Liao Y-H, et al. Rosuvastatin enhances angiogenesis via enos-dependent mobilization of endothelial progenitor cells. *PLoS One*. 2013;8:e63126
287. Ahn GO, Seita J, Hong B-J, Kim Y-E, Bok S, Lee C-J, Kim KS, Lee JC, Leeper NJ, Cooke JP, Kim HJ, Kim IH, Weissman IL, Brown JM. Transcriptional activation of hypoxia-inducible factor-1 (hif-1) in myeloid cells promotes angiogenesis through vegf and s100a8. *Proceedings of the National Academy of Sciences of the United States of America*. 2014;111:2698-2703
288. Amanso AM, Lassegue B, Joseph G, Landazuri N, Long JS, Weiss D, Taylor WR, Griendling KK. Polymerase delta-interacting protein 2 promotes postischemic neovascularization of the mouse hindlimb. *Arteriosclerosis Thrombosis and Vascular Biology*. 2014;34:1548-1555
289. Bir SC, Pattillo CB, Pardue S, Kolluru GK, Shen X, Giordano T, Kevil CG. Nitrite anion therapy protects against chronic ischemic tissue injury in db/db diabetic mice in a no/vegf-dependent manner. *Diabetes*. 2014;63:270-281
290. Boerckel JD, Chandrasekharan UM, Waitkus MS, Tillmaand EG, Bartlett R, DiCorleto PE. Mitogen-activated protein kinase phosphatase-1 promotes neovascularization and angiogenic gene expression. *Arteriosclerosis Thrombosis and Vascular Biology*. 2014;34:1020-1031
291. Chang S-H, Elemento O, Zhang J, Zhuang ZW, Simons M, Hla T. Elavl1 regulates alternative splicing of eif4e transporter to promote postnatal angiogenesis. *Proceedings of the National Academy of Sciences of the United States of America*. 2014;111:18309-18314
292. Chen H, Wang S, Zhang J, et al. A novel molecule me6tren promotes angiogenesis via enhancing endothelial progenitor cell mobilization and recruitment. *Scientific Reports*. 2014;4:6222
293. Diao Y, Lian L, Guo L, Chen H, Chen Y, Song X, Li Y. A vascular endothelial growth factor activating transcription factor increases the endothelial progenitor cells population and induces therapeutic angiogenesis in a type 1 diabetic mouse with hindlimb ischemia. *Chinese Medical Journal (English Edition)*. 2014;127:3623-3629
294. Dokun AO, Chen L, Lanjewar SS, Lye RJ, Annex BH. Glycaemic control improves perfusion recovery and vegfr2 protein expression in diabetic mice following experimental pad. *Cardiovascular Research*. 2014;101:364-372
295. Dunn LL, Simpson PJL, Prosser HC, et al. A critical role for thioredoxin-interacting protein in diabetes-related impairment of angiogenesis. *Diabetes*. 2014;63:675-687
296. Fan S, Xu Y, Li X, Tie L, Pan Y, Li X. Opposite angiogenic outcome of curcumin against ischemia and lewis lung cancer models: In silico, in vitro and in vivo studies. *Biochimica et Biophysica Acta*. 2014;1842:1742-1754
297. Feng Y, Gross S, Wolf NM, Butenschon VM, Qiu Y, Devraj K, Liebner S, Kroll J, Skolnik EY, Hammes HP, Wieland T. Nucleoside diphosphate kinase b regulates angiogenesis through modulation of vascular endothelial growth factor receptor type 2 and endothelial adherens junction proteins. *Arterioscler Thromb Vasc Biol*. 2014;34:2292-2300

298. Hao C, Shintani S, Shimizu Y, Kondo K, Ishii M, Wu H, Murohara T. Therapeutic angiogenesis by autologous adipose-derived regenerative cells: Comparison with bone marrow mononuclear cells. *American Journal of Physiology - Heart and Circulatory Physiology*. 2014;307:H869-H879
299. Hao CN, Huang ZH, Song SW, Shi YQ, Cheng XW, Murohara T, Lu W, Su DF, Duan JL. Arterial baroreflex dysfunction impairs ischemia-induced angiogenesis. *J. Am. Heart Assoc*. 2014;3:12
300. Heo SC, Kwon YW, Jang IH, Jeong GO, Yoon JW, Kim CD, Kwon SM, Bae Y-S, Kim JH. Wkymvm-induced activation of formyl peptide receptor 2 stimulates ischemic neovasclogenesis by promoting homing of endothelial colony-forming cells. *Stem Cells (Miamisburg)*. 2014;32:779-790
301. Holfeld J, Tepekoeylue C, Blunder S, Lobenwein D, Kirchmair E, Dietl M, Kozaryn R, Lener D, Theurl M, Paulus P, Kirchmair R, Grimm M. Low energy shock wave therapy induces angiogenesis in acute hind-limb ischemia via vegf receptor 2 phosphorylation. *PLoS One*. 2014;9:e103982
302. Huang J-J, Shi Y-Q, Li R-L, Hu A, Zhou H-S, Cheng Q, Xu Z, Yang Z-M, Hao C-N, Duan J-L. Angiogenesis effect of therapeutic ultrasound on ischemic hind limb in mice. *American Journal of Translational Research*. 2014;6:703-713
303. Ishii M, Shibata R, Kondo K, Kambara T, Shimizu Y, Tanigawa T, Bando YK, Nishimura M, Ouchi N, Murohara T. Vildagliptin stimulates endothelial cell network formation and ischemia-induced revascularization via an endothelial nitric-oxide synthase-dependent mechanism. *Journal of Biological Chemistry*. 2014;289:27235-27245
304. Ishikura K, Misu H, Kumazaki M, et al. Selenoprotein p as a diabetes-associated hepatokine that impairs angiogenesis by inducing vegf resistance in vascular endothelial cells. *Diabetologia*. 2014;57:1968-1976
305. Jiang Q, Ding S, Wu J, Liu X, Wu Z. Norepinephrine stimulates mobilization of endothelial progenitor cells after limb ischemia. *PLoS One*. 2014;9:e101774
306. Kikuchi R, Nakamura K, MacLauchlan S, et al. An antiangiogenic isoform of vegf-a contributes to impaired vascularization in peripheral artery disease. *Nature Medicine*. 2014;20:1464-1471
307. Kim BR, Jang IH, Shin SH, Kwon YW, Heo SC, Choi E-J, Lee JS, Kim JH. Therapeutic angiogenesis in a murine model of limb ischemia by recombinant periostin and its fasciclin i domain. *Biochimica et Biophysica Acta*. 2014;1842:1324-1332
308. Kohler EE, Baruah J, Urao N, Ushio-Fukai M, Fukai T, Chatterjee I, Wary KK. Low-dose 6-bromindirubin-3'-oxime induces partial dedifferentiation of endothelial cells to promote increased neovascularization. *Stem Cells (Miamisburg)*. 2014;32:1538-1552
309. Kuwahara G, Nishinakamura H, Kojima D, Tashiro T, Kodama S. Gm-csf treated f4/80(+) bmcs improve murine hind limb ischemia similar to m-csf differentiated macrophages. *PLoS One*. 2014;9:e106987
310. Leu S, Lu H-I, Sun C-K, Sheu J-J, Chen Y-L, Tsai T-H, Yeh K-H, Chai H-T, Chua S, Tsai C-Y, Chang H-W, Lee F-Y, Yip H-K. Retention of endothelial progenitor cells in bone marrow in a murine model of endogenous tissue plasminogen activator (tpa) deficiency in response to critical limb ischemia. *International Journal of Cardiology*. 2014;170:394-405
311. Liu J, Fan W, Liu M, Lin X, Wang Y, Wang F, Chen X, Cao F, Liang J. Spatial vascular volume fraction imaging for quantitative assessment of angiogenesis. *Mol Imaging Biol*. 2014;16:362-371
312. Michalik KM, You X, Manavski Y, Doddaballapur A, Zoernig M, Braun T, John D, Ponomareva Y, Chen W, Uchida S, Boon RA, Dimmeler S. Long noncoding rna malat1 regulates endothelial cell function and vessel growth. *Circulation Research*. 2014;114:1389-1397



313. Murdoch CE, Shuler M, Haeussler DJF, Kikuchi R, Bearely P, Han J, Watanabe Y, Fuster JJ, Walsh K, Ho Y-S, Bachschmid MM, Cohen RA, Matsui R. Glutaredoxin-1 up-regulation induces soluble vascular endothelial growth factor receptor 1, attenuating post-ischemia limb revascularization. *Journal of Biological Chemistry*. 2014;289:8633-8644
314. Noh H, Yu MR, Kim HJ, Jang EJ, Hwang ES, Jeon JS, Kwon SH, Han DC. Uremic toxin p-cresol induces akt-pathway-selective insulin resistance in bone marrow-derived mesenchymal stem cells. *Stem Cells (Miamisburg)*. 2014;32:2443-2453
315. Ohashi K, Enomoto T, Joki Y, et al. Neuron-derived neurotrophic factor functions as a novel modulator that enhances endothelial cell function and revascularization processes. *Journal of Biological Chemistry*. 2014;289:14132-14144
316. Parker-Duffen JL, Nakamura K, Silver M, Zuriaga MA, MacLauchlan S, Aprahamian TR, Walsh K. Divergent roles for adiponectin receptor 1 (adipor1) and adipor2 in mediating revascularization and metabolic dysfunction in vivo. *Journal of Biological Chemistry*. 2014;289:16200-16213
317. Prosser HCG, Tan JTM, Dunn LL, Patel S, Vanags LZ, Bao S, Ng MKC, Bursill CA. Multifunctional regulation of angiogenesis by high-density lipoproteins. *Cardiovascular Research*. 2014;101:145-154
318. Semo J, Sharir R, Afek A, Avivi C, Barshack I, Maysel-Auslender S, Krelin Y, Kain D, Entin-Meer M, Keren G, George J. The 106b similar to 25 microrna cluster is essential for neovascularization after hindlimb ischaemia in mice. *European Heart Journal*. 2014;35:3212-3223
319. Sharir R, Semo J, Shaish A, Landa-Rouben N, Entin-Meer M, Keren G, George J. Regulatory t cells influence blood flow recovery in experimental hindlimb ischaemia in an il-10-dependent manner. *Cardiovascular Research*. 2014;103:585-596
320. Shih C-M, Chen Y-H, Yi Wen L, Tsao N-W, Wu S-C, Kao Y-T, Chiang K-H, Li C-Y, Chang N-C, Lin C-Y, Huang C-Y, Lin F-Y. Mk-0626, a dipeptidyl peptidase-4 inhibitor, improves neovascularization by increasing both the number of circulating endothelial progenitor cells and endothelial nitric oxide synthetase expression. *Current Medicinal Chemistry*. 2014;21:2012-2022
321. Tong X, Lv G, Huang J, Min Y, Yang L, Lin PC. Gr-1+cd11b+ myeloid cells efficiently home to site of injury after intravenous administration and enhance diabetic wound healing by neoangiogenesis. *Journal of Cellular and Molecular Medicine*. 2014;18:1194-1202
322. Veeranki S, Givvimani S, Pushpakumar S, Tyagi SC. Hyperhomocysteinemia attenuates angiogenesis through reduction of hif-1 alpha and pgc-1 alpha levels in muscle fibers during hindlimb ischemia. *American Journal of Physiology - Heart and Circulatory Physiology*. 2014;306:H1116-H1127
323. Yamauchi A, Sakurai T, Kamiyoshi A, et al. Functional differentiation of ramp2 and ramp3 in their regulation of the vascular system. *J Mol Cell Cardiol*. 2014;77:73-85
324. Zhu H, Sun A, Zhu H, Li Z, Huang Z, Zhang S, Ma X, Zou Y, Hu K, Ge J. Aldehyde dehydrogenase-2 is a host factor required for effective bone marrow mesenchymal stem cell therapy. *Arteriosclerosis Thrombosis and Vascular Biology*. 2014;34:894-901
325. Zhu H, Sun A, Zou Y, Ge J. Inducible metabolic adaptation promotes mesenchymal stem cell therapy for ischemia a hypoxia-induced and glycogen-based energy prestorage strategy. *Arteriosclerosis Thrombosis and Vascular Biology*. 2014;34:870-876
326. Akahori H, Karmali V, Polavarapu R, et al. Cd163 interacts with tweak to regulate tissue regeneration after ischaemic injury. *Nature Communications*. 2015;6:7792
327. Amano H, Ito Y, Eshima K, Kato S, Ogawa F, Hosono K, Oba K, Tamaki H, Sakagami H, Shibuya M, Narumiya S, Majima M. Thromboxane a(2) induces blood flow recovery via platelet adhesion to ischaemic regions. *Cardiovascular Research*. 2015;107:509-521

328. Amano H, Kato S, Ito Y, Eshima K, Ogawa F, Takahashi R, Sekiguchi K, Tamaki H, Sakagami H, Shibuya M, Majima M. The role of vascular endothelial growth factor receptor-1 signaling in the recovery from ischemia. *PLoS One*. 2015;10:e0131445
329. Araki S, Izumiya Y, Rokutanda T, et al. Sirt7 contributes to myocardial tissue repair by maintaining transforming growth factor-beta signaling pathway. *Circulation*. 2015;132:1081-1093
330. Assiri AMA, El-Baz HA, Amin AH. Tumor necrosis factor inhibition increases the revascularization of ischemic hind-limbs in diabetic mice. *Naunyn-Schmiedeberg's Archives of Pharmacology*. 2015;388:1053-1060
331. Bortolotti F, Ukovich L, Razban V, Martinelli V, Ruozi G, Pelos B, Dore F, Giacca M, Zacchigna S. In vivo therapeutic potential of mesenchymal stromal cells depends on the source and the isolation procedure. *Stem Cell Reports*. 2015;4:332-339
332. Chen G-F, Sudhakar V, Youn S-W, et al. Copper transport protein antioxidant-1 promotes inflammatory neovascularization via chaperone and transcription factor function. *Scientific Reports*. 2015;5:14780
333. Cho JG, Lee JH, Hong SH, Lee HN, Kim CM, Kim SY, Yoon KJ, Oh BJ, Kim JH, Jung SY, Asahara T, Kwon S-M, Park SG. Tauroursodeoxycholic acid, a bile acid, promotes blood vessel repair by recruiting vasculogenic progenitor cells. *Stem Cells (Miami)*. 2015;33:792-805
334. Dash BC, Thomas D, Monaghan M, Carroll O, Chen X, Woodhouse K, O'Brien T, Pandit A. An injectable elastin-based gene delivery platform for dose-dependent modulation of angiogenesis and inflammation for critical limb ischemia. *Biomaterials*. 2015;65:126-139
335. Desjarlais M, Dussault S, Dhahri W, Mathieu R, Rivard A. Direct renin inhibition with aliskiren improves ischemia-induced neovascularization: Blood pressure-independent effect. *Atherosclerosis*. 2015;242:450-460
336. Di Bartolo BA, Cartland SP, Prado-Lourenco L, Griffith TS, Gentile C, Ravindran J, Azahri NSM, Thai T, Yeung AWS, Thomas SR, Kavurma MM. Tumor necrosis factor-related apoptosis-inducing ligand (trail) promotes angiogenesis and ischemia-induced neovascularization via nadph oxidase 4 (nox4) and nitric oxide-dependent mechanisms. *J. Am. Heart Assoc.* 2015;4:16
337. Dokun AO, Chen L, Okutsu M, Farber CR, Hazarika S, Jones WS, Craig D, Marchuk DA, Lye RJ, Shah SH, Annex BH. Adam12: A genetic modifier of preclinical peripheral arterial disease. *American Journal of Physiology - Heart and Circulatory Physiology*. 2015;309:H790-H803
338. Gomez-Rodriguez V, Orbe J, Martinez-Aguilar E, Rodriguez JA, Fernandez-Alonso L, Serneels J, Bobadilla M, Perez-Ruiz A, Collantes M, Mazzone M, Paramo JA, Roncal C. Functional mmp-10 is required for efficient tissue repair after experimental hind limb ischemia. *FASEB Journal*. 2015;29:960-972
339. Heuslein JL, Meisner JK, Li XY, Song J, Vincentelli H, Leiphart RJ, Ames EG, Blackman BR, Price RJ. Mechanisms of amplified arteriogenesis in collateral artery segments exposed to reversed flow direction. *Arteriosclerosis Thrombosis and Vascular Biology*. 2015;35:2354-2365
340. Ikeda Y, Hamano H, Satoh A, Horinouchi Y, Izawa-Ishizawa Y, Kihira Y, Ishizawa K, Aihara K, Tsuchiya K, Tamaki T. Bilirubin exerts pro-angiogenic property through akt-endothelial-dependent pathway. *Hypertens. Res.* 2015;38:733-740
341. Izumi Y, Yamaguchi T, Yamazaki T, Yamashita N, Nakamura Y, Shiota M, Tanaka M, Sano S, Osada-Oka M, Shimada K, Wanibuchi H, Miura K, Yoshiyama M, Iwao H. Percutaneous carbon dioxide treatment using a gas mist generator enhances the collateral blood flow in the ischemic hindlimb. *J. Atheroscler. Thromb.* 2015;22:38-51
342. Jiang L, Yin M, Wei X, et al. Bach1 represses wnt/beta-catenin signaling and angiogenesis. *Circulation Research*. 2015;117:364-375

343. Kolluru GK, Bir SC, Yuan S, Shen X, Pardue S, Wang R, Kevil CG. Cystathionine gamma-lyase regulates arteriogenesis through no-dependent monocyte recruitment. *Cardiovascular Research*. 2015;107:590-600
344. Li R-L, Huang J-J, Shi Y-Q, Hu A, Lu Z-Y, Weng L, Wang S-Q, Han Y-P, Zhang L, Hao C-N, Duan J-L. Pulsed electromagnetic field improves postnatal neovascularization in response to hindlimb ischemia. *American Journal of Translational Research*. 2015;7:430-444
345. Li X, Cheng XW, Hu L, et al. Cathepsin s activity controls ischemia-induced neovascularization in mice. *International Journal of Cardiology*. 2015;183:198-208
346. Liu X, Sun X, Liao H, et al. Mitochondrial aldehyde dehydrogenase 2 regulates revascularization in chronic ischemia potential impact on the development of coronary collateral circulation. *Arteriosclerosis Thrombosis and Vascular Biology*. 2015;35:2196-2206
347. Lozeron P, Mantsounga CS, Broqueres-You D, Dohan A, Polivka M, Deroide N, Silvestre J-S, Kubis N, Levy BI. Characterization of nerve and microvessel damage and recovery in type 1 diabetic mice after permanent femoral artery ligation. *Journal of Neuroscience Research*. 2015;93:1451-1461
348. Makarevich PI, Boldyreva MA, Gluhanyuk EV, Efimenko AY, Dergilev KV, Shevchenko EK, Sharonov GV, Gallinger JO, Rodina PA, Sarkisyan SS, Hu Y-C, Parfyonova YV. Enhanced angiogenesis in ischemic skeletal muscle after transplantation of cell sheets from baculovirus-transduced adipose-derived stromal cells expressing vegf165. *Stem Cell Research & Therapy*. 2015;6:204
349. Mittal M, Urao N, Hecquet CM, Zhang M, Sudhakar V, Gao X-p, Komarova Y, Ushio-Fukai M, Malik AB. Novel role of reactive oxygen species-activated trp melastatin channel-2 in mediating angiogenesis and postischemic neovascularization. *Arteriosclerosis Thrombosis and Vascular Biology*. 2015;35:877-887
350. Odent G, Preda MB, Radu E, Rosca AM, Tutuianu R, Mitroi DN, Simionescu M, Burlacu A. Combinatorial approach for improving the outcome of angiogenic therapy in ischemic tissues. *Biomaterials*. 2015;60:72-81
351. Qi X, Yuan Y, Xu K, Zhong H, Zhang Z, Zhai H, Guan G, Yu G. (2-hydroxypropyl)-beta-cyclodextrin is a new angiogenic molecule for therapeutic angiogenesis. *PLoS One*. 2015;10
352. Richards J, Gabunia K, Kelemen SE, Kako F, Choi ET, Autieri MV. Interleukin-19 increases angiogenesis in ischemic hind limbs by direct effects on both endothelial cells and macrophage polarization. *Journal of Molecular and Cellular Cardiology*. 2015;79:21-31
353. Rishi MT, Selvaraju V, Thirunavukkarasu M, Shaikh IA, Takeda K, Fong G-H, Palesty JA, Sanchez JA, Maulik N. Deletion of prolyl hydroxylase domain proteins (phd1, phd3) stabilizes hypoxia inducible factor-1 alpha, promotes neovascularization, and improves perfusion in a murine model of hind-limb ischemia. *Microvascular Research*. 2015;97:181-188
354. Shen C, Li L, Feng T, Li J, Yu M, Lu Q, Li H. Dental pulp stem cells derived conditioned medium promotes angiogenesis in hindlimb ischemia. *Tissue Engineering and Regenerative Medicine*. 2015;12:59-68
355. Sheu J-J, Chang M-W, Wallace CG, Chiang H-J, Sung P-H, Tsai T-H, Chung S-Y, Chen Y-L, Chua S, Chang H-W, Sun C-K, Lee F-Y, Yip H-K. Exendin-4 protected against critical limb ischemia in obese mice. *American Journal of Translational Research*. 2015;7:445-459
356. Tahergorabi Z, Khazaei M, Rashidi B. Systemic administration of ghrelin did not restore angiogenesis in hindlimb ischemia in control and diet-induced obese mice. *Bratisl. Med. J*. 2015;116:35-40
357. Takahashi N, Shibata R, Ouchi N, Sugimoto M, Murohara T, Komori K. Metformin stimulates ischemia-induced revascularization through an enos dependent pathway in the ischemic hindlimb mice model. *Journal of Vascular Surgery*. 2015;61:489-496

358. Tekabe Y, Anthony T, Li Q, Ray R, Rai V, Zhang GP, Schmidt AM, Johnson LL. Treatment effect with anti-rage f(ab)(2) antibody improves hind limb angiogenesis and blood flow in type 1 diabetic mice with left femoral artery ligation. *Vasc. Med.* 2015;20:212-218
359. Theurl M, Schgoer W, Albrecht-Schgoer K, Lener D, Wolf D, Wolf M, Demetz E, Tymoszyk P, Tancevski I, Fischer-Colbrie R, Franz W-M, Marschang P, Kirchmair R. Secretoneurin gene therapy improves hind limb and cardiac ischaemia in apo e<sup>-/-</sup> mice without influencing systemic atherosclerosis. *Cardiovascular Research.* 2015;105:96-106
360. Togliatto G, Trombetta A, Dentelli P, Gallo S, Rosso A, Cotogni P, Granata R, Falcioni R, Delale T, Ghigo E, Brizzi MF. Unacylated ghrelin induces oxidative stress resistance in a glucose intolerance and peripheral artery disease mouse model by restoring endothelial cell mir-126 expression. *Diabetes.* 2015;64:1370-1382
361. Vandenberghe C, Kauskot A, Vandersmissen I, Criel M, Geenens R, Craps S, Lutun A, Janssens S, Hoylaerts MF, Verhamme P. Platelet endothelial aggregation receptor-1: A novel modifier of neoangiogenesis. *Cardiovascular Research.* 2015;108:124-138
362. Wang T, Cunningham A, Dokun AO, Hazarika S, Houston K, Chen L, Lye RJ, Spolski R, Leonard WJ, Annex BH. Loss of interleukin-21 receptor activation in hypoxic endothelial cells impairs perfusion recovery after hindlimb ischemia. *Arteriosclerosis Thrombosis and Vascular Biology.* 2015;35:1218-1225
363. Wu J, Strawn TL, Luo M, Wang L, Li R, Ren M, Xia J, Zhang Z, Ma W, Luo T, Lawrence DA, Fay WP. Plasminogen activator inhibitor-1 inhibits angiogenic signaling by uncoupling vascular endothelial growth factor receptor-2-alpha $\beta$ 3 integrin cross talk. *Arterioscler Thromb Vasc Biol.* 2015;35:111-120
364. Albadawi H, Tzika AA, Rask-Madsen C, Crowley LM, Koulopoulos MW, Yoo H-J, Watkins MT. Revascularization and muscle adaptation to limb demand ischemia in diet-induced obese mice. *Journal of Surgical Research.* 2016;205:49-58
365. Amano H, Nakamura M, Ito Y, Kakutani H, Eshima K, Kitasato H, Narumiya S, Majima M. Thromboxane synthase enhances blood flow recovery from hindlimb ischemia. *Journal of Surgical Research.* 2016;204:153-163
366. Andersen NJ, Boguslawski EA, Naidu AS, Szot C, Bromberg-White JL, Kits K, Kuk CY, Holton LE, St Croix B, Chambers CM, Duesbery NS. Anthrax toxin receptor 1 is essential for arteriogenesis in a mouse model of hindlimb ischemia. *PLoS One.* 2016;11:e0146586
367. Brandes RP, Harenkamp S, Schurmann C, et al. The cytosolic nadph oxidase subunit nox1 promotes an endothelial stalk cell phenotype. *Arterioscler Thromb Vasc Biol.* 2016;36:1558-1565
368. Chen T, Chen N, Pang N, Xiao L, Li Y, Li R, Luo M, Deng X, Ren M, Wu J, Wang L. Hydroxysafflor yellow a promotes angiogenesis via the angiopoietin 1/tie-2 signaling pathway. *Journal of Vascular Research.* 2016;53:245-254
369. Cheng Z, Garikipati VNS, Nickoloff E, Wang C, Polhemus DJ, Zhou J, Benedict C, Khan M, Verma SK, Rabinowitz JE, Lefer D, Kishore R. Restoration of hydrogen sulfide production in diabetic mice improves reparative function of bone marrow cells. *Circulation.* 2016;134:1467-1483
370. Czaplak J, Matuszczak S, Wisniewska E, Jarosz-Biej M, Smolarczyk R, Cichon T, Glowala-Kosinska M, Sliwka J, Garbacz M, Szczypior M, Jazwiec T, Langrzyk A, Zembala M, Szala S. Human cardiac mesenchymal stromal cells with cd105(+)/cd34(-) phenotype enhance the function of post-infarction heart in mice. *PLoS One.* 2016;11:e0158745
371. Flex A, Biscetti F, Iachininoto MG, Nuzzolo ER, Orlando N, Capodimonti S, Angelini F, Valentini CG, Bianchi M, Larocca LM, Martini M, Teofili L. Human cord blood endothelial progenitors promote post-ischemic angiogenesis in immunocompetent mouse model. *Thrombosis Research.* 2016;141:106-111
372. He S, Zhao T, Guo H, Meng Y, Qin G, Goukassian DA, Han J, Gao X, Zhu Y. Coordinated activation of vegf/vegfr-2 and ppar $\delta$  pathways by a multi-component chinese medicine

- dhi accelerated recovery from peripheral arterial disease in type 2 diabetic mice. *PLoS ONE [Electronic Resource]*. 2016;11:e0167305
373. Holfeld J, Tepekoeylue C, Reissig C, et al. Toll-like receptor 3 signalling mediates angiogenic response upon shock wave treatment of ischaemic muscle. *Cardiovascular Research*. 2016;109:331-343
  374. Horikoshi-Ishihara H, Tobita M, Tajima S, Tanaka R, Oshita T, Tabata Y, Mizuno H. Coadministration of adipose-derived stem cells and control-released basic fibroblast growth factor facilitates angiogenesis in a murine ischemic hind limb model. *Journal of Vascular Surgery*. 2016;64:1825-1834
  375. Hu Q, Wu D, Ma F, Yang S, Tan B, Xin H, Gu X, Chen X, Chen S, Mao Y, Zhu YZ. Novel angiogenic activity and molecular mechanisms of zyz-803, a slow-releasing hydrogen sulfide-nitric oxide hybrid molecule. *Antioxidants & Redox Signaling*. 2016;25:498-514
  376. Hung S-C, Kuo K-L, Huang H-L, Lin C-C, Tsai T-H, Wang C-H, Chen J-W, Lin S-J, Huang P-H, Tarng D-C. Indoxyl sulfate suppresses endothelial progenitor cell-mediated neovascularization. *Kidney International*. 2016;89:574-585
  377. Kan X, Wu Y, Ma Y, Zhang C, Li P, Wu L, Zhang S, Li Y, Du J. Deficiency of il-12p35 improves cardiac repair after myocardial infarction by promoting angiogenesis. *Cardiovascular Research*. 2016;109:249-259
  378. Kang X, Wei X, Wang X, Jiang L, Niu C, Zhang J, Chen S, Meng D. Nox2 contributes to the arterial endothelial specification of mouse induced pluripotent stem cells by upregulating notch signaling. *Scientific Reports*. 2016;6:33737
  379. Lam YT, Lecce L, Clayton Z, Simpson PJL, Karas RH, Ng MKC. Aging impairs ischemia-induced neovascularization by attenuating the mobilization of bone marrow-derived angiogenic cells. *IJC Metab. Endocr*. 2016;12:19-29
  380. Lam YT, Lecce L, Tan JTM, Bursill CA, Handelsman DJ, Ng MKC. Androgen receptor-mediated genomic androgen action augments ischemia-induced neovascularization. *Endocrinology*. 2016;157:4853-4864
  381. Leu S, Day Y-J, Sun C-K, Yip H-K. Tpa-mmp-9 axis plays a pivotal role in mobilization of endothelial progenitor cells from bone marrow to circulation and ischemic region for angiogenesis. *Stem Cells International*. 2016:5417565
  382. Li N, Li W, Qin J, Peng Z, Lu X, Li X. Overexpression of hsp70 enhances mscs survival and therapeutic efficiency in hindlimb ischemia. *International Journal of Clinical and Experimental Medicine*. 2016;9:5389-5399
  383. Lu Z-Y, Li R-L, Zhou H-S, Huang J-J, Su Z-X, Qi J, Zhang L, Li Y, Shi Y-Q, Hao C-N, Duan J-L. Therapeutic ultrasound reverses peripheral ischemia in type 2 diabetic mice through pi3k-akt-enos pathway. *American Journal of Translational Research*. 2016;8:3666-3677
  384. Ma B, Whiteford JR, Nourshargh S, Woodfin A. Underlying chronic inflammation alters the profile and mechanisms of acute neutrophil recruitment. *Journal of Pathology*. 2016;240:291-303
  385. Ma Q, Xia X, Tao Q, Lu K, Shen J, Xu Q, Hu X, Tang Y, Block NL, Webster KA, Schally AV, Wang Ja, Yu H. Profound actions of an agonist of growth hormone-releasing hormone on angiogenic therapy by mesenchymal stem cells. *Arteriosclerosis Thrombosis and Vascular Biology*. 2016;36:663-672
  386. McClung JM, McCord TJ, Southerland K, Schmidt CA, Padgett ME, Ryan TE, Kontos CD. Subacute limb ischemia induces skeletal muscle injury in genetically susceptible mice independent of vascular density. *Journal of Vascular Surgery*. 2016;64:1101-1111
  387. Monteforte AJ, Lam B, Das S, Mukhopadhyay S, Wright CS, Martin PE, Dunn AK, Baker AB. Glypican-1 nanoliposomes for potentiating growth factor activity in therapeutic angiogenesis. *Biomaterials*. 2016;94:45-56
  388. Nanda V, Downing KP, Ye J, et al. Cdkn2b regulates tgfbeta signaling and smooth muscle cell investment of hypoxic neovessels. *Circulation Research*. 2016;118:230-240

389. Park C, Lee T-J, Bhang SH, et al. Injury-mediated vascular regeneration requires endothelial *er71/etv2*. *Arteriosclerosis Thrombosis and Vascular Biology*. 2016;36:86-96
390. Perrucci GL, Straino S, Corliano M, Scopece A, Napolitano M, Berk BC, Lombardi F, Pompilio G, Capogrossi MC, Nigro P. Cyclophilin a modulates bone marrow-derived cd117(+) cells and enhances ischemia-induced angiogenesis via the sdf-1/cxcr4 axis. *International Journal of Cardiology*. 2016;212:324-335
391. Ryan TE, Schmidt CA, Green TD, Spangenburg EE, Neuffer PD, McClung JM. Targeted expression of catalase to mitochondria protects against ischemic myopathy in high-fat diet-fed mice. *Diabetes*. 2016;65:2553-2568
392. Samura M, Morikage N, Suehiro K, Tanaka Y, Nakamura T, Nishimoto A, Ueno K, Hosoyama T, Hamano K. Combinatorial treatment with apelin-13 enhances the therapeutic efficacy of a preconditioned cell-based therapy for peripheral ischemia. *Scientific Reports*. 2016;6:19379
393. Sanada F, Kanbara Y, Taniyama Y, Otsu R, Carracedo M, Ikeda-Iwabu Y, Muratsu J, Sugimoto K, Yamamoto K, Rakugi H, Morishita R. Induction of angiogenesis by a type iii phosphodiesterase inhibitor, cilostazol, through activation of peroxisome proliferator-activated receptor-gamma and camp pathways in vascular cells. *Arteriosclerosis Thrombosis and Vascular Biology*. 2016;36:545-552
394. Sanada F, Taniyama Y, Muratsu J, Otsu R, Iwabayashi M, Carracedo M, Rakugi H, Morishita R. Activated factor x induces endothelial cell senescence through igfbp-5. *Scientific Reports*. 2016;6:35580
395. Shen Y, Zuo S, Wang Y, et al. Thromboxane governs the differentiation of adipose-derived stromal cells toward endothelial cells in vitro and in vivo. *Circulation Research*. 2016;118:1194-1207
396. Song Y, Xie X, Gao Y, Gu G, Wang P. Ultrasound-induced microbubble destruction promotes targeted delivery of adipose-derived stem cells to improve hind-limb ischemia of diabetic mice. *American Journal of Translational Research*. 2016;8:2585-2596
397. Sun JT, Yang K, Mao JY, Shen WF, Lu L, Wu QH, Wang YP, Wu LP, Zhang RY. Cyanate-impaired angiogenesis: Association with poor coronary collateral growth in patients with stable angina and chronic total occlusion. *J. Am. Heart Assoc*. 2016;5:10
398. Takata K, Imaizumi S, Kawachi E, et al. The apoa-i mimetic peptide famp promotes recovery from hindlimb ischemia through a nitric oxide (no)-related pathway. *International Journal of Cardiology*. 2016;207:317-325
399. Tan JTM, Prosser HCG, Dunn LL, Vanags LZ, Ridiandries A, Tsatralis T, Leece L, Clayton ZE, Yuen SCG, Robertson S, Lam YT, Celermajer DS, Ng MKC, Bursill CA. High-density lipoproteins rescue diabetes-impaired angiogenesis via scavenger receptor class b type i. *Diabetes*. 2016;65:3091-3103
400. Tan XY, Yan K, Ren MP, Chen N, Li YJ, Deng X, Wang LQ, Li R, Luo M, Liu Y, Liu Y, Wu JB. Angiopoietin-2 impairs collateral artery growth associated with the suppression of the infiltration of macrophages in mouse hindlimb ischaemia. *J. Transl. Med*. 2016;14:8
401. Thomas D, Thirumaran A, Mallard B, Chen X, Browne S, Wheatley AM, O'Brien T, Pandit A. Variability in endogenous perfusion recovery of immunocompromised mouse models of limb ischemia. *Tissue Engineering Part C-Methods*. 2016;22:370-381
402. Tsatralis T, Ridiandries A, Robertson S, Vanags LZ, Lam YT, Tan JTM, Ng MKC, Bursill CA. Reconstituted high-density lipoproteins promote wound repair and blood flow recovery in response to ischemia in aged mice. *Lipids Health Dis*. 2016;15:12
403. Watanabe Y, Murdoch CE, Sano S, Ido Y, Bachschmid MM, Cohen RA, Matsui R. Glutathione adducts induced by ischemia and deletion of glutaredoxin-1 stabilize hif-1 alpha and improve limb revascularization. *Proceedings of the National Academy of Sciences of the United States of America*. 2016;113:6011-6016

404. Wu J, Hadoke PWF, Takov K, Korczak A, Denvir MA, Smith LB. Influence of androgen receptor in vascular cells on reperfusion following hindlimb ischaemia. *PLoS One*. 2016;11:e0154987
405. Xiao L, Yan K, Yang Y, Chen N, Li Y, Deng X, Wang L, Liu Y, Mu L, Li R, Luo M, Ren M, Wu J. Anti-vascular endothelial growth factor treatment induces blood flow recovery through vascular remodeling in high-fat diet induced diabetic mice. *Microvascular Research*. 2016;105:70-76
406. Yamauchi H, Miura S, Owada T, Saitoh S-i, Machii H, Yamada S, Ishigami A, Takeishi Y. Senescence marker protein-30 deficiency impairs angiogenesis under ischemia. *Free Radical Biology & Medicine*. 2016;94:66-73
407. Yang J, Zhang X, Zhao Z, Li X, Wang X, Chen M, Song B, li M, Shen Z. Regulatory roles of interferon-inducible protein 204 on differentiation and vasculogenic activity of endothelial progenitor cells. *Stem Cell Research & Therapy*. 2016;7:111
408. Yang Y, Chen Z, Zhang T, Wang S, Qing Y. Wnt3a promoted the therapeutic of angiogenesis on lower leg ischemia with endothelial progenitor cells. *International Journal of Clinical and Experimental Medicine*. 2016;9:5902-5911
409. Zhao J, Niu H, Li A, Nie L. Acetylbritannilactone modulates vascular endothelial growth factor signaling and regulates angiogenesis in endothelial cells. *PLoS ONE [Electronic Resource]*. 2016;11:e0148968
410. Ariyanti AD, Sisjayawan J, Zhang J, Zhang J-Q, Wang G-X, Miyagishi M, Wu S-R, Kasim V. Elevating vegf-a and pdgf-bb secretion by salidroside enhances neoangiogenesis in diabetic hind-limb ischemia. *Oncotarget*. 2017;8:97187-97205
411. Arpino JM, Nong ZX, Li FY, Yin H, Ghonaim N, Milkovich S, Balint B, O'Neil C, Fraser GM, Goldman D, Ellis CG, Pickering JG. Four-dimensional microvascular analysis reveals that regenerative angiogenesis in ischemic muscle produces a flawed microcirculation. *Circulation Research*. 2017;120:1453-+
412. Beneke A, Guentsch A, Hillemann A, Zieseniss A, Swain L, Katschinski DM. Loss of phd3 in myeloid cells dampens the inflammatory response and fibrosis after hind-limb ischemia. *Cell Death & Disease*. 2017;8:e2976
413. Biscetti F, Gentileschi S, Bertucci F, Servillo M, Arena V, Angelini F, Stigliano E, Bonanno G, Scambia G, Sacchetti B, Pierelli L, Landolfi R, Flex A. The angiogenic properties of human adipose-derived stem cells (hasc) are modulated by the high mobility group box protein 1 (hmgb1). *International Journal of Cardiology*. 2017;249:349-356
414. Cavallari C, Ranghino A, Tapparo M, Cedrino M, Figliolini F, Grange C, Giannachi V, Garneri P, Deregibus MC, Collino F, Rispoli P, Camussi G, Brizzi MF. Serum-derived extracellular vesicles (evs) impact on vascular remodeling and prevent muscle damage in acute hind limb ischemia. *Scientific Reports*. 2017;7:8180
415. Costa M, Cerqueira MT, Santos TC, Sampaio-Marques B, Ludovico P, Marques AP, Pirraço RP, Reis RL. Cell sheet engineering using the stromal vascular fraction of adipose tissue as a vascularization strategy. *Acta Biomater*. 2017;55:131-143
416. Desjarlais M, Dussault S, Dhahri W, Mathieu R, Rivard A. MicroRNA-150 modulates ischemia-induced neovascularization in atherosclerotic conditions. *Arteriosclerosis Thrombosis and Vascular Biology*. 2017;37:900-908
417. Dhahri W, Dussault S, Haddad P, Turgeon J, Tremblay S, Rolland K, Desjarlais M, Caceres-Gorriti KY, Mathieu R, Rivard A. Reduced expression of let-7f activates tgfbeta/alk5 pathway and leads to impaired ischaemia-induced neovascularization after cigarette smoke exposure. *J Cell Mol Med*. 2017;21:2211-2222
418. Elshaer SL, Mohamed IN, Coucha M, Altantawi S, Eldahshan W, Bartasi ML, Shanab AY, Lorys R, El-Remessy AB. Deletion of txnip mitigates high-fat diet-impaired angiogenesis and prevents inflammation in a mouse model of critical limb ischemia. *Antioxidants*. 2017;6:17

419. Fan W, Han D, Sun Z, Ma S, Gao L, Chen J, Li X, Li X, Fan M, Li C, Hu D, Wang Y, Cao F. Endothelial deletion of mtorc1 protects against hindlimb ischemia in diabetic mice via activation of autophagy, attenuation of oxidative stress and alleviation of inflammation. *Free Radical Biology & Medicine*. 2017;108:725-740
420. Gallego-Perez D, Pal D, Ghatak S, et al. Topical tissue nano-transfection mediates non-viral stroma reprogramming and rescue. *Nat. Nanotechnol.* 2017;12:974-979
421. Gangadaran P, Rajendran RL, Lee HW, Kalimuthu S, Hong CM, Jeong SY, Lee S-W, Lee J, Ahn B-C. Extracellular vesicles from mesenchymal stem cells activates vegf receptors and accelerates recovery of hindlimb ischemia. *Journal of Controlled Release*. 2017;264:112-126
422. Ganta VC, Choi MH, Kutateladze A, Fox TE, Farber CR, Annex BH. A microrna93-interferon regulatory factor-9-immunoresponsive gene-1-itaconic acid pathway modulates m2-like macrophage polarization to revascularize ischemic muscle. *Circulation*. 2017;135:2403-2425
423. Hansen LM, Gupta D, Joseph G, Weiss D, Taylor WR. The receptor for advanced glycation end products impairs collateral formation in both diabetic and non-diabetic mice. *Laboratory Investigation*. 2017;97:34-42
424. Hayashida R, Kondo K, Morita S, Unno K, Shintani S, Shimizu Y, Calvert JW, Shibata R, Murohara T. Diallyl trisulfide augments ischemia-induced angiogenesis via an endothelial nitric oxide synthase-dependent mechanism. *Circulation Journal*. 2017;81:870-878
425. Hedhli J, Konopka CJ, Schuh S, Bouvin H, Cole JA, Huntsman HD, Kilian KA, Dobrucki IT, Boppart MD, Dobrucki LW. Multimodal assessment of mesenchymal stem cell therapy for diabetic vascular complications. *Theranostics*. 2017;7:3876-3888
426. Hsu P-Y, Hsi E, Wang T-M, Lin R-T, Liao Y-C, Juo S-HH. Microrna let-7g possesses a therapeutic potential for peripheral artery disease. *Journal of Cellular and Molecular Medicine*. 2017;21:519-529
427. Kim MH, Kim SG, Kim CG, Kim DW. A novel tc-99 m and fluorescence labeled peptide as a multimodal imaging agent for targeting angiogenesis in a murine hindlimb ischemia model. *Appl. Radiat. Isot.* 2017;121:22-27
428. Kundu N, Domingues CC, Chou C, Ahmadi N, Houston S, Jerry DJ, Sen S. Use of p53-silenced endothelial progenitor cells to treat ischemia in diabetic peripheral vascular disease. *J. Am. Heart Assoc.* 2017;6:15
429. Liu G, Fang Z, Yuan M, Li W, Yang Y, Jiang M, Ouyang Y, Yuan W. Biodegradable carriers for delivery of vegf plasmid DNA for the treatment of critical limb ischemia. *Frontiers in Pharmacology*. 2017;8:528
430. Lopez-Diez R, Shen X, Daffu G, Khursheed M, Hu J, Song F, Rosario R, Xu Y, Li Q, Xi X, Zou YS, Li H, Schmidt AM, Yan SF. Ager deletion enhances ischemic muscle inflammation, angiogenesis, and blood flow recovery in diabetic mice. *Arteriosclerosis Thrombosis and Vascular Biology*. 2017;37:1536-1547
431. Malik RA, Zippel N, Froemel T, Heidler J, Zukunft S, Walzog B, Ansari N, Pampaloni F, Wingert S, Rieger MA, Wittig I, Fisslthaler B, Fleming I. Amp-activated protein kinase alpha 2 in neutrophils regulates vascular repair via hypoxia-inducible factor-1 alpha and a network of proteins affecting metabolism and apoptosis. *Circulation Research*. 2017;120:99-109
432. Mathieu R, Dussault S, Desjarlais M, Rivard F, Dhahri W, Cloutier A, Nuyt A-M, Rivard A. Neonatal exposure to high oxygen levels leads to impaired ischemia-induced neovascularization in adulthood. *Scientific Reports*. 2017;7:14143
433. McClung JM, McCord TJ, Ryan TE, et al. Bag3 (bcl-2-associated athanogene-3) coding variant in mice determines susceptibility to ischemic limb muscle myopathy by directing autophagy. *Circulation*. 2017;136:281-296



434. Ministro A, de Oliveira P, Nunes RJ, et al. Low-dose ionizing radiation induces therapeutic neovascularization in a pre-clinical model of hindlimb ischemia. *Cardiovascular Research*. 2017;113:783-794
435. Qi J, Wang JJ, Duan JL, Lu ZY, Yuan YG. Leonurine improves age-dependent impaired angiogenesis: Possible involvement of mitochondrial function and hif-1 alpha dependent vegf activation. *Frontiers in Pharmacology*. 2017;8:284
436. Ridiandries A, Tan JTM, Ravindran D, Williams H, Medbury HJ, Lindsay L, Hawkins C, Prosser HCG, Bursill CA. Cc-chemokine class inhibition attenuates pathological angiogenesis while preserving physiological angiogenesis. *FASEB Journal*. 2017;31:1179-1192
437. Rybalko V, Hsieh P-L, Ricles LM, Chung E, Farrar RP, Suggs LJ. Therapeutic potential of adipose-derived stem cells and macrophages for ischemic skeletal muscle repair. *Regenerative Medicine*. 2017;12:153-167
438. Sarkar C, Ganju RK, Pompili VJ, Chakroborty D. Enhanced peripheral dopamine impairs post-ischemic healing by suppressing angiotensin receptor type 1 expression in endothelial cells and inhibiting angiogenesis. *Angiogenesis*. 2017;20:97-107
439. Su S-T, Yeh C-L, Hou Y-C, Pai M-H, Yeh S-L. Dietary glutamine supplementation enhances endothelial progenitor cell mobilization in streptozotocin-induced diabetic mice subjected to limb ischemia. *Journal of Nutritional Biochemistry*. 2017;40:86-94
440. Sun X, Zhu H, Dong Z, et al. Mitochondrial aldehyde dehydrogenase-2 deficiency compromises therapeutic effect of aldh bright cell on peripheral ischemia. *Redox Biology*. 2017;13:196-206
441. Tudisco L, Orlandi A, Tarallo V, De Falco S. Hypoxia activates placental growth factor expression in lymphatic endothelial cells. *Oncotarget*. 2017;8:32873-32883
442. Vasam G, Joshi S, Thatcher SE, Bartelmez SH, Cassis LA, Jarajapu YPR. Reversal of bone marrow mobilopathy and enhanced vascular repair by angiotensin-(1-7) in diabetes. *Diabetes*. 2017;66:505-518
443. Wagner N-M, Van Aken C, Butschkau A, Bierhansl L, Kellner P, Schleusener V, Seggewiss J, Vollmar B, Noeldge-Schomburg G, Roesner JP. Procalcitonin impairs endothelial cell function and viability. *Anesthesia & Analgesia*. 2017;124:836-845
444. Wang H, Agarwal P, Xiao YC, Peng H, Zhao ST, Liu XY, Zhou SH, Li JR, Liu ZG, He XM. A nano-in-micro system for enhanced stem cell therapy of ischemic diseases. *ACS Central Sci*. 2017;3:875-885
445. Wu Q-H, Ma Y, Ruan C-C, Yang Y, Liu X-H, Ge Q, Kong L-R, Zhang J-W, Yan C, Gao P-J. Loss of osteoglycin promotes angiogenesis in limb ischaemia mouse models via modulation of vascular endothelial growth factor and vascular endothelial growth factor receptor 2 signalling pathway. *Cardiovascular Research*. 2017;113:70-80
446. Xie J, Li R, Wu H, Chen J, Li G, Chen Q, Wei Z, He G, Wang L, Ferro A, Xu B. Advanced glycation endproducts impair endothelial progenitor cell migration and homing via syndecan 4 shedding. *Stem Cells (Miami)*. 2017;35:522-531
447. Yang Y, Xiao L, Chen N, Li Y, Deng X, Wang L, Sun H, Wu J. Platelet-derived factor v promotes angiogenesis in a mouse hind limb ischemia model. *Journal of Vascular Surgery*. 2017;65:1180-1188
448. You J, Sun J, Ma T, Yang Z, Wang X, Zhang Z, Li J, Wang L, Li M, Yang J, Shen Z. Curcumin induces therapeutic angiogenesis in a diabetic mouse hindlimb ischemia model via modulating the function of endothelial progenitor cells. *Stem Cell Research & Therapy*. 2017;8:182
449. Zaccagnini G, Maimone B, Fuschi P, Maselli D, Spinetti G, Gaetano C, Martelli F. Overexpression of mir-210 and its significance in ischemic tissue damage. *Scientific Reports*. 2017;7:9563

450. Zahavi-Goldstein E, Blumenfeld M, Fuchs-Telem D, Pinzur L, Rubin S, Aberman Z, Sher N, Ofir R. Placenta-derived plx-pad mesenchymal-like stromal cells are efficacious in rescuing blood flow in hind limb ischemia mouse model by a dose- and site-dependent mechanism of action. *Cytotherapy*. 2017;19:1438-1446
451. Zayed MA, Wei X, Park K-m, Belaygorod L, Naim U, Harvey J, Yin L, Blumer K, Semenkovich CF. N-acetylcysteine accelerates amputation stump healing in the setting of diabetes. *FASEB Journal*. 2017;31:2686-2695
452. Zhao G, Cheng XW, Piao L, Hu L, Lei Y, Yang G, Inoue A, Ogasawara S, Wu H, Hao C-N, Okumura K, Kuzuya M. The soluble vegf receptor sflt-1 contributes to impaired neovascularization in aged mice. *Aging and Disease*. 2017;8:287-300
453. Zhu L-P, Zhou J-P, Zhang J-X, Wang J-Y, Wang Z-Y, Pan M, Li L-F, Chen L, Li C-C, Wang K-K, Bai Y-P, Zhang G-G. Mir-15b-5p regulates collateral artery formation by targeting akt3 (protein kinase b-3). *Arteriosclerosis Thrombosis and Vascular Biology*. 2017;37:957-968
454. Apicella I, Cicatiello V, Acampora D, Tarallo V, De Falco S. Full functional knockout of placental growth factor by knockin with an inactive variant able to heterodimerize with vegf-a. *Cell Reports*. 2018;23:3635-3646
455. Besnier M, Gasparino S, Vono R, et al. Mir-210 enhances the therapeutic potential of bone-marrow-derived circulating proangiogenic cells in the setting of limb ischemia. *Molecular Therapy*. 2018;26:1694-1705
456. Borton AH, Benson BL, Neilson LE, Saunders A, Alaiti MA, Huang AY, Jain MK, Proweller A, Ramirez-Bergeron DL. Aryl hydrocarbon receptor nuclear translocator in vascular smooth muscle cells is required for optimal peripheral perfusion recovery. *J. Am. Heart Assoc*. 2018;7:23
457. Budatha M, Zhang J, Zhuang ZW, Yun S, Dahlman JE, Anderson DG, Schwartz MA. Inhibiting integrin alpha5 cytoplasmic domain signaling reduces atherosclerosis and promotes arteriogenesis. *J. Am. Heart Assoc*. 2018;7:30
458. Chen IC, Kuo CS, Wu CC, Tsai HY, Lin CP, Li SY, Chou RH, Huang PH, Chen JW, Lin SJ. Chronic hyperuricemia impairs blood flow recovery in the ischemic hindlimb through suppression of endothelial progenitor cells. *Oncotarget*. 2018;9:9285-9298
459. Chen L, Liu C, Sun D, Wang T, Zhao L, Chen W, Yuan M, Wang J, Lu W. MicroRNA-133a impairs perfusion recovery after hindlimb ischemia in diabetic mice. *Bioscience Reports*. 2018;38:BSR20180346
460. Chen L, Wang L, Li Y, Wuang L, Liu Y, Pang N, Luo Y, He J, Zhang L, Chen N, Li R, Wu J. Transplantation of normal adipose tissue improves blood flow and reduces inflammation in high fat fed mice with hindlimb ischemia. *Frontiers in Physiology*. 2018;9:197
461. Fan Y, Lu H, Liang W, Garcia-Barrio MT, Guo Y, Zhang J, Zhu T, Hao Y, Zhang J, Chen YE. Endothelial tfeb (transcription factor eb) positively regulates postischemic angiogenesis. *Circulation Research*. 2018;122:945-957
462. Fromer MW, Chang S, Hagaman ALR, Koko KR, Nolan RS, Zhang P, Brown SA, Carpenter JP, Caputo FJ. The endothelial cell secretome as a novel treatment to prime adipose-derived stem cells for improved wound healing in diabetes. *Journal of Vascular Surgery*. 2018;68:234-244
463. Hayes KL, Messina LM, Schwartz LM, Yan J, Burnside AS, Witkowski S. Type 2 diabetes impairs the ability of skeletal muscle pericytes to augment postischemic neovascularization in db/db mice. *American Journal of Physiology - Cell Physiology*. 2018;314:C534-C544
464. Hou LQ, Yang G, Tang SB, Alcazar C, Joshi P, Strassberg Z, Kim M, Kawamura M, Woo YJ, Shrager J, Ding S, Huang NF. Small molecule derived from carboxyethylpyrrole protein adducts promotes angiogenesis in a mouse model of peripheral arterial disease. *J. Am. Heart Assoc*. 2018;7:11
465. Hourigan ST, Solly EL, Nankivell VA, et al. The regulation of mirnas by reconstituted high-density lipoproteins in diabetes-impaired angiogenesis. *Scientific Reports*. 2018;8:13596

466. Hsieh P-L, Rybalko V, Baker AB, Suggs LJ, Farrar RP. Recruitment and therapeutic application of macrophages in skeletal muscles after hind limb ischemia. *Journal of Vascular Surgery*. 2018;67:1908-1920
467. Hu H, Li L, Yu T, Li Y, Tang Y. Interleukin-22 receptor 1 upregulation and activation in hypoxic endothelial cells improves perfusion recovery in experimental peripheral arterial disease. *Biochem Biophys Res Commun*. 2018;505:60-66
468. Lam YT, Lecce L, Yuen GSC, Wise SG, Handelsman DJ, Ng MKC. Androgen action augments ischemia-induced, bone marrow progenitor cell-mediated vasculogenesis. *International Journal of Biological Sciences*. 2018;14:1985-1992
469. Lee F-Y, Sun C-K, Sung P-H, Chen K-H, Chua S, Sheu J-J, Chung S-Y, Chai H-T, Chen Y-L, Huang T-H, Huang C-R, Li Y-C, Luo C-W, Yip H-K. Daily melatonin protects the endothelial lineage and functional integrity against the aging process, oxidative stress, and toxic environment and restores blood flow in critical limb ischemia area in mice. *Journal of Pineal Research*. 2018;65:e12489
470. Leung OM, Li J, Li X, Chan VW, Yang KY, Ku M, Ji L, Sun H, Waldmann H, Tian XY, Huang Y, Lau J, Zhou B, Lui KO. Regulatory t cells promote apelin-mediated sprouting angiogenesis in type 2 diabetes. *Cell Reports*. 2018;24:1610-1626
471. Li H, Liao Y, Gao L, Zhuang T, Huang Z, Zhu H, Ge J. Coronary serum exosomes derived from patients with myocardial ischemia regulate angiogenesis through the mir-939-mediated nitric oxide signaling pathway. *Theranostics*. 2018;8:2079-2093
472. Minoshima A, Kabara M, Matsuki M, et al. Pericyte-specific ninjurin1 deletion attenuates vessel maturation and blood flow recovery in hind limb ischemia. *Arteriosclerosis Thrombosis and Vascular Biology*. 2018;38:2358-2370
473. Nishimoto S, Aini K, Fukuda D, Higashikuni Y, Tanaka K, Hirata Y, Yagi S, Kusunose K, Yamada H, Soeki T, Shimabukuro M, Sata M. Activation of toll-like receptor 9 impairs blood flow recovery after hind-limb ischemia. *Front. Cardiovasc. Med*. 2018;5:144
474. Onoue Y, Izumiya Y, Hanatani S, et al. Akt1-mediated muscle growth promotes blood flow recovery after hindlimb ischemia by enhancing heme oxygenase-1 in neighboring cells. *Circulation Journal*. 2018;82:2905-2912
475. Pan YW, Yang JY, Wei Y, Wang H, Jiao RK, Moraga A, Zhang ZY, Hu YH, Kong DL, Xu QB, Zeng LF, Zhao Q. Histone deacetylase 7-derived peptides play a vital role in vascular repair and regeneration. *Adv. Sci*. 2018;5:12
476. Pfaff MJ, Mukhopadhyay S, Hoofnagle M, Chabasse C, Sarkar R. Tumor suppressor protein p53 negatively regulates ischemia-induced angiogenesis and arteriogenesis. *Journal of Vascular Surgery*. 2018;68:222S-233S
477. Piao L, Yu C, Xu W, et al. Adiponectin/adiopr1 signal inactivation contributes to impaired angiogenesis in mice of advanced age. *International Journal of Cardiology*. 2018;267:150-155
478. Rodrigues LM, Silva H, Ferreira H, Renault MA, Gadeau AP. Observations on the perfusion recovery of regenerative angiogenesis in an ischemic limb model under hyperoxia. *Physiol. Rep*. 2018;6:10
479. Shi Y, Fan S, Wang D, Huyan T, Chen J, Chen J, Su J, Li X, Wang Z, Xie S, Yun C, Li X, Tie L. Foxo1 inhibition potentiates endothelial angiogenic functions in diabetes via suppression of rock1/drp1-mediated mitochondrial fission. *Biochimica et Biophysica Acta*. 2018;1864:2481-2494
480. Tekabe Y, Li Q, Zhang GP, Johnson J, Schmidt AM, Backer M, Backer J, Johnson LL. Imaging vegf receptors and (v3) integrins in a mouse hindlimb ischemia model of peripheral arterial disease. *Mol. Imaging. Biol*. 2018;20:963-972
481. Tepekoelyue C, Lobenwein D, Urbschat A, Graber M, Pechriggl EJ, Fritsch H, Paulus P, Grimm M, Holfeld J. Shock wave treatment after hindlimb ischaemia results in increased

- perfusion and m2 macrophage presence. *Journal of Tissue Engineering and Regenerative Medicine*. 2018;12:E486-E494
482. Tsumaru S, Masumoto H, Minakata K, Izuhara M, Yamazaki K, Ikeda T, Ono K, Sakata R, Minatoya K. Therapeutic angiogenesis by local sustained release of microRNA-126 using poly lactic-co-glycolic acid nanoparticles in murine hindlimb ischemia. *Journal of Vascular Surgery*. 2018;68:1209-1215
483. Yang H-B, Liu H-M, Yan J-C, Lu Z-Y. Effect of diallyl trisulfide on ischemic tissue injury and revascularization in a diabetic mouse model. *Journal of Cardiovascular Pharmacology*. 2018;71:367-374
484. Zhang XJ, Tang XL, Hamblin MH, Yin KJ. Long non-coding rna malat1 regulates angiogenesis in hindlimb ischemia. *Int. J. Mol. Sci*. 2018;19:15
485. Zhou HJ, Xu Z, Wang Z, Zhang H, Simons M, Min W. Sumoylation of vegfr2 regulates its intracellular trafficking and pathological angiogenesis. *Nature Communications*. 2018;9:3303
486. Zhu Q, Li Q, Niu X, Zhang G, Ling X, Zhang J, Wang Y, Deng Z. Extracellular vesicles secreted by human urine-derived stem cells promote ischemia repair in a mouse model of hindlimb ischemia. *Cellular Physiology and Biochemistry*. 2018;47:1181-1192
487. Boldyreva MA, Shevchenko EK, Molokotina YD, Makarevich PI, Beloglazova IB, Zubkova ES, Dergilev KV, Tsokolaeva ZI, Penkov D, Hsu MN, Hu YC, Parfyonova YV. Transplantation of adipose stromal cell sheet producing hepatocyte growth factor induces pleiotropic effect in ischemic skeletal muscle. *Int. J. Mol. Sci*. 2019;20:17
488. Chang TT, Lin LY, Chen JW. Inhibition of macrophage inflammatory protein-1beta improves endothelial progenitor cell function and ischemia-induced angiogenesis in diabetes. *Angiogenesis*. 2019;22:53-65
489. Ganta VC, Choi M, Farber CR, Annex BH. Antiangiogenic vegf(165)b regulates macrophage polarization via s100a8/s100a9 in peripheral artery disease. *Circulation*. 2019;139:226-242
490. Hess DL, Kelly-Goss MR, Cherepanova OA, Nguyen AT, Baylis RA, Tkachenko S, Annex BH, Peirce SM, Owens GK. Perivascular cell-specific knockout of the stem cell pluripotency gene oct4 inhibits angiogenesis. *Nature Communications*. 2019;10:967
491. Iba T, Naito H, Shimizu S, Rahmawati FN, Wakabayashi T, Takakura N. Isolation of tissue-resident endothelial stem cells and their use in regenerative medicine. *Inflamm. Regen*. 2019;39:8
492. Icli B, Wu W, Ozdemir D, et al. MicroRNA-615-5p regulates angiogenesis and tissue repair by targeting akt/enos (protein kinase b/endothelial nitric oxide synthase) signaling in endothelial cells. *Arteriosclerosis Thrombosis and Vascular Biology*. 2019;39:1458-1474
493. Ito A, Shiroto T, Godo S, Saito H, Tanaka S, Ikumi Y, Kajitani S, Satoh K, Shimokawa H. Important roles of endothelial caveolin-1 in endothelium-dependent hyperpolarization and ischemic angiogenesis in mice. *American Journal of Physiology - Heart and Circulatory Physiology*. 2019;316:H900-H910
494. Jin ZQ, Niu JL, Kapoor N, Liang J, Becerra E, Kolattukudy PE. Essential role of endothelial mcpip in vascular integrity and post-ischemic remodeling. *Int. J. Mol. Sci*. 2019;20:18
495. Kim HJ, Yang H, Jung DH, Hwang JT, Ko B-S. Ameliorating effects of cuscuta chinensis lamak extract on hind-limb ischemia, and angiogenic- or inflammatory associated factors in ovariectomized mice. *Molecular Medicine Reports*. 2019;19:3321-3329
496. Kwon YW, Leo SJ, Heo SC, Lee TW, Park GT, Yoon JW, Kim S-C, Shin HJ, Lee SC, Kim JH. Role of cxcr2 in the ac-pgp-induced mobilization of circulating angiogenic cells and its therapeutic implications. *Stem Cells Translational Medicine*. 2019;8:236-246
497. Lam YT, Lecce L, Yuen SC, Wise SG, Handelsman DJ, Karas RH, Ng MKC. Androgens ameliorate impaired ischemia-induced neovascularization due to aging in male mice. *Endocrinology*. 2019;160:1137-1149

498. Lee GS, Salazar HF, Joseph G, Lok ZSY, Caroti CM, Weiss D, Taylor WR, Lyle AN. Osteopontin isoforms differentially promote arteriogenesis in response to ischemia via macrophage accumulation and survival. *Laboratory Investigation*. 2019;99:331-345
499. Liu L, Cui Y, Li X, Que X, Xiao Y, Yang C, Zhang J, Xie X, Cowan PJ, Tian J, Hao H, Liu Z. Concomitant overexpression of triple antioxidant enzymes selectively increases circulating endothelial progenitor cells in mice with limb ischaemia. *Journal of Cellular and Molecular Medicine*. 2019;23:4019-4029
500. Ludwinski FE, Patel AS, Damodaran G, Cho J, Furnston J, Xu QB, Jayasinghe SN, Smith A, Modarai B. Encapsulation of macrophages enhances their retention and angiogenic potential. *npj Regen. Med*. 2019;4:12
501. Martinez-Ruiz M, Vargas-Robles H, Rios A, Sanchez D, Escalante B. Comparative effects of nitric oxide dependent and independent vasodilation on impaired hindlimb revascularization in enos(-/-) mice. *Canadian Journal of Physiology and Pharmacology*. 2019;97:377-385
502. Said SS, Yin H, Elfarnawany M, Nong Z, O'Neil C, Leong H, Lacefield JC, Mequanint K, Pickering JG. Fortifying angiogenesis in ischemic muscle with fgf9-loaded electrospun poly(ester amide) fibers. *Advanced Healthcare Materials*. 2019;8:1801294
503. Toledo-Flores D, Williamson A, Schwarz N, et al. Vasculogenic properties of adventitial sca-1(+)/cd45(+) progenitor cells in mice: A potential source of vasa vasorum in atherosclerosis. *Scientific Reports*. 2019;9:7286
504. Wang X-L, Qi J, Shi Y-Q, Lu Z-Y, Li R-L, Huang G-J, Ning B-B, Hao L-S, Wang H, Hao C-N, Li Y, Zhou H-S, Duan J-L. Atorvastatin plus therapeutic ultrasound improve postnatal neovascularization in response to hindlimb ischemia via the pi3k-akt pathway. *American Journal of Translational Research*. 2019;11:2877-2886
505. Xiong Y, Chang LL, Tran B, Dai T, Zhong R, Mao YC, Zhu YZ. Zyz-803, a novel hydrogen sulfide-nitric oxide conjugated donor, promotes angiogenesis via cross-talk between stat3 and camkii. *Acta Pharmacol. Sin*. 2019;17:17
506. Yang H, Jung DH, Lee HW. Therapeutic effect of cnidium officinale makino extract on ovariectomized hind-limb ischemic mice. *Integr. Med. Res*. 2019;8:107-115
507. Yuan J, Tan JTM, Rajamani K, Solly EL, King EJ, Lecce L, Simpson PJJ, Lam YT, Jenkins AJ, Bursill CA, Keech AC, Ng MKC. Fenofibrate rescues diabetes-related impairment of ischemia-mediated angiogenesis by ppar alpha-independent modulation of thioredoxin-interacting protein. *Diabetes*. 2019;68:1040-1053
508. Zheng XJ, Liu Y, Zhang WC, Liu Y, Li C, Sun XN, Zhang YY, Xu J, Jiang X, Zhang L, Yang W, Duan SZ. Mineralocorticoid receptor negatively regulates angiogenesis through repression of stat3 activity in endothelial cells. *Journal of Pathology*. 2019;248:438-451
509. Zhu YF, Gao MR, Zhou TT, Xie MX, Mao AQ, Feng L, Yao XQ, Wong WT, Ma X. The trpc5 channel regulates angiogenesis and promotes recovery from ischemic injury in mice. *Journal of Biological Chemistry*. 2019;294:28-37

## Major Resources Tables

### Animals (in vivo studies)

| <b>Species</b> | <b>Vendor or Source</b>             | <b>Background Strain</b> | <b>Sex</b> |
|----------------|-------------------------------------|--------------------------|------------|
| Mouse          | The Jackson Laboratory              | C57BL/6J                 | Male       |
| Mouse          | Charles River Laboratories          | C57BL/6N                 | Male       |
| Mouse          | The Jackson Laboratory / Inbreeding | C57BL/6J                 | Male       |

### Antibodies

| <b>Target antigen</b> | <b>Vendor or Source</b> | <b>Catalog #</b> | <b>Working concentration</b> |
|-----------------------|-------------------------|------------------|------------------------------|
| CD31                  | Dianova (SZ31), Rat     | DIA 310          | 1:20                         |
| Ki-67                 | Abcam, Rabbit           | Ab16667          | 1:400                        |
| Rat IgG               | Thermo Fisher           | A11006           | 1:100                        |
| Rabbit IgG            | Thermo Fisher           | A11012           | 1:100                        |
